# Supplementary material for: Saccharomyces cerevisiae DJ-1 paralogs maintain genome integrity through glycation repair of nucleic acids and proteins
Source: eLife journal article supplement (doi:10.7554/elife.88875), 2023-08-07
Supplement: supp [file elife-88875-supp-v1.zip]

## Mutation profile of SOD1, RAD14, and COX2

 Mutations  Original sequence Fp-Forward primer; Rp-reverse primer

### WT

### SOD1

|      |                                                               |     |
|------|---------------------------------------------------------------|-----|
| WTFP | -----ACTGGGTCCGGGTGTTGGTCAA                                   | 22  |
| SOD1 | ----ATGGT-TCAAGCAGTCGCAGTGTTAAAGGGTGATGCCGGTGTCTCTGGTGTGTGTC  | 54  |
| WTRP | TTTTTATGGTTTCAAGCACTCGCAGTGTTAAAGGGTGATGCCGGTGTCTCTGGTGTGTGTC | 60  |
|      | *** ** ** *                                                   |     |
| WTFP | GTTTCAAACAGGCTTTCCAAATCCAAGCCAACCACTGTCTCTTACAAGATCGCTGGTAAC  | 82  |
| SOD1 | AAGTTCGAACAGGCTTCCGAATCCGAGCCAACCACTGTCTCTTACGAGATCGCTGGTAAC  | 114 |
| WTRP | AAGTTCGAACAGGCTTCCGAATCCGAGCCAACCACTGTCTCTTACGAGATCGCTGGTAAC  | 120 |
|      | * * * **** *****                                              |     |
| WTFP | AGTCCTAACGCAAAACGTGGGTTCCACATTCATGAGTTGGAAATGCCACCAAGGGTTGT   | 142 |
| SOD1 | AGTCCTAACGCAGAACGTGGGTTCCACATTCATGAGTTGGAGATGCCACCAATGGTTGT   | 174 |
| WTRP | AGTCCTAACGCAGAACGTGGGTTCCACATTCATGAGTTGGAGATGCCACCAATGGTTGT   | 180 |
|      | ***** *****                                                   |     |
| WTFP | GTCTCTGCTGGTCCTCACTTCAATCCTTTCAAAAAACACATGGTGCTCCAACCTGACAAA  | 202 |
| SOD1 | GTCTCTGCTGGTCCTCACTTCAATCCTTTCAAGAAGACACATGGTGCTCCAACCTGACGAA | 234 |
| WTRP | GTCTCTGCTGGTCCTCACTTCAATCCTTTCAAGAAGACACATGGTGCTCCAACCTGACGAA | 240 |
|      | ***** ** *****                                                |     |
| WTFP | TTCAAACATGTCGGTGACATGGGTAACGTAAAAACGGACAAAAATGGTGTGGCCAAGGGC  | 262 |
| SOD1 | GTCAGACATGTCGGTGACATGGGTAACGTAAAGACGGACGAAAATGGTGTGGCCAAGGGC  | 294 |
| WTRP | GTCAGACATGTCGGTGACATGGGTAACGTAAAGACGGACGAAAATGGTGTGGCCAAGGGC  | 300 |
|      | *** *****                                                     |     |
| WTFP | TCCTTCAAGGACTCTTTGATCAAGCTTATCGGTCTACCTCCGTTGTAGGCAAAACCGTC   | 322 |
| SOD1 | TCCTTCAAGGACTCTTTGATCAAGCTTATCGGTCTACCTCCGTTGTAGGCAGAAGCGTC   | 354 |
| WTRP | TCCTTCAAGGACTCTTTGATCAAGCTTATCGGTCTACCTCCGTTGTAGGCAGAAGCGTC   | 360 |
|      | ***** ** ****                                                 |     |
| WTFP | TTTATCCACCCCGGCCAAAATGACTTAGGTAAGGGTGACACTGAAAAATCTTTGAAACT   | 382 |
| SOD1 | GTTATCCACGCCCGGCCAAGATGACTTAGGTAAGGGTGACACTGAAGAATCTTTGAAGACT | 414 |
| WTRP | GTTATCCACGCCCGGCCAAGATGACTTAGGTAAGGGTGACACTGAAGAATCTTTGAAGACT | 420 |
|      | ***** ***** *                                                 |     |
| WTFP | GGTAATGCCGGTCCAAAACCAACCTGTGGTGTCAATTGGTCTAACCAACAAAAAAA      | 439 |
| SOD1 | GGTAATGCCGGTCCAAAACCAACCTGTGGTGTCAATTGGTCTAACCAACTAA-----     | 465 |
| WTRP | GTA-ATGCCGTCCAAGA-----                                        | 436 |
|      | * ***** *                                                     |     |

### RAD14

|         |                                                              |     |
|---------|--------------------------------------------------------------|-----|
| WTRADRp | -----                                                        | 0   |
| WTRADFP | -----                                                        | 0   |
| RAD14   | ATGACTCCCGAACAAAAGGCCAACTAGTATGTGTGAAAATGATTCTGTGTTTGTATTTT  | 60  |
| WTRADRp | -----                                                        | 0   |
| WTRADFP | -----                                                        | 0   |
| RAD14   | AACCGTGGGTTTCTTTTACTAACAATTTAACGATGAGATGAGCTGTGCAGGAGGCTAAC  | 120 |
| WTRADRp | -----                                                        | 0   |
| WTRADFP | -----                                                        | 0   |
| RAD14   | AGGAAATTAGCAATAGAACGGTTAAGAAAAAGGGGAATACTGAGTAGCGACCAATTGAAT | 180 |

|         |                                                                                        |     |
|---------|----------------------------------------------------------------------------------------|-----|
| WTRADRp | -----                                                                                  | 0   |
| WTRADFP | -----                                                                                  | 0   |
| RAD14   | CGAATAGAAAGTAGGAATGAACCTTTAAAAACCCGGCCTCTCGCAGTTACTAGTGGCAGC                           | 240 |
| WTRADRp | -----                                                                                  | 0   |
| WTRADFP | -----                                                                                  | 0   |
| RAD14   | AATCGGGATGATAATGCAGCAGCCGAGTACATGTGCCAAATCATAATGGACAACCGTCT                            | 300 |
| WTRADRp | -----                                                                                  | 0   |
| WTRADFP | -----                                                                                  | 0   |
| RAD14   | GCGCTTGCTAACACTAACACTAACTACTTCACTTTATGGTAGCGGAGTAGTTGATGGA                             | 360 |
| WTRADRp | -----GCGTCGGTACTCGACAAAAGGCCAACGGATAGAATCAGACAGAGCATA                                  | 47  |
| WTRADFP | -----CTGGAATTAT--CGACTAGCAT-                                                           | 20  |
| RAD14   | AGTAAAGGGATGCGTCGGTACTCGACAAAAGGCCAACGGATAGAATCAGACCTAGCATA<br>* *.:* :** ... *****    | 420 |
| WTRADRp | AGGAAACAAGATTACATTGAGTACGATTTTCCCCCATGCAGAACCTGAATGGTGGTTAT                            | 107 |
| WTRADFP | -AGGAAACAAGATTACATTGAGTACGATTTTGCCACCATGCAGAACTTGAATGGTGGTTAT                          | 79  |
| RAD14   | AGGAAACAAGATTACATTGAGTACGATTTTGCCACCATGCAGAACTTGAATGGTGGTTAT<br>. * . ***** ** . ***** | 480 |
| WTRADRp | ATCAACCATAAGGACAAGCTTCCAAATCTGACTCTACCGATGACCAAGAATTTGAATGT                            | 167 |
| WTRADFP | ATCAACCCTAAGGACAAGCTTCCAAATCTGACTTTACCGATGACCAAGAATTTGAATCT                            | 139 |
| RAD14   | ATCAACCCTAAGGACAAGCTTCCAAATCTGACTTTACCGATGACCAAGAATTTGAATCT<br>***** . ***** *         | 540 |
| WTRADRp | GAGTTTGGATCTAAAAAGCAGAAGACACTACAGGACTGGAAAAAGGAACAACCTGAACGG                           | 227 |
| WTRADFP | GAGTTTGGATCTAAAAAGCAGAAGACACTACAGGACTGGAAAAAGGAACAACCTGAACGG                           | 199 |
| RAD14   | GAGTTTGGATCTAAAAAGCAGAAGACACTACAGGACTGGAAAAAGGAACAACCTGAACGG<br>*****                  | 600 |
| WTRADRp | AAAATGTTGTACGAAAATGCACCTCCTCCAGAGCATATTTCAAAGGCGCCGAAATGTATT                           | 287 |
| WTRADFP | AAAATGCTGTACGAAAATGCACCTCCTCCAGAGCATATTTCAAAGGCGCCGAAATGTATT                           | 259 |
| RAD14   | AAAATGCTGTACGAAAATGCACCTCCTCCAGAGCATATTTCAAAGGCGCCGAAATGTATT<br>***** *****            | 660 |
| WTRADRp | GAATGTCATATTAATATTGAGATGGATCCTGTGATACATGATGTGTTCAAGTTACAAGTT                           | 347 |
| WTRADFP | GAATGTCATATTAATATTGAGATGGATCCTGTGCTACATGATGTGTTCAAGTTACAAGTT                           | 319 |
| RAD14   | GAATGTCATATTAATATTGAGATGGATCCTGTGCTACATGATGTGTTCAAGTTACAAGTT<br>***** . *****          | 720 |
| WTRADRp | TGTAAACAGTGTTCTAAGGAGCATCCAGAAAAGTATGCATTACTGACGAAAACAGAATGT                           | 407 |
| WTRADFP | TGTAAACAGTGTTCTAAGGAGCATCCAGAAAAGTATGCACTACTGACGAAAACAGAATGT                           | 379 |
| RAD14   | TGTAAACAGTGTTCTAAGGAGCATCCAGAAAAGTATGCACTACTGACGAAAACAGAATGT<br>***** *****            | 780 |
| WTRADRp | AAGGAAGATTACTTTTTACCAGACCCCGAATTGAATGATGAGGATTTCTTTCATAGACTA                           | 467 |
| WTRADFP | AAGGAAGATTACTTTTTAACAGACCCCGAATTGAATGATGAGGATCTCTTTCATAGACTA                           | 439 |
| RAD14   | AAGGAAGATTACTTTTTAACAGACCCCGAATTGAATGATGAGGATCTCTTTCATAGACTA<br>***** . *****          | 840 |
| WTRADRp | GAAAAGCCGAACCCCTCATTCGGGGACATTTGCAAGAATGCAACTATTTGTTAGATGTGAA                          | 527 |
| WTRADFP | GAAAAGCCGAACCCCTCATTCGGGGACATTTGCAAGAATGCAACTATTTGTTAGATGTGAA                          | 499 |
| RAD14   | GAAAAGCCGAACCCCTCATTCGGGGACATTTGCAAGAATGCAACTATTTGTTAGATGTGAA<br>*****                 | 900 |
| WTRADRp | GTGGAAGCCTTTGCGTTCAAGAAATGGGGTGAGAGAAGAAGGTTTGTAGATGAGGAATGGCAA                        | 587 |
| WTRADFP | GTGGAAGCCTTTGCGTTCAAGAAATGGGGTGAGAGAAGAAGGTTTGTAGATGAGGAATGGCAA                        | 559 |
| RAD14   | GTGGAAGCCTTTGCGTTCAAGAAATGGGGTGAGAGAAGAAGGTTTGTAGATGAGGAATGGCAA<br>***** . *****       | 960 |

|                        |                                                               |      |
|------------------------|---------------------------------------------------------------|------|
| WTRADRp                | CGTCGTGAAGAAGGAAAGGCTCACAGAAGGGAGAAAAAATACGAAAAGAAAATCAAGGAA  | 647  |
| WTRADFP                | CGTCGTGAAGAAGGAAAGGCTCACAGAAGGGAGAAAAAATACGAAAAGAAAATCAAGGAA  | 619  |
| RAD14                  | CGTCGTGAAGAAGGAAAGGCTCACAGAAGGGAGAAAAAATACGAAAAGAAAATCAAGGAA  | 1020 |
| *****                  |                                                               |      |
| WTRADRp                | ATGCGACTGAAAACAAGAGCTCAAGAATATATTAATAGATTAAGAGAAAAGAAGCATGGG  | 707  |
| WTRADFP                | ATGCGACTGAAAACAAGAGCTCAAGAATATACTAATAGATTAAGAGAAAAGAAGCATGGG  | 679  |
| RAD14                  | ATGCGACTGAAAACAAGAGCTCAAGAATATACTAATAGATTAAGAGAAAAGAAGCATGGG  | 1080 |
| *****                  |                                                               |      |
| WTRADRp                | AAAGCCCATATTCATCATTTTGTAGTATCCAGTTGATGGAGGTATTGATGAAGACGGTTAT | 767  |
| WTRADFP                | AAAGCCCATATTCATCATTTTGTAGTATCCAGTTGATGGAGGTATTGATGAAGACGGTTAT | 739  |
| RAD14                  | AAAGCCCATATTCATCATTTTGTAGTATCCAGTTGATGGAGGTATTGATGAAGACGGTTAT | 1140 |
| *****                  |                                                               |      |
| WTRADRp                | CAAAT-CAAAGAAGAAGAG--ACAGAC-GCGTTC-----                       | 798  |
| WTRADFP                | CAAATTCAAAGAAGAAGATGTACAGACTGCGGGCTAGAACTGAAGAATTTGAACTTTT    | 799  |
| RAD14                  | CAAATTCAAAGAAGAAGATGTACAGACTGCGGGCTAGAACTGAAGAATTGACATTTAA    | 1200 |
| ***** ***** ***** ** * |                                                               |      |
| WTRADRp                | --- 798                                                       |      |
| WTRADFP                | AAA 802                                                       |      |
| RAD14                  | --- 1200                                                      |      |

## COX2

|        |                                                               |                                                    |                  |
|--------|---------------------------------------------------------------|----------------------------------------------------|------------------|
| QCOXRP | TTTTTTTTTA                                                    | TGTTAGATTTATTAAGATTACAATTAACAACATTCATTATGAATGATGT  | 60               |
| QCOXFP | -----                                                         | -----TAAAAATTCTTATGAATGATGT                        | 23               |
| COX2   | -----                                                         | ATGTTAGATTTATTAAGATTACAATTAACAACATTCATTATGAATGATGT | 50               |
|        |                                                               |                                                    | : **. : * .***** |
| QCOXRP | ACCAACACCTTATGCATGTTATTTTCAGGATTCAGCAACACCAAATCAAGAAGGTATTTT  | 120                                                |                  |
| QCOXFP | ACCAACACCTTATGCATGTTATTTTCAGGATTCAGCAACACCAAATCAAGAAGGTATTTT  | 83                                                 |                  |
| COX2   | ACCAACACCTTATGCATGTTATTTTCAGGATTCAGCAACACCAAATCAAGAAGGTATTTT  | 110                                                |                  |
| *****  |                                                               |                                                    |                  |
| QCOXRP | AGAATTACATGATAATATTATGTTTTATTTATTAGTTATTTTAGGTTTAGTATCTTGAAT  | 180                                                |                  |
| QCOXFP | AGAATTACATGATAATATTATGTTTTATTTATTAGTTATTTTAGGTTTAGTATCTTGAAT  | 143                                                |                  |
| COX2   | AGAATTACATGATAATATTATGTTTTATTTATTAGTTATTTTAGGTTTAGTATCTTGAAT  | 170                                                |                  |
| *****  |                                                               |                                                    |                  |
| QCOXRP | GTTATATACAATTGTTATAACATATTCAAAAAATCCTATTGCATATAAATATATTAAACA  | 240                                                |                  |
| QCOXFP | GTTATATACAATTGTTATAACATATTCAAAAAATCCTATTGCATATAAATATATTAAACA  | 203                                                |                  |
| COX2   | GTTATATACAATTGTTATAACATATTCAAAAAATCCTATTGCATATAAATATATTAAACA  | 230                                                |                  |
| *****  |                                                               |                                                    |                  |
| QCOXRP | TGGACAAACTATTGAAGTTATTTGAACAATTTTTCCAGCTGTAATTTTATTAATTATTGC  | 300                                                |                  |
| QCOXFP | TGGACAAACTATTGAAGTTATTTGAACAATTTTTCCAGCTGTAATTTTATTAATTATTGC  | 263                                                |                  |
| COX2   | TGGACAAACTATTGAAGTTATTTGAACAATTTTTCCAGCTGTAATTTTATTAATTATTGC  | 290                                                |                  |
| *****  |                                                               |                                                    |                  |
| QCOXRP | TTTTCCTTCATTTATTTTATTATATTTATGTGATGAAGTTATTTACCAGCTATAACTAT   | 360                                                |                  |
| QCOXFP | TTTTCCTTCATTTATTTTATTATATTTATGTGATGAAGTTATTTACCAGCTATAACTAT   | 323                                                |                  |
| COX2   | TTTTCCTTCATTTATTTTATTATATTTATGTGATGAAGTTATTTACCAGCTATAACTAT   | 350                                                |                  |
| *****  |                                                               |                                                    |                  |
| QCOXRP | TAAAGCTATTGGATATCAATGATATTGAAAATATGAATATTCAGATTTTATTAATGATAG  | 420                                                |                  |
| QCOXFP | TAAAGCTATTGGATATCAATGATATTGAAAATATGAATATTCAGATTTTATTAATGATAG  | 383                                                |                  |
| COX2   | TAAAGCTATTGGATATCAATGATATTGAAAATATGAATATTCAGATTTTATTAATGATAG  | 410                                                |                  |
| *****  |                                                               |                                                    |                  |
| QCOXRP | TGGTGAAACTGTTGAATTTGAATCATATGTTATTCCCTGATGAATTATTAGAAGAAGGTCA | 480                                                |                  |
| QCOXFP | TGGTGAAACTGTTGAATTTGAATCATATGTTATTCCCTGATGAATTATTAGAAGAAGGTCA | 443                                                |                  |
| COX2   | TGGTGAAACTGTTGAATTTGAATCATATGTTATTCCCTGATGAATTATTAGAAGAAGGTCA | 470                                                |                  |

```

*****

QCOXRP      ATTAAGATTATTAGATACTGATACTTCTATAGTTGTACCTGTAGATACACATATTAGATT      540
QCOXFP      ATTAAGATTATTAGATACTGATACTTCTATAGTTGTACCTGTAGATACACATATTAGATT      503
COX2        ATTAAGATTATTAGATACTGATACTTCTATAGTTGTACCTGTAGATACACATATTAGATT      530
*****

QCOXRP      CGTTGTAACAGCTGCTGATGTTATTCATGATTTTGCATTCCAAGTTTAGGTATTAAAGT      600
QCOXFP      CGTTGTAACAGCTGCTGATGTTATTCATGATTTTGCATTCCAAGTTTAGGTATTAAAGT      563
COX2        CGTTGTAACAGCTGCTGATGTTATTCATGATTTTGCATTCCAAGTTTAGGTATTAAAGT      590
*****

QCOXRP      TGATGCTACTCCTGGTAGATTAAATCAAGTTTCTGCTTTAATTCAAAGAGAAGGTGTCTT      660
QCOXFP      TGATGCTACTCCTGGTAGATTAAATCAAGTTTCTGCTTTAATTCAAAGAGAAGGTGTCTT      623
COX2        TGATGCTACTCCTGGTAGATTAAATCAAGTTTCTGCTTTAATTCAAAGAGAAGGTGTCTT      650
*****

QCOXRP      CTATGGAGCATGTTCTGAGTTGTGTGGGACCAGGTCATGCAAATATGCCCAATTAAGATC      720
QCOXFP      CTATGGAGCATGTTCTGAGTTGTGTGGGA-CAGGTCATGCAAATATGCC-AATTAAGATC      681
COX2        CTATGGAGCATGTTCTGAGTTGTGTGGGA-CAGGTCATGCAAATATGCC-AATTAAGATC      708
*****

QCOXRP      GAAGCAGTATCATC--CTTTTTTTT----- 743
QCOXFP      GAAGCAGTATCATTACCTAAATTTTTGGAATGATTAAATGAAACAT[REDACTED]AAAAAAC 736
COX2        GAAGCAGTATCATTACCTAAATTTTTGGAATGATTAAATGAAAAAT[REDACTED]AA----- 756
*****          **:.:****

```

## ΔQ

### **RAD14**

```

QRAD14Fp    -----AAAGGCCAATGCGTGAAATCAATTCTGTGTTTGTATTTT      39
WTRAD14     ATGACTCCCGAACAAAGGCCAACTAGTATGTTGTGAAAAATGATTCTGTGTTTGTATTTT      60
QRAD14Rp    -----GGGGGTACTTTTTTTTTTTT      19
              *   *** *   ****

QRAD14Fp    AACCGTGGGT--TTCTTTTTACTAACAATTTAACGATGAGATGA---GCTGTGCAGGAGG      94
WTRAD14     AACCGTGGGT--TTCTTTTTACTAACAATTTAACGATGAGATGA---GCTGTGCAGGAGG      115
QRAD14Rp    AAAAATATATTTTTCTTCTTTTT-CCTGTTTGGGCAGAAGGCCCTTCCTCATTTTGGGG      78
              **   *   *   ***** **   *   ***   **   *   **

QRAD14Fp    CTACAGGAAATTAGCAATAGAACGGTTAAGAAAAAGGGGAATACTGAGTAGCG----AC      150
WTRAD14     CTACAGGAAATTAGCAATAGAACGGTTAAGAAAAAGGGGAATACTGAGTAGC---GACC      172
QRAD14Rp    GGGGGGGGCAAGTTCCCTCCAAAC-----CTCAAAGCATCCTTTTTTCCCCCCCC      129
              ** ** *   *   ***   *   **   *   **   *   *

QRAD14Fp    [REDACTED]AATGAATCGAATAGAAAGTAGGAATGAACCTTTAAAAACCCGGCCTCTCGCAGTTACT      210
WTRAD14     [REDACTED]AAT-TGAATCGAATAGAAAGTAGGAATGAACCTTTAAAAACCCGGCCTCTCGCAGTTACT      231
QRAD14Rp    [REDACTED]CTATTTTGTAGAGCAAAAGAGGAGGGCTGCTTTTCAC-----      168
              *   *   *   ***   ***** *   ****   *

QRAD14Fp    AGTGGCAGCAATCGGGATGATAATGCAGCAGCCGAGTACATGTGCCAAATCATAATGGA      270
WTRAD14     AGTGGCAGCAATCGGGATGATAATGCAGCAGCCGAGTACATGTGCCAAATCATAATGGA      291
QRAD14Rp    -----TTCTAAACTCAAAA---A      183
              *   ** *** **   *

QRAD14Fp    CAACCGTCTGCGCTTGCTAACACTAACACTAACACTACTTCACTTTATGGTAGCGGAGTA      330
WTRAD14     CAACCGTCTGCGCTTGCTAACACTAACACTAACACTACTTCACTTTATGGTAGCGGAGTA      351
QRAD14Rp    AAAAGCTCTCCTCTTTTAAAAAAACC-----GCGGCGGGGGGGGGGGGGGAATTA      237
              **   *** *   **   *** *   *   *   *   *   **   *   *   **

QRAD14Fp    GTTGATGGAAGTAAAAGGGATGCGTCGGTACTC[REDACTED]ACAAAAGGCCAACGGATAGAATCAGA      390
WTRAD14     GTTGATGGAAGTAAAAGGGATGCGTCGGTACTC[REDACTED]ACAAAAGGCCAACGGATAGAATCAGA      411
QRAD14Rp    GTGGGTGGGTGAGGAAGAGCGCCCTCAGACCC[REDACTED]CCCA-CGGGGGGGTGTTTGACAAAAA      296
              ** *   *** *   ***** *   ** *   *   *   *   *   *

```

| Sequence | Position |
|----------|----------|
| QRAD14Fp | 438      |
| WTRAD14  | 457      |
| QRAD14Rp | 353      |
| QRAD14Fp | 497      |
| WTRAD14  | 509      |
| QRAD14Rp | 410      |
| QRAD14Fp | 557      |
| WTRAD14  | 556      |
| QRAD14Rp | 464      |
| QRAD14Fp | 617      |
| WTRAD14  | 611      |
| QRAD14Rp | 519      |
| QRAD14Fp | 677      |
| WTRAD14  | 662      |
| QRAD14Rp | 570      |
| QRAD14Fp | 735      |
| WTRAD14  | 713      |
| QRAD14Rp | 621      |
| QRAD14Fp | 847      |
| WTRAD14  | 830      |
| QRAD14Rp | 738      |
| QRAD14Fp | 907      |
| WTRAD14  | 881      |
| QRAD14Rp | 789      |
| QRAD14Fp | 937      |
| WTRAD14  | 941      |
| QRAD14Rp | 849      |
| QRAD14Fp | 984      |
| WTRAD14  | 1000     |
| QRAD14Rp | 908      |
| QRAD14Fp | 1044     |
| WTRAD14  | 1053     |
| QRAD14Rp | 961      |
| QRAD14Fp | 1104     |
| WTRAD14  | 1112     |
| QRAD14Rp | 1020     |
| QRAD14Fp | 1163     |

|                 |                                                            |      |
|-----------------|------------------------------------------------------------|------|
| <b>WTRAD14</b>  | TGATGGAGGTAT-----TGATGAAGACGGTTATCAAATTCAAAGAGAAGATGTACAGA | 1166 |
| <b>QRAD14Rp</b> | TGATGGAGGTAT-----TGATGAAGACGGTTATCAAATTCAAAGAGAAGATGTACAGA | 1074 |
|                 | * * * * * * * * * * * * *                                  |      |

|                 |                                                                             |      |
|-----------------|-----------------------------------------------------------------------------|------|
| <b>QRAD14Fp</b> | T <b>CCG</b> GGGG <b>GGGCGGG</b> GGAGGGGGGGGAAATTTTTGCTCCCCCCCCCTCTCCCTCGGT | 1223 |
| <b>WTRAD14</b>  | C <b>TGC</b> GGGC <b>TAGAAAC</b> TGAAGAAATTGACATTTAA-----                   | 1200 |
| <b>QRAD14Rp</b> | C <b>CCG</b> CCCC <b>CCCTTTT</b> -----                                      | 1089 |

## SOD1

|                |                                                                                                                                     |    |
|----------------|-------------------------------------------------------------------------------------------------------------------------------------|----|
| <b>Qsod1Rp</b> | ----T <b>AAAAA</b> AG <b>CA</b> AGGGCTT <b>GA</b> CCGGGCA <b>TACCG</b> GGTCT <b>T</b> -----CCA                                      | 45 |
| <b>QSODFp</b>  | ----- <b>TAAC</b> GCTA <b>AA</b> GT <b>AG</b> CGGTAT <b>CT</b> GGTGT <b>GT</b> <b>CGAGT</b> TCT <b>CACA</b>                         | 45 |
| <b>WTSOD1</b>  | ATGGT <b>TCAA</b> GCAG <b>TC</b> GCAG <b>TG</b> TT <b>AAAG</b> GGT <b>GAT</b> CCGGT <b>GTCTCT</b> GGT <b>GTTGT</b> CAAG <b>TT</b> C | 60 |
|                | * * * * *                                                                                                                           |    |

|                |                                                                                                |     |
|----------------|------------------------------------------------------------------------------------------------|-----|
| <b>qsod1Rp</b> | <b>AAG</b> AT <b>CT</b> CTTCAGTGT <b>CAC</b> CCATTACCTAAGTCATCTTG <b>GC</b> GGCGTGGATAACGACGCT | 105 |
| <b>QSODFp</b>  | <b>ACA</b> GAATATCCGAAT <b>CAA</b> AGCCAACCACTGTCTCTACGA <b>AT</b> CGTGGTAACAGTCCT             | 105 |
| <b>WTSOD1</b>  | <b>GAA</b> CAG <b>GG</b> CTTCCGAAT <b>C</b> AGCCAACCACTGTCTCTACGA <b>G</b> ATCGTGGTAACAGTCCT   | 120 |
|                | * * * * * * * * * * * * *                                                                      |     |

|                |                                                                                 |     |
|----------------|---------------------------------------------------------------------------------|-----|
| <b>qsod1Rp</b> | TCTGCC <b>A</b> CAACGGAGGTAGGACCGATAAGCTTGATCAAAGAGTCCTTTGAAGGAGCCCT            | 165 |
| <b>QSODFp</b>  | AACGC <b>AAA</b> -----CGTGGGT <b>TCCA</b> -----CATT <b>CAT</b> GAGTTGGAAATGCCAC | 149 |
| <b>WTSOD1</b>  | AACGC <b>GAA</b> -----CGTGGGT <b>TCCA</b> -----CATT <b>CAT</b> GAGTTGGAGATGCCAC | 164 |
|                | * * * * * * * * * * * * *                                                       |     |

|                |                                                                                |     |
|----------------|--------------------------------------------------------------------------------|-----|
| <b>qsod1Rp</b> | TGGCCACACCATTTTCGTCGGTCTTTACGTTACCCATGTCAC <b>CGA</b> ATGTCTGA <b>CT</b> TCGT  | 225 |
| <b>QSODFp</b>  | CAATGGTTGTGTCTCTGCTGGTCCTCACTTCAATCCTTTCAA <b>AAA</b> ACACATGG <b>CG</b> CTCC  | 209 |
| <b>WTSOD1</b>  | CAATGGTTGTGTCTCTGCTGGTCCTCACTTCAATCCTTTCAA <b>GAG</b> ACACATGG <b>T</b> GTCTCC | 224 |
|                | * * * * * * * * * * * * *                                                      |     |

|                |                                                                                                  |     |
|----------------|--------------------------------------------------------------------------------------------------|-----|
| <b>qsod1Rp</b> | CAGTTGGAGCACCA <b>GT</b> GTCTTCTTGAAAGGATTGAAGTGAGGACCAG <b>CAG</b> AGACACAAC                    | 285 |
| <b>QSODFp</b>  | AAC <b>TGAC</b> AAAGTC <b>AA</b> ACATGTCCGTGACATGGGTAA <b>CGTAA</b> AGACGGAC <b>AAAA</b> ATGGTGT | 269 |
| <b>WTSOD1</b>  | AAC <b>TGAC</b> AAAGTC <b>AA</b> ACATGTCCGTGACATGGGTAA <b>CGTAA</b> AGACGGAC <b>AAAA</b> ATGGTGT | 284 |
|                | * * * * * * * * * * * * *                                                                        |     |

|                |                                                                                                        |     |
|----------------|--------------------------------------------------------------------------------------------------------|-----|
| <b>qsod1Rp</b> | C-----ATT--GGTGG <b>CAT</b> CTCCAA <b>ACT</b> CATGAATGTGGAAC <b>CG</b> ACGTTCT <b>GG</b>               | 332 |
| <b>QSODFp</b>  | GGCCAA <b>AGG</b> CTCCTTCAAG <b>GGCC</b> CTTTGATA <b>AA</b> CTTATCGGTCCTAC <b>CC</b> CCGTTGT <b>AG</b> | 329 |
| <b>WTSOD1</b>  | GGCCAA <b>AGG</b> CTCCTTCAAG <b>ACT</b> CTTTGAT <b>CAAG</b> CTTATCGGTCCTAC <b>CT</b> CCGTTGT <b>AG</b> | 344 |
|                | * * * * * * * * * * * * *                                                                              |     |

|                |                                                                                                                                              |     |
|----------------|----------------------------------------------------------------------------------------------------------------------------------------------|-----|
| <b>qsod1Rp</b> | T <b>AGG</b> ACTGT <b>TAC</b> AGCGATCT <b>GG</b> AAG <b>AA</b> CA <b>STG</b> STTGG <b>CT</b> CGGAT <b>CC</b> GAAC <b>CT</b> GG               | 392 |
| <b>QSODFp</b>  | CC <b>AAA</b> ACCGTCTTT <b>AC</b> CGAC <b>CC</b> GG <b>CA</b> ANGAC <b>ACTT</b> ATGTATGGT <b>AGA</b> AC <b>GAA</b> --CAAG                    | 387 |
| <b>WTSOD1</b>  | C <b>AGA</b> AG <b>CG</b> TCGTT <b>AT</b> CC <b>AC</b> CGCG <b>GC</b> CAAGAT <b>GAC</b> TTAGGT <b>AA</b> GGT <b>GAC</b> ACT <b>G</b> A--AGAA | 402 |
|                | * * * * * * * * * * * * *                                                                                                                    |     |

|                |                                                                                                                          |     |
|----------------|--------------------------------------------------------------------------------------------------------------------------|-----|
| <b>qsod1Rp</b> | TCTAACTT <b>GAC</b> GAC <b>AG</b> CTGGAG <b>GT</b> CCGGGATCAGCCTGTTGAC <b>GAG</b> AAAG <b>AA</b> TGGAT <b>G</b>          | 452 |
| <b>QSODFp</b>  | CC <b>TTA</b> CTT <b>ACC</b> GACAC <b>GCA</b> -G <b>AC</b> CC <b>CC</b> CGCCCCCCTGTGGT <b>GCT</b> TTT--TTT <b>GCT</b> G  | 442 |
| <b>WTSOD1</b>  | TCTTT <b>GAA</b> GAC <b>TG</b> TAATGC <b>C</b> -GGTCC <b>AA</b> GACCAGCCTGTGGT <b>G</b> TCA <b>TT</b> --GG--T <b>CTA</b> | 456 |
|                | * * * * * * * * * * * * *                                                                                                |     |

|                |                    |     |
|----------------|--------------------|-----|
| <b>qsod1Rp</b> | AAGAA <b>AAA</b>   | 461 |
| <b>QSODFp</b>  | ACCA <b>AT</b> GAA | 451 |
| <b>WTSOD1</b>  | ACCA <b>ACT</b> AA | 465 |
|                | * * * *            |     |

## COX2

|               |                                                                                        |    |
|---------------|----------------------------------------------------------------------------------------|----|
| <b>QCOXFp</b> | -----TAATATCCCGGCATTCCCTGATCTT                                                         | 25 |
| <b>QCOXRp</b> | TTTTTTTTTTTTTT <b>AT</b> GTTAGATT <b>TAT</b> TAAAGATTACAATTAACAACATT <b>CATT</b> TAGAA | 60 |
| <b>COX2</b>   | ----- <b>AT</b> GTTAGATT <b>TAT</b> TAAAGATTACAATTAACAACATT <b>CATT</b> TAGAA          | 44 |
|               | * * * * *                                                                              |    |

|               |                                                                                                          |     |
|---------------|----------------------------------------------------------------------------------------------------------|-----|
| <b>QCOXFp</b> | TGAGATACTTGCGT <b>T</b> CC <b>T</b> GCTA---TAC <b>CT</b> CAGCTGT <b>CAT</b> GCTGGG <b>CCG</b> TGGAATAGGC | 82  |
| <b>QCOXRp</b> | TGATGTACCAACAC <b>CT</b> TATGCATGTTATTT <b>CAG</b> GATT <b>CAG</b> CAACACCA <b>AA</b> TCAAGAAGG          | 120 |
| <b>COX2</b>   | TGATGTACCAACAC <b>CT</b> TATGCATGTTATTT <b>CAG</b> GATT <b>CAG</b> CAACACCA <b>AA</b> TCAAGAAGG          | 104 |
|               | *** * * * * * * * * *                                                                                    |     |

|               |                                                                |     |
|---------------|----------------------------------------------------------------|-----|
| <b>QCOXFp</b> | GCC <b>T</b> TTTTTAAACAGGTTTAGGA--TGTTT-----TTATCTAAGGGAAGTCCC | 129 |
|---------------|----------------------------------------------------------------|-----|

|        |                                                               |     |
|--------|---------------------------------------------------------------|-----|
| QCOXRp | TATTTTAGAATTACATGATAATATTATGTTTTATTTATTAGTTATTTTAGGTTTAGTATC  | 180 |
| COX2   | TATTTTAGAATTACATGATAATATTATGTTTTATTTATTAGTTATTTTAGGTTTAGTATC  | 164 |
|        | * * * * *                                                     |     |
| QCOXFp | TGGATTGCCCCGGCAACATGGATTATCTCAACCATGTCTTACCCCCCTCGTGTTCCAAC   | 189 |
| QCOXRp | TTGAATGTTATATA-----CAATTGTTATAACATATTCAAAAAATCCTATTGCATATAA   | 234 |
| COX2   | TTGAATGTTATATA-----CAATTGTTATAACATATTCAAAAAATCCTATTGCATATAA   | 218 |
|        | * * * * *                                                     |     |
| QCOXFp | GTGTCAACACCGCGTGTGACCCGTTGAAACATGAGTGAACCATCTATTA-----        | 239 |
| QCOXRp | ATATATT--AAACATGGACAAACTATTGAAGTTATTTGAACAATTTTCCAGCTGTAATT   | 292 |
| COX2   | ATATATT--AAACATGGACAAACTATTGAAGTTATTTGAACAATTTTCCAGCTGTAATT   | 276 |
|        | * * * * *                                                     |     |
| QCOXFp | CCAGTAGAGAACGTCCCTCGTGACTTCTCACAAATAATAGATGTGTTATCCTCGTTCCT   | 299 |
| QCOXRp | TTATTAATTATTGCTTTTCCTTCATTATTTTATTATATTTATGTGATGAAGTTATTTC    | 352 |
| COX2   | TTATTAATTATTGCTTTTCCTTCATTATTTTATTATATTTATGTGATGAAGTTATTTC    | 336 |
|        | * * * * *                                                     |     |
| QCOXFp | TCCTGAGAAATTTTTGTTAATATCCGATGAAAAATATTTTATTAT----CATAATCGGCC  | 355 |
| QCOXRp | CCAGCTATAACTATTAAAGCTATTGGATATCAATGATATTGAAAATATGAATATTCAGAT  | 412 |
| COX2   | CCAGCTATAACTATTAAAGCTATTGGATATCAATGATATTGAAAATATGAATATTCAGAT  | 396 |
|        | * * * * *                                                     |     |
| QCOXFp | TATGTTTATAATAATAATACCTGCGGACAGAGCTCCTCCCTTAGCTTCCTGATTGCTAT   | 415 |
| QCOXRp | TTTATTAATGATAGTGGTGAACTGTTGAATTTGAATCATATGTTATTCCTGATGAATTA   | 472 |
| COX2   | TTTATTAATGATAGTGGTGAACTGTTGAATTTGAATCATATGTTATTCCTGATGAATTA   | 456 |
|        | * * * * *                                                     |     |
| QCOXFp | GCTGAGAGAATCGAGTGTAGGTTATTTC AACCTGAAGACATGCTTCAAAAATCTGACAC  | 475 |
| QCOXRp | TTAGAAGAAGGTCAATTAAGATTATTAGATACTGATACTTCTATAGTTGTACCTGTAGAT  | 532 |
| COX2   | TTAGAAGAAGGTCAATTAAGATTATTAGATACTGATACTTCTATAGTTGTACCTGTAGAT  | 516 |
|        | * * * * *                                                     |     |
| QCOXFp | ACCGATGACCGATAATTTGAATCAGATGCTGGAGCTATAAATGAATATACTCTACCAGAT  | 535 |
| QCOXRp | ACACATATTAGATTCGTTGTAACAGCTGCTGATGTTATTCATGATTTTGCTATTCCAAGT  | 592 |
| COX2   | ACACATATTAGATTCGTTGTAACAGCTGCTGATGTTATTCATGATTTTGCTATTCCAAGT  | 576 |
|        | * * * * *                                                     |     |
| QCOXFp | GG-----                                                       | 537 |
| QCOXRp | TTAGGTATTAAAGTTGATGCTACTCCTGGTAGATTAAATCAAGTTTCTGCTTTAATTCAA  | 652 |
| COX2   | TTAGGTATTAAAGTTGATGCTACTCCTGGTAGATTAAATCAAGTTTCTGCTTTAATTCAA  | 636 |
|        |                                                               |     |
| QCOXFp | -----GAAAAAGGTACAACCTGAACG                                    | 558 |
| QCOXRp | AGAGAAGGTGTCTTCTATGGAGCATGTTCTGAGTTGTGTGGGACAGGTCATGCAAATATG  | 712 |
| COX2   | AGAGAAGGTGTCTTCTATGGAGCATGTTCTGAGTTGTGTGGGACAGGTCATGCAAATATG  | 696 |
|        | * * * * *                                                     |     |
| QCOXFp | GCAT-----TGCTGTATATAACGCTCCTCC-----                           | 584 |
| QCOXRp | CCCAATTAAGATCGAAGCCAGTATGATA-----                             | 740 |
| COX2   | CCCAATTAAGATCGAAGCAGTATCATTACCTAAATTTTGGGAATGATTAAATGAACAATAA | 756 |
|        | * * *                                                         |     |

## Hsp31

## RAD14

|         |                                                              |     |
|---------|--------------------------------------------------------------|-----|
| 31RADRp | -----                                                        | 0   |
| RAD14   | ATGACTCCCGAACAAAAGGCCAAACTAGTATGTGTGAAAATGATTCTGTGTTTGTATTTT | 60  |
| 31RADFp | -----TTTT                                                    | 4   |
|         |                                                              |     |
| 31RADRp | -----                                                        | 0   |
| RAD14   | AACCGTGGGTTTCTTTTACTAACAATTTAACGATGAGATGAGCTGTGCAGGAGGCTAAC  | 120 |
| 31RADFp | AACCGTGGGTTTCTTTTACTAACAATTTAACGATGAGATGAGCTGTGCAGGAGGCTAAC  | 64  |

|         |                                                                        |     |
|---------|------------------------------------------------------------------------|-----|
| 31RADRp | -----                                                                  | 0   |
| RAD14   | AGGAAATTAGCAATAGAACGGTTAAGAAAAAGGGGAATACTGAGTAGCGACCAATTGAAT           | 180 |
| 31RADFp | AGGAAATTAGCAATAGAACGGTTAAGAAAAAGGGGAATACTGAGTAGCGACCAATTGAAT           | 124 |
| 31RADRp | -----                                                                  | 0   |
| RAD14   | CGAATAGAAAGTAGGAATGAACCTTTAAAAACCCGGCCTCTCGCAGTTACTAGTGGCAGC           | 240 |
| 31RADFp | CGAATAGAAAGTAGGAATGAACCTTTAAAAACCCGGCCTCTCGCAGTTACTAGTGGCAGC           | 184 |
| 31RADRp | -----                                                                  | 0   |
| RAD14   | AATCGGGATGATAATGCAGCAGCCGCAGTACATGTGCCAATCATAATGGACAACCGTCT            | 300 |
| 31RADFp | AATCGGGATGATAATGCAGCAGCCGCAGTACATGTGCCAATCATAATGGACAACCGTCT            | 244 |
| 31RADRp | -----ACACTAACACTACTTCACTTTATGGTAGCGGAGTAGTTGATGGA                      | 44  |
| RAD14   | GCGCTTGCTAACACTAACACTAACACTACTTCACTTTATGGTAGCGGAGTAGTTGATGGA           | 360 |
| 31RADFp | GCGCTTGCTAACACTAACACTAACACTACTTCACTTTATGGTAGCGGAGTAGTTGATGGA<br>*****  | 304 |
| 31RADRp | AGTAAAAGGGATGCGTCGGTACTCGACAAAAGGCCAACGGATAGAATCAGACCTAGCATA           | 104 |
| RAD14   | AGTAAAAGGGATGCGTCGGTACTCGACAAAAGGCCAACGGATAGAATCAGACCTAGCATA           | 420 |
| 31RADFp | AGTAAAAGGGATGCGTCGGTACTCGACAAAAGGCCAACGGATAGAATCAGACCTAGCATA<br>*****  | 364 |
| 31RADRp | AGGAAACAAGATTACATTGAGTACGATTTTGCCACCATGCAGAACTTGAATGGTGGTTAT           | 164 |
| RAD14   | AGGAAACAAGATTACATTGAGTACGATTTTGCCACCATGCAGAACTTGAATGGTGGTTAT           | 480 |
| 31RADFp | AGGAAACAAGATTACATTGAGTACGATTTTGCCACCATGCAGAACTTGAATGGTGGTTAT<br>*****  | 424 |
| 31RADRp | ATCAACCCTAAGGACAAGCTTCCAAATTCTGACTTTACCGATGACCAAGAATTTGAATCT           | 224 |
| RAD14   | ATCAACCCTAAGGACAAGCTTCCAAATTCTGACTTTACCGATGACCAAGAATTTGAATCT           | 540 |
| 31RADFp | ATCAACCCTAAGGACAAGCTTCCAAATTCTGACTTTACCGATGACCAAGAATTTGAATCT<br>*****  | 484 |
| 31RADRp | GAGTTTGGATCTAAAAAGCAGAAGACACTACAGGACTGGAAAAAGGAACAACCTGAACGG           | 284 |
| RAD14   | GAGTTTGGATCTAAAAAGCAGAAGACACTACAGGACTGGAAAAAGGAACAACCTGAACGG           | 600 |
| 31RADFp | GAGTTTGGATCTAAAAAGCAGAAGACACTACAGGACTGGAAAAAGGAACAACCTGAACGG<br>*****  | 544 |
| 31RADRp | AAAATGCTGTACGAAAATGCACCTCCTCCAGAGCATATTTCAAAGGCGCCGAAATGTATT           | 344 |
| RAD14   | AAAATGCTGTACGAAAATGCACCTCCTCCAGAGCATATTTCAAAGGCGCCGAAATGTATT           | 660 |
| 31RADFp | AAAATGCTGTACGAAAATGCACCTCCTCCAGAGCATATTTCAAAGGCGCCGAAATGTATT<br>*****  | 604 |
| 31RADRp | GAATGTCATATTAATATTGAGATGGATCCTGTGCTACATGATGTGTTCAAGTTACAAGTT           | 404 |
| RAD14   | GAATGTCATATTAATATTGAGATGGATCCTGTGCTACATGATGTGTTCAAGTTACAAGTT           | 720 |
| 31RADFp | GAATGTCATATTAATATTGAGATGGATCCTGTGCTACATGATGTGTTCAAGTTACAAGTT<br>*****  | 664 |
| 31RADRp | TGTAAACAGTGTTCTAAGGAGCATCCAGAAAAGTATGCACTACTGACGAAAACAGAATGT           | 464 |
| RAD14   | TGTAAACAGTGTTCTAAGGAGCATCCAGAAAAGTATGCACTACTGACGAAAACAGAATGT           | 780 |
| 31RADFp | TGTAAACAGTGTTCTAAGGAGCATCCAGAAAAGTATGCACTACTGACGAAAACAGAATGT<br>*****  | 724 |
| 31RADRp | AAGGAAGATTACTTTTAAACAGACCCCGAATTGAATGATGAGGATCTCTTTCATAGACTA           | 524 |
| RAD14   | AAGGAAGATTACTTTTAAACAGACCCCGAATTGAATGATGAGGATCTCTTTCATAGACTA           | 840 |
| 31RADFp | AAGGAAGATTACTTTTAAACAGACCCCGAATTGAATGATGAGGATCTCTTTCATAGACTA<br>*****  | 784 |
| 31RADRp | GAAAAGCCGAACCCCTCATTCGGGGACATTTGCAAGAATGCAACTATTTGTTAGATGTGAA          | 584 |
| RAD14   | GAAAAGCCGAACCCCTCATTCGGGGACATTTGCAAGAATGCAACTATTTGTTAGATGTGAA          | 900 |
| 31RADFp | GAAAAGCCGAACCCCTCATTCGGGGACATTTGCAAGAATGCAACTATTTGTTAGATGTGAA<br>***** | 844 |
| 31RADRp | GTGGAAGCCTTTGCGTTCAAGAAATGGGGTGGGAAGAAGGTTTAGATGAGGAATGGCAA            | 644 |



|         |                                                                 |      |
|---------|-----------------------------------------------------------------|------|
| RAD14   | GTGGAAGCCTTTGCGTTCAAGAAATGGGGTGGGGAAGAAGGTTTAGATGAGGAATGGCAA    | 960  |
| 31RADFp | GTGGA-----                                                      | 849  |
|         | *****                                                           |      |
| 31RADRp | CGTCGTGAAGAAGGAAAGGCTCACAGAAGGGAGAAAAAATACGAAAAGAAAATCAAGGAA    | 704  |
| RAD14   | CGTCGTGAAGAAGGAAAGGCTCACAGAAGGGAGAAAAAATACGAAAAGAAAATCAAGGAA    | 1020 |
| 31RADFp | -----                                                           | 849  |
| 31RADRp | ATGCGACTGAAAACAAGAGCTCAAGAATATACTAATAGATTAAGGAAAAAGAAGCATGGG    | 764  |
| RAD14   | ATGCGACTGAAAACAAGAGCTCAAGAATATACTAATAGATTAAGGAAAAAGAAGCATGGG    | 1080 |
| 31RADFp | -----                                                           | 849  |
| 31RADRp | AAAGCCCATATTTCATCATTTTGTAGTGATCCAGTTGATGGAGGTATTGATGAAGACGGTTAT | 824  |
| RAD14   | AAAGCCCATATTTCATCATTTTGTAGTGATCCAGTTGATGGAGGTATTGATGAAGACGGTTAT | 1140 |
| 31RADFp | -----                                                           | 849  |
| 31RADRp | CAAATCAA-----                                                   | 832  |
| RAD14   | CAAATTCAAAGAAGAGATGTACAGACTGCGGGCTAGAAACTGAAGAAATTGACATTTAA     | 1200 |
| 31RADFp | -----                                                           | 849  |

## SOD1

|          |                                                                         |     |
|----------|-------------------------------------------------------------------------|-----|
| 31SOD1Rp | TCAAAGTTCAAAGAGTTCGAGTGTAAAGGGTGATGCCGGTGTCTCTGGTGTGTGTC                | 60  |
| SOD1     | ---ATGGTTCAAAGAGTTCGAGTGTAAAGGGTGATGCCGGTGTCTCTGGTGTGTGTC               | 57  |
| 31SOD1Fp | -----GTGAGCCGGGTGC--CTCTGGTGTGTGTC                                      | 27  |
|          | **** * **** ** ** *                                                     |     |
| 31SOD1Rp | TTCGAACAGGCTTCCGAATCCGAGCCAACCACTGTCTCTTACGAGATCGCTGGTAACAGT            | 120 |
| SOD1     | TTCGAACAGGCTTCCGAATCCGAGCCAACCACTGTCTCTTACGAGATCGCTGGTAACAGT            | 117 |
| 31SOD1Fp | GTCTAGAGGTTTCCAAAACAGAGCCAACCACTGTCTCTTACAAAATCGCTGGTAACAGT             | 87  |
|          | * * * * * * * * * * * * * * * * * * * * * * * * * * * * * * * * * * * * |     |
| 31SOD1Rp | CCTAACGCAGAACGTGGGTTCCACATTCATGAGTTTGGAGATGCCACCAATGGTTGTGTC            | 180 |
| SOD1     | CCTAACGCAGAACGTGGGTTCCACATTCATGAGTTTGGAGATGCCACCAATGGTTGTGTC            | 177 |
| 31SOD1Fp | CCTAACGCAAAACGGGGTTCCACATTCATGATTTTGGAAATGCCACCAAGGGTTGTGTC             | 147 |
|          | ***** * * * * * * * * * * * * * * * * * * * * * * * * * * * * * *       |     |
| 31SOD1Rp | TCTGCTGGTTCCTCACTTCAATCCTTTCAAGAAGACACATGGTGCTCCAACCTGACGAAGTC          | 240 |
| SOD1     | TCTGCTGGTTCCTCACTTCAATCCTTTCAAGAAGACACATGGTGCTCCAACCTGACGAAGTC          | 237 |
| 31SOD1Fp | TCTGCTGGTTCCTCACTTCAATCCTTTCAAAAAACACATGGGGCTCCAACCTGACAAATTC           | 207 |
|          | ***** * * * * * * * * * * * * * * * * * * * * * * * * * * * * * *       |     |
| 31SOD1Rp | AGACATGTCGGTGACATGGGTAACGTAAAGACGGACGAAAATGGTGTGGCCAAGGGCTCC            | 300 |
| SOD1     | AGACATGTCGGTGACATGGGTAACGTAAAGACGGACGAAAATGGTGTGGCCAAGGGCTCC            | 297 |
| 31SOD1Fp | AAACTTGTTCGGTGACATGGGTAACGTAAAGACGGACGAAAATGGTGTGGCCAAGGGCTCC           | 267 |
|          | * * * * * * * * * * * * * * * * * * * * * * * * * * * * * * * * * * * * |     |
| 31SOD1Rp | TTCAAGGACTCTTTGATCAAGCTTATCGGTCTACCTCCGTTGTAGGCAGAAGCGTCGTT             | 360 |
| SOD1     | TTCAAGGACTCTTTGATCAAGCTTATCGGTCTACCTCCGTTGTAGGCAGAAGCGTCGTT             | 357 |
| 31SOD1Fp | TTCAAGGACTCTTTGATCAAGCTTATCGGTCTACCTCCGTTGTAGGCAAAACCGTCTTT             | 327 |
|          | ***** * * * * * * * * * * * * * * * * * * * * * * * * * * * * * *       |     |
| 31SOD1Rp | ATCTCACGCCGGCCAAGATGACTTAGGTAATAGGTGATCACAGCAAGTACATCAGCAAGA            | 420 |
| SOD1     | ATCCACGCCGGCCA-AGATGACTTAGGTAAGGGTGACACTGAAGAATCTTTGAAGACTGG            | 416 |
| 31SOD1Fp | ATCCACCCCGGCCA-AAATGACTTAGGTAAGGGTGACACTGAAAAATCTTTGAAAACCTGG           | 386 |
|          | *** * * * * * * * * * * * * * * * * * * * * * * * * * * * * * *         |     |
| 31SOD1Rp | CTATGATAACGTACAGAATC-----                                               | 441 |
| SOD1     | TAATGCCGGTCCAAACACGCTGTGGTGTCATTGGTCTAACCAACTAA--                       | 465 |
| 31SOD1Fp | TAATGCCGGTCCAAACACCTGTGGTGTCATTGGTCTAACCAACTAAAA                        | 437 |
|          | *** * * * *                                                             |     |

## COX2

|         |                                                             |    |
|---------|-------------------------------------------------------------|----|
| 31COXRp | TTTTGTTTTTTTTTTATTTAGATTTATTAAGATTACAATTAACAACATTCATTATGAAT | 60 |
|---------|-------------------------------------------------------------|----|

|         |                                                                                                       |     |
|---------|-------------------------------------------------------------------------------------------------------|-----|
| 31COXFp | -----                                                                                                 | 0   |
| COX     | -----ATGTTAGATTATTAAGATTACAATTAACAACATTCATTATGAAT                                                     | 45  |
| 31COXRp | GATGTACCAACACCTTATGCATGTT-ATTTTCAGGATTCAGCAACACCAAATCAAGAAGG                                          | 119 |
| 31COXFp | ---TTACCAACACCTTATGCATGTTATTTTCAGGATTCAGCAACACCAAATCAAGAAGG                                           | 57  |
| COX     | GATGTACCAACACCTTATGCATGTT-ATTTTCAGGATTCAGCAACACCAAATCAAGAAGG<br>*****                                 | 104 |
| 31COXRp | TATTTTAGAATTACATGATAATATTATGTTTTATTTATTAGTTATCTTAGGTTTAGTATC                                          | 179 |
| 31COXFp | TATTTTAGAATTACATGATAATATTATGTTTTATTTATTAGTTATTTTAGGTTTAGTATC                                          | 117 |
| COX     | TATTTTAGAATTACATGATAATATTATGTTTTATTTATTAGTTATTTTAGGTTTAGTATC<br>*****                                 | 164 |
| 31COXRp | TTGAATGTTATATACAATTGTTATAACATATTCAAAAAATCCTATTGCATATAAATATAT                                          | 239 |
| 31COXFp | TTGAATGTTATATACAATTGTTATAACATATTCAAAAAATCCTATTGCATATAAATATAT                                          | 177 |
| COX     | TTGAATGTTATATACAATTGTTATAACATATTCAAAAAATCCTATTGCATATAAATATAT<br>*****                                 | 224 |
| 31COXRp | TAAACATGGACAACTATTGAAGTTATTTGAACAATTTTCCAGCTGTAATTTTATTAAT                                            | 299 |
| 31COXFp | TAAACATGGACAACTATTGAAGTTATTTGAACAATTTTCCAGCTGTAATTTTATTAAT                                            | 237 |
| COX     | TAAACATGGACAACTATTGAAGTTATTTGAACAATTTTCCAGCTGTAATTTTATTAAT<br>*****                                   | 284 |
| 31COXRp | TATTGCTTTTCCTTCATTTATTTTATTATATTTATGTGATGAAGTTATTTCCACCAGCTAT                                         | 359 |
| 31COXFp | TATTGCTTTTCCTTCATTTATTTTATTATATTTATGTGATGAAGTTATTTCCACCAGCTAT                                         | 297 |
| COX     | TATTGCTTTTCCTTCATTTATTTTATTATATTTATGTGATGAAGTTATTTCCACCAGCTAT<br>*****                                | 344 |
| 31COXRp | AAC TATTAAGCTATTGGATATCAATGATATTGAAAATATGAATATTCAGATTTTATTAA                                          | 419 |
| 31COXFp | AAC TATTAAGCTATTGGATATCAATGATATTGAAAATATGAATATTCACATTTTATTAA                                          | 357 |
| COX     | AAC TATTAAGCTATTGGATATCAATGATATTGAAAATATGAATATTCAGATTTTATTAA<br>*****                                 | 404 |
| 31COXRp | TGATAGTGGTGAACTGTTGAATTTGAATCATATGTTATTCCTGATGAATTATTAGAAGA                                           | 479 |
| 31COXFp | TGATAGTGGTGAACTGTTGAATTTGAATCATATGTTATTCCTGATGAATTATTAGAAGA                                           | 417 |
| COX     | TGATAGTGGTGAACTGTTGAATTTGAATCATATGTTATTCCTGATGAATTATTAGAAGA<br>*****                                  | 464 |
| 31COXRp | AGGTCAATTAAGATTATTAGATACTGATACTTCTATAGTTGTACCTGTAGATACACATAT                                          | 539 |
| 31COXFp | AGGTCAATTAAGATTATTACATACTGATACTTCGATAGTTGTACCTGTAGATACACATAT                                          | 477 |
| COX     | AGGTCAATTAAGATTATTAGATACTGATACTTCTATAGTTGTACCTGTAGATACACATAT<br>*****                                 | 524 |
| 31COXRp | CAGATTCGTTGTAACAGCTGCTGATGTTATTCATGATTTTGCTATTCCAAGTTTAGGTAT                                          | 599 |
| 31COXFp | TATATTCGTTGTAACAGCTGCTGATGTTATTCATGATTTTGCTATTCTAGTTTAGGTAT                                           | 537 |
| COX     | TAGATTCGTTGTAACAGCTGCTGATGTTATTCATGATTTTGCTATTCCAAGTTTAGGTAT<br>* *****:*****                         | 584 |
| 31COXRp | TAAAGTTGATGCTACTCCTGGTAGATTAAATCAAGTTTCTGCTTTAATTCAAAGAGAAGG                                          | 659 |
| 31COXFp | TACAGTAGACGCTACTCCAGGTAGATTAAATCAAGTTTCTGCTTTAATTCAGAGATTCTG                                          | 597 |
| COX     | TAAAGTTGATGCTACTCCTGGTAGATTAAATCAAGTTTCTGCTTTAATTCAAAGAGAAGG<br>**.**:*****:*****.**:.*               | 644 |
| 31COXRp | TGTCTTCTATGGAGCATGTTCTGAGTTGTGTGGGACAGGTCATGCAAATATGCCAATTA                                           | 719 |
| 31COXFp | TGTCTTCTACGTGACATGTTGTGACTTATGCCGGACAAGTCATGCAAATATGCGTTTAA                                           | 657 |
| COX     | TGTCTTCTATGGAGCATGTTCTGAGTTGTGTGGGACAGGTCATGCAAATATGCCAATTA<br>***** * .***** ** *.** *****:*****:*** | 704 |
| 31COXRp | AGATCGA-AGCAGTTCAT--CCTT-----                                                                         | 741 |
| 31COXFp | -CATCAATACCAGTATCATTACCTAAATTGTTGGAATGATATTGAAACAATAAAAAA                                             | 716 |
| COX     | -GATCGA-AGCAGTATCATTACCTAAATTGTTGGAATGATTAAATG-AACAATA-----<br>***.**:*****:                          | 756 |
| 31COXRp | -----                                                                                                 | 741 |
| 31COXFp | AAAAA                                                                                                 | 721 |
| COX     | -----                                                                                                 | 756 |

## Hsp32

### RAD14

|         |                                                                       |     |
|---------|-----------------------------------------------------------------------|-----|
| 32RADFp | -----TT                                                               | 2   |
| RAD14   | ATGACTCCCGAACAAAAGGCCAACTAGTATGTGTGAAAATGATTCTGTGTTTGTATTTT           | 60  |
| 32RADRp | -----                                                                 | 0   |
| 32RADFp | TACCGTGGGTTTCTTTTACTAACAATTTAACGATGAGATGAGCTGTGCAGGAGGCTAAC           | 62  |
| RAD14   | AACCGTGGGTTTCTTTTACTAACAATTTAACGATGAGATGAGCTGTGCAGGAGGCTAAC           | 120 |
| 32RADRp | -----                                                                 | 0   |
| 32RADFp | AGGAAATTAGCAATAGAACGGTTAAGAAAAAGGGGAATACTGAGTAGCGACCAATTGAAT          | 122 |
| RAD14   | AGGAAATTAGCAATAGAACGGTTAAGAAAAAGGGGAATACTGAGTAGCGACCAATTGAAT          | 180 |
| 32RADRp | -----                                                                 | 0   |
| 32RADFp | CGAATAGAAAAGTAGGAATGAACCTTTAAAAACCCGGCCTCTCGCAGTTACTAGTGGCAGC         | 182 |
| RAD14   | CGAATAGAAAAGTAGGAATGAACCTTTAAAAACCCGGCCTCTCGCAGTTACTAGTGGCAGC         | 240 |
| 32RADRp | -----                                                                 | 0   |
| 32RADFp | AATCGGGATGATAATGCAGCAGCCGCAGTACATGTGCCAAATCATAATGGACAACCGTCT          | 242 |
| RAD14   | AATCGGGATGATAATGCAGCAGCCGCAGTACATGTGCCAAATCATAATGGACAACCGTCT          | 300 |
| 32RADRp | --TCGGGATGATAATGCAGCAGCCGCAGTACATGTGCCAAATCATAATGGACAACCGTCT<br>***** | 58  |
| 32RADFp | GCGCTTGCTAACACTAACACTAACTACTTCACTTTATGGTAGCGGAGTAGTTGATGGA            | 302 |
| RAD14   | GCGCTTGCTAACACTAACACTAACTACTTCACTTTATGGTAGCGGAGTAGTTGATGGA            | 360 |
| 32RADRp | GCGCTTGCTAACACTAACACTAACTACTTCACTTTATGGTAGCGGAGTAGTTGATGGA<br>*****   | 118 |
| 32RADFp | AGTAAAAGGGATGCGTCGGTACTCGACAAAAGGCCAACGGATAGAATCAGACCTAGCATA          | 362 |
| RAD14   | AGTAAAAGGGATGCGTCGGTACTCGACAAAAGGCCAACGGATAGAATCAGACCTAGCATA          | 420 |
| 32RADRp | AGTAAAAGGGATGCGTCGGTACTCGACAAAAGGCCAACGGATAGAATCAGACCTAGCATA<br>***** | 178 |
| 32RADFp | AGGAAACAAGATTACATTGAGTACGATTTTGCCACCATGCAGAACTTGAATGGTGGTTAT          | 422 |
| RAD14   | AGGAAACAAGATTACATTGAGTACGATTTTGCCACCATGCAGAACTTGAATGGTGGTTAT          | 480 |
| 32RADRp | AGGAAACAAGATTACATTGAGTACGATTTTGCCACCATGCAGAACTTGAATGGTGGTTAT<br>***** | 238 |
| 32RADFp | ATCAACCCTAAGGACAAGCTTCCAAATTCTGACTTTACCGATGACCAAGAATTTGAATCT          | 482 |
| RAD14   | ATCAACCCTAAGGACAAGCTTCCAAATTCTGACTTTACCGATGACCAAGAATTTGAATCT          | 540 |
| 32RADRp | ATCAACCCTAAGGACAAGCTTCCAAATTCTGACTTTACCGATGACCAAGAATTTGAATCT<br>***** | 298 |
| 32RADFp | GAGTTTGGATCTAAAAAGCAGAAGACACTACAGGACTGGAAAAAGGAACAACCTGAACGG          | 542 |
| RAD14   | GAGTTTGGATCTAAAAAGCAGAAGACACTACAGGACTGGAAAAAGGAACAACCTGAACGG          | 600 |
| 32RADRp | GAGTTTGGATCTAAAAAGCAGAAGACACTACAGGACTGGAAAAAGGAACAACCTGAACGG<br>***** | 358 |
| 32RADFp | AAAATGCTGTACGAAAATGCACCTCCTCCAGAGCATATTTCAAAGGCGCCGAAATGTATT          | 602 |
| RAD14   | AAAATGCTGTACGAAAATGCACCTCCTCCAGAGCATATTTCAAAGGCGCCGAAATGTATT          | 660 |
| 32RADRp | AAAATGCTGTACGAAAATGCACCTCCTCCAGAGCATATTTCAAAGGCGCCGAAATGTATT<br>***** | 418 |
| 32RADFp | GAATGTCATATTAATATTGAGATGGATCCTGTGCTACATGATGTGTTCAAGTTACAAGTT          | 662 |
| RAD14   | GAATGTCATATTAATATTGAGATGGATCCTGTGCTACATGATGTGTTCAAGTTACAAGTT          | 720 |
| 32RADRp | GAATGTCATATTAATATTGAGATGGATCCTGTGCTACATGATGTGTTCAAGTTACAAGTT<br>***** | 478 |
| 32RADFp | TGTAAACAGTGTTCTAAGGAGCATCCAGAAAAGTATGCACTACTGACGAATACAGAATGT          | 722 |
| RAD14   | TGTAAACAGTGTTCTAAGGAGCATCCAGAAAAGTATGCACTACTGACGAATACAGAATGT          | 780 |

|             |                                                                           |      |
|-------------|---------------------------------------------------------------------------|------|
| 32RADRp     | TGTAAACAGTGTTCCTAAGGAGCATCCAGAAAAGTATGCACTACTGACGAAAACAGAATGT<br>*****    | 538  |
| 32RADFp     | AAGGAAGATTACTTTTAAACAGACCCCGAATTGAATGATGAGGATCTCTTTCATAGACTA              | 782  |
| RAD14       | AAGGAAGATTACTTTTAAACAGACCCCGAATTGAATGATGAGGATCTCTTTCATAGACTA              | 840  |
| 32RADRp     | AAGGAAGATTACTTTTAAACAGACCCCGAATTGAATGATGAGGATCTCTTTCATAGACTA<br>*****     | 598  |
| 32RADFp     | GAAAAGCCGAACCCTCATTCGGGGACATTTGCAAGAATGCAACTATTTGTTAGATGTGAA              | 842  |
| RAD14       | GAAAAGCCGAACCCTCATTCGGGGACATTTGCAAGAATGCAACTATTTGTTAGATGTGAA              | 900  |
| 32RADRp     | GAAAAGCCGAACCCTCATTCGGGGACATTTGCAAGAATGCAACTATTTGTTAGATGTGAA<br>*****     | 658  |
| 32RADFp     | GTGGAAGCCTTTGCGTTC-----                                                   | 860  |
| RAD14       | GTGGAAGCCTTTGCGTTCAAGAAATGGGGTGGGGAAGAAGGTTTAGATGAGGAATGGCAA              | 960  |
| 32RADRp     | GTGGAAGCCTTTGCGTTCAAGAAATGGGGTGGGGAAGAAGGTTTAGATGAGGAATGGCAA<br>*****     | 718  |
| 32RADFp     | -----                                                                     | 860  |
| RAD14       | CGTCGTGAAGAAGGAAAGGCTCACAGAAGGGAGAAAAAATACGAAAAGAAAATCAAGGAA              | 1020 |
| 32RADRp     | CGTCGTGAAGAAGGAAAGGCTCACAGAAGGGAGAAAAAATACGAAAAGAAAATCAAGGAA              | 778  |
| 32RADFp     | -----                                                                     | 860  |
| RAD14       | ATGCGACTGAAAACAAGAGCTCAAGAATATACTAATAGATTAAGGAAAAAGAAGCATGGG              | 1080 |
| 32RADRp     | ATGCGACTGAAAACAAGAGCTCAAGAATATACTAATAGATTAAGGAAAAAGAAGCATGGG              | 838  |
| 32RADFp     | -----                                                                     | 860  |
| RAD14       | AAAGCCCATATTCATCATTTTAGTGATCCAGTTGATGGAGGTATTGATGAAGACGGTTAT              | 1140 |
| 32RADRp     | AAAGCCCATATTCATCATTTTAGTGATCCAGTTGATGGAGGTATTGATGAAGACGGT---              | 895  |
| 32RADFp     | -----                                                                     | 860  |
| RAD14       | CAAATTCAAAGAAGAAGATGTACAGACTGCGGGCTAGAACTGAAGAAATTGACATTTAA               | 1200 |
| 32RADRp     | -----                                                                     | 895  |
| <b>SOD1</b> |                                                                           |      |
| 32SOD1Fp    | -----ACTTAGCTGGTGACTCTGGTGTGTGG                                           | 26   |
| SOD1        | ---ATGGTCAAGCAGTCGCAGTGTTAAAGGGTGATGCCGGTGTCTCTGGTGTGTGCAAG               | 57   |
| 32SOD1Rp    | TTAATGTTCAAGGAGTCGCAGTGTTAAAGGGTGATGCCGGTGTCTCTGGTGTGTGCAAG<br>* * * * *  | 60   |
| 32SOD1Fp    | GTTCTAGAGGTTTCCAAAACAGAGCCAACCACTGTCTCTTACAAAATCGCTGGTAACAGT              | 86   |
| SOD1        | TTCGAACAGGCTTCCGAATCCGAGCCAACCACTGTCTCTTACGAGATCGCTGGTAACAGT              | 117  |
| 32SOD1Rp    | TTCGAACAGGCTTCCGAATCCGAGCCAACCACTGTCTCTTACGAGATCGCTGGTAACAGT<br>* * * * * | 120  |
| 32SOD1Fp    | CCTAACGCAAAACGGGGGTTCACATTCATGATTTTGAAATGCCACCAAGGGTTGTGTC                | 146  |
| SOD1        | CCTAACGCAGAACGTGGGTTCACATTCATGAGTTTGAGATGCCACCAATGGTTGTGTC                | 177  |
| 32SOD1Rp    | CCTAACGCAGAACGTGGGTTCACATTCATGAGTTTGAGATGCCACCAATGGTTGTGTC<br>*****       | 180  |
| 32SOD1Fp    | TCTGCTGGTCCCTCACTTCAATCCTTTCAAAAAACACATGGGGCTCCAACCTGACAAATTC             | 206  |
| SOD1        | TCTGCTGGTCCCTCACTTCAATCCTTTCAAGAAGACACATGGTGCTCCAACCTGACGAAGTC            | 237  |
| 32SOD1Rp    | TCTGCTGGTCCCTCACTTCAATCCTTTCAAGAAGACACATGGTGCTCCAACCTGACGAAGTC<br>*****   | 240  |
| 32SOD1Fp    | AAACTTGTCGGTGACATGGGTAACGTAAAAACGGACAAAAATGGTGTGGCCAAGGGCTCC              | 266  |
| SOD1        | AGACATGTCGGTGACATGGGTAACGTAAAGACGGACGAAAAATGGTGTGGCCAAGGGCTCC             | 297  |
| 32SOD1Rp    | AGACATGTCGGTGACATGGGTAACGTAAAGACGGACGAAAAATGGTGTGGCCAAGGGCTCC<br>* * *    | 300  |
| 32SOD1Fp    | TTCAAGGACTCTTTGATCAAGCTTATCGGTCTACCTCCGTTGTAGGCAAAACCGTCTTT               | 326  |
| SOD1        | TTCAAGGACTCTTTGATCAAGCTTATCGGTCTACCTCCGTTGTAGGCAGAAGCGTCGTT               | 357  |

|          |                                                             |     |
|----------|-------------------------------------------------------------|-----|
| 32SOD1Rp | TTCAAGGACTCTTTGATCAAGCTTATCGGTCTACCTCCGTTGTAGGCAGAAGCGTCGTT | 360 |
|          | *****                                                       |     |
| 32SOD1Fp | ATCCCCCGGCCAAAATGACTTAGGTAAGGGTGACACTGAA                    | 386 |
| SOD1     | ATCCACGCCGGCCAAGATGACTTAGGTAAGGGTGACACTGAA                  | 417 |
| 32SOD1Rp | ATCCACGCCGGCCAAGATGACTTAGGTAAGGGTGACACTCAG                  | 420 |
|          | *****                                                       |     |
| 32SOD1Fp | AATGCCGGTCCAA                                               | 436 |
| SOD1     | AATGCCGGTCCAA                                               | 465 |
| 32SOD1Rp | ATG-CCGTCCATG                                               | 438 |
|          | *      ***      *                                           |     |

## COX2

|         |                                                                |     |
|---------|----------------------------------------------------------------|-----|
| 32COXFp | -----AAATTCTTATGA                                              | 12  |
| COX     | -----ATGTTAGATTATTAAGATTACAATTAACAACATTCATTATGA                | 43  |
| 32COXRp | TTTTGTTTTTTTTTAAATGTTAGATTATTAAGATTACAATTAACAACATTCATTATGA     | 60  |
|         | .*:.******                                                     |     |
| 32COXFp | ATGATGTACCAACACCTTATGCATGTTATTTTCAGGATTCAGCAACACCAAATCAAGAAG   | 72  |
| COX     | ATGATGTACCAACACCTTATGCATGTTATTTTCAGGATTCAGCAACACCAAATCAAGAAG   | 103 |
| 32COXRp | ATGATGTACCAACACCTTATGCATGTTATTTTCAGGATTCAGCAACACCAAATCAAGAAG   | 120 |
|         | *****                                                          |     |
| 32COXFp | GTATTTTAGAATTACATGATAATATTATGTTTTATTATTAGTTATTTTAGGTTTAGTAT    | 132 |
| COX     | GTATTTTAGAATTACATGATAATATTATGTTTTATTATTAGTTATTTTAGGTTTAGTAT    | 163 |
| 32COXRp | GTATTTTAGAATTACATGATAATATTATGTTTTATTATTAGTTATCTTAGGTTTAGTAT    | 180 |
|         | *****                                                          |     |
| 32COXFp | CTTGAATGTTATATACAATTGTTATAACATATTCAAAAAATCCTATTGCATATAAATATA   | 192 |
| COX     | CTTGAATGTTATATACAATTGTTATAACATATTCAAAAAATCCTATTGCATATAAATATA   | 223 |
| 32COXRp | CTTGAATGTTATATACAATTGTTATAACATATTCAAAAAATCCTATTGCATATAAATATA   | 240 |
|         | *****                                                          |     |
| 32COXFp | TTAAACATGGACAACTATTGAAGTTATTTGAACAATTTTCCAGCTGTAATTTTATTAA     | 252 |
| COX     | TTAAACATGGACAACTATTGAAGTTATTTGAACAATTTTCCAGCTGTAATTTTATTAA     | 283 |
| 32COXRp | TTAAACATGGACAACTATTGAAGTTATTTGAACAATTTTCCAGCTGTAATTTTATTAA     | 300 |
|         | *****                                                          |     |
| 32COXFp | TTATTGCTTTTCCTTCATTTATTTTATTATATTTATGTGATGAAGTTATTTACCAGCTA    | 312 |
| COX     | TTATTGCTTTTCCTTCATTTATTTTATTATATTTATGTGATGAAGTTATTTACCAGCTA    | 343 |
| 32COXRp | TTATTGCTTTTCCTTCATTTATTTTATTATATTTATGTGATGAAGTTATTTACCAGCTA    | 360 |
|         | *****                                                          |     |
| 32COXFp | TAACATTTAAAGCTATTGGATATCAATGATATTGAAAATATGAATATTCAGATTTTATTA   | 372 |
| COX     | TAACATTTAAAGCTATTGGATATCAATGATATTGAAAATATGAATATTCAGATTTTATTA   | 403 |
| 32COXRp | TAACATTTAAAGCTATTGGATATCAATGATATTGAAAATATGAATATTCAGATTTTATTA   | 420 |
|         | *****                                                          |     |
| 32COXFp | ATGATAGTGGTGAACTGTTGAATTGAATCATATGTTATTCCTGATGAATTATTAGAAG     | 432 |
| COX     | ATGATAGTGGTGAACTGTTGAATTGAATCATATGTTATTCCTGATGAATTATTAGAAG     | 463 |
| 32COXRp | ATGATAGTGGTGAACTGTTGAATTGAATCATATGTTATTCCTGATGAATTATTAGAAG     | 480 |
|         | *****                                                          |     |
| 32COXFp | AACGTCAATTAAGATTATTACATACGGATACTTCGATAGTTGTACCTGTATATACTCTTA   | 492 |
| COX     | AAGGTCAATTAAGATTATTAGATACTGATACTTCTATAGTTGTACCTGTAGATACACATA   | 523 |
| 32COXRp | AAGGTCAATTAAGATTATTAGATACTGATACTTCTATAGTTGTACCTGTAGATACACATA   | 540 |
|         | ** *****                                                       |     |
| 32COXFp | TTGTATTTCGTTGTAACAGCTGCTGAGGTTATTCGAGAAATTTGCTATTCCCTGTTTATGTA | 552 |
| COX     | TTAGATTTCGTTGTAACAGCTGCTGATGTTATTCATGATTTTGCTATTCCAAGTTTAGGTA  | 583 |
| 32COXRp | TTAGATTTCGTTGTAACAGCTGCTGATGTTATTCATGATTTTGCTATTCCAAGTTTAGGTA  | 600 |
|         | ** . *****                                                     |     |
| 32COXFp | TTTCAGTAGACGCTACTCCAGGTAAATTAATCTAGTTTCTGCTTTTATTCTGAGATTCT    | 612 |
| COX     | TTAAAGTTGATGCTACTCCTGGTAGATTAAATCAAGTTTCTGCTTTAATTCAAAGAGAAG   | 643 |

|         |                                                                                                                     |     |
|---------|---------------------------------------------------------------------------------------------------------------------|-----|
| 32COXRp | TTAAAGTTGATGCTACTCCTGGTAGATTAAATCAAGTTTCTGCTTTAATTCAAAGAGAAG<br>**:.***:*** *****:****.*****:*****:***:.            | 660 |
| 32COXFp | GTGTCACCTTCGTGACTTGTGTGTTACTGAAGCCTGACAAGAACATGCATATATGCGTTG                                                        | 672 |
| COX     | GTGTCTTCTATGGAGCATGTTCTGAGTTGTGTGGGA-CAGGTCATGCAAATATGCCAAT                                                         | 701 |
| 32COXRp | GTGTCTTCTATGGAGCATGTTCTGAGTTGTGTGGGA-CAGGTCATGCAAATATGCCAAT<br>*****: **: * .*:**** * * * .:* ** .**.:*****:***** : | 719 |
| 32COXFp | TAACATCATTACAGTATCATGTTCTAAATTGTTGTCTTGATTAATCGAACCATAAAAA                                                          | 732 |
| COX     | TAAGATCGAAGCAGTATCATTACCTAAATTTTGGAAATGATTAAATGAACAATAA---                                                          | 756 |
| 32COXRp | TAAGATCGAATGCAGTTTCCATA-CAATT-----<br>*** ***.: .****:*.: : *.::                                                    | 747 |
| 32COXFp | AAAAAAAAAA 743                                                                                                      |     |
| COX     | ----- 756                                                                                                           |     |
| 32COXRp | ----- 747                                                                                                           |     |

## HSP33

### RAD14

|         |                                                                       |     |
|---------|-----------------------------------------------------------------------|-----|
| 33RADRp | -----                                                                 | 0   |
| RAD14   | ATGACTCCCGAACAAAAGGCCAAACTAGTATGTGTGAAAATGATTCTGTGTTTGTATTTT          | 60  |
| 33RADFp | -----                                                                 | 0   |
| 33RADRp | -----                                                                 | 0   |
| RAD14   | AACCGTGGGTTTCTTTTACTAACAATTTAACGATGAGATGAGCTGTGCAGGAGGCTAAC           | 120 |
| 33RADFp | --CCGTGGGTTTCTTTTACTAACAATTTAACGATGAGATGAGCTGTGCAGGAGGCTAAC           | 58  |
| 33RADRp | -----                                                                 | 0   |
| RAD14   | AGGAAATTAGCAATAGAACGGTTAAGAAAAGGGGAATACTGAGTAGCGACCAATTGAAT           | 180 |
| 33RADFp | AGGAAATTAGCAATAGAACGGTTAAGAAAAGGGGAATACTGAGTAGCGACCAATTGAAT           | 118 |
| 33RADRp | -----                                                                 | 0   |
| RAD14   | CGAATAGAAAGTAGGAATGAACCTTTAAAAACCCGGCCTCTCGCAGTTACTAGTGGCAGC          | 240 |
| 33RADFp | CGAATAGAAAGTAGGAATGAACCTTTAAAAACCCGGCCTCTCGCAGTTACTAGTGGCAGC          | 178 |
| 33RADRp | -----                                                                 | 0   |
| RAD14   | AATCGGGATGATAATGCAGCAGCCGCAGTACATGTGCCAAATCATAATGGACAACCGTCT          | 300 |
| 33RADFp | AATCGGGATGATAATGCAGCAGCCGCAGTACATGTGCCAAATCATAATGGACAACCGTCT          | 238 |
| 33RADRp | -----TACTTCACTTTATGGTAGCGGAGT-AGTGATGGA                               | 33  |
| RAD14   | GCGCTTGCTAACACTAACCTAACCTACTTCACTTTATGGTAGCGGAGTAGTTGATGGA            | 360 |
| 33RADFp | GCGCTTGCTAACACTAACCTAACCTACTTCACTTTATGGTAGCGGAGTAGTTGATGGA<br>*****   | 298 |
| 33RADRp | AGTAAAAGGGATGTGTCGGTACTCGACAAAAGGCCAACGGATAGAATCAGACCTAGCATA          | 93  |
| RAD14   | AGTAAAAGGGATGCGTCGGTACTCGACAAAAGGCCAACGGATAGAATCAGACCTAGCATA          | 420 |
| 33RADFp | AGTAAAAGGGATGCGTCGGTACTCGACAAAAGGCCAACGGATAGAATCAGACCTAGCATA<br>***** | 358 |
| 33RADRp | AGGAAACAAGATTACATTGAGTACGATTTTGCCACCATGCAGAACTTGAATGGTGGTTAT          | 153 |
| RAD14   | AGGAAACAAGATTACATTGAGTACGATTTTGCCACCATGCAGAACTTGAATGGTGGTTAT          | 480 |
| 33RADFp | AGGAAACAAGATTACATTGAGTACGATTTTGCCACCATGCAGAACTTGAATGGTGGTTAT<br>***** | 418 |
| 33RADRp | ATCAACCCTAAGGACAAGCTTCCAAATTCTGACTTTACCGATGACCAAGAATTTGAATCT          | 213 |
| RAD14   | ATCAACCCTAAGGACAAGCTTCCAAATTCTGACTTTACCGATGACCAAGAATTTGAATCT          | 540 |
| 33RADFp | ATCAACCCTAAGGACAAGCTTCCAAATTCTGACTTTACCGATGACCAAGAATTTGAATCT<br>***** | 478 |
| 33RADRp | GAGTTTGGATCTAAAAAGCAGAAGACACTACAGGACTGGAAAAGGAACAACCTGAACGG           | 273 |



|          |                                                                         |     |
|----------|-------------------------------------------------------------------------|-----|
| 33SOD1Rp | CCTAACGCAGAACGTGGGTTCCACATTCATGAGTTTGGAGATGCCACCAATGGTTGTGTC<br>*****   | 180 |
| 33SOD1Fp | TCTGCTGGTCCTCACTTCAATCCTTTCAAGAAAACACATGGGGCTCCAACCTGACAAATTC           | 207 |
| SOD1     | TCTGCTGGTCCTCACTTCAATCCTTTCAAGAAAGACACATGGTGCTCCAACCTGACGAAGTC          | 237 |
| 33SOD1Rp | TCTGCTGGTCCTCACTTCAATCCTTTCAAGAAAGACACATGGTGCTCCAACCTGACGAAGTC<br>***** | 240 |
| 33SOD1Fp | AAACATGTCGGTGACATGGGTAACGTAAAGACGGACAAAAATGGTGTGGCCAAGGGCTCC            | 267 |
| SOD1     | AGACATGTCGGTGACATGGGTAACGTAAAGACGGACGAAAATGGTGTGGCCAAGGGCTCC            | 297 |
| 33SOD1Rp | AGACATGTCGGTGACATGGGTAACGTAAAGACGGACGAAAATGGTGTGGCCAAGGGCTCC<br>* ***** | 300 |
| 33SOD1Fp | TTCAAGGACTCTTTGATCAAGCTTATCGGTCTACCTCCGTTGTAGGCAAAAGCGTCTTT             | 327 |
| SOD1     | TTCAAGGACTCTTTGATCAAGCTTATCGGTCTACCTCCGTTGTAGGCAGAAGCGTCGTT             | 357 |
| 33SOD1Rp | TTCAAGGACTCTTTGATCAAGCTTATCGGTCTACCTCCGTTGTAGGCAGAAGCGTCGTT<br>*****    | 360 |
| 33SOD1Fp | ATCCCCCGGCCAAAATGACTTAGGTAAGGGTGACACTGAAATCTTTGAACTGGT                  | 387 |
| SOD1     | ATCCACGCCGGCCAAGATGACTTAGGTAAGGGTGACACTGAAATCTTTGAACTGGT                | 417 |
| 33SOD1Rp | ATCCACGCCGGCCAAGATGACTTAGGTAATAGTGTATCTAGCAGTACATAGGAAG<br>*** * *****  | 420 |
| 33SOD1Fp | AATGCCGGTCCAAGACCAGCCTGTGGTGTCTATGGTCAAACAAAAAAAAA                      | 438 |
| SOD1     | AATGCCGGTCCAAGACCAGCCTGTGGTGTCTATGGTCTAACCAACTAA---                     | 465 |
| 33SOD1Rp | AACGGTGATAAAGTGTGATGACTGC-----<br>** * * * *                            | 445 |

## COX2

|         |                                                                         |     |
|---------|-------------------------------------------------------------------------|-----|
| 33CoxFp | -----AC                                                                 | 2   |
| Cox2    | -----ATGTTAGATTTATTAAGATTACAATTAACAACATTCATTATGAATGATGTAC               | 52  |
| 33CoxRp | TTTTTATTATGTTAGATTTATTAAGATTACAATTAACAACATTCATTATGAATGATGTAC<br>**      | 60  |
| 33CoxFp | AACACCTTATGCATGTTTATTTTCAGGATTTCAGCAACACCAAATCAAGAAGGTATTTTAG           | 62  |
| Cox2    | CAACACCTTATGCATGTTTATTTTCAGGATTTCAGCAACACCAAATCAAGAAGGTATTTTAG          | 112 |
| 33CoxRp | CAACACCTTATGCATGTTTATTTTCAGGATTTCAGCAACACCAAATCAAGAAGGTATTTTAG<br>* * * | 120 |
| 33CoxFp | AATTACATGATAATATTATGTTTTATTATTAGTTATTTTAGGTTTAGTATCTTGAATGT             | 122 |
| Cox2    | AATTACATGATAATATTATGTTTTATTATTAGTTATTTTAGGTTTAGTATCTTGAATGT             | 172 |
| 33CoxRp | AATTACATGATAATATTATGTTTTATTATTAGTTATTTTAGGTTTAGTATCTTGAATGT<br>*****    | 180 |
| 33CoxFp | TATATACAATTGTTATAACATATTCAAAAATCCTATTGCATATAAATATATTAAACATG             | 182 |
| Cox2    | TATATACAATTGTTATAACATATTCAAAAATCCTATTGCATATAAATATATTAAACATG             | 232 |
| 33CoxRp | TATATACAATTGTTATAACATATTCAAAAATCCTATTGCATATAAATATATTAAACATG<br>*****    | 240 |
| 33CoxFp | GACAAACTATTGAAGTTATTTGAACAATTTTTCAGCTGTAATTTTATTAATTATTGCTT             | 242 |
| Cox2    | GACAAACTATTGAAGTTATTTGAACAATTTTTCAGCTGTAATTTTATTAATTATTGCTT             | 292 |
| 33CoxRp | GACAAACTATTGAAGTTATTTGAACAATTTTTCAGCTGTAATTTTATTAATTATTGCTT<br>*****    | 300 |
| 33CoxFp | TTCCTTCATTTATTTTATTATATTTATGTGATGAAGTTATTTACCAGCTATAACTATTA             | 302 |
| Cox2    | TTCCTTCATTTATTTTATTATATTTATGTGATGAAGTTATTTACCAGCTATAACTATTA             | 352 |
| 33CoxRp | TTCCTTCATTTATTTTATTATATTTATGTGATGAAGTTATTTACCAGCTATAACTATTA<br>*****    | 360 |
| 33CoxFp | AAGCTATTGGATATCAATGATATTGAAAATATGAATATTCAGATTTTATTAATGATAGTG            | 362 |
| Cox2    | AAGCTATTGGATATCAATGATATTGAAAATATGAATATTCAGATTTTATTAATGATAGTG            | 412 |
| 33CoxRp | AAGCTATTGGATATCAATGATATTGAAAATATGAATATTCAGATTTTATTAATGATAGTG<br>*****   | 420 |
| 33CoxFp | GTGAAACTGTTGAATTTGAATCATATGTTATTCCTGATGAATTATTAGAAGAAGGTCAAT            | 422 |
| Cox2    | GTGAAACTGTTGAATTTGAATCATATGTTATTCCTGATGAATTATTAGAAGAAGGTCAAT            | 472 |



|         |                                                                          |     |
|---------|--------------------------------------------------------------------------|-----|
| 33CoxRp | GTGAAACTGTTGAATTTGAATCATATGTTATTCCTGATGAATTATTAGAAGAAGGTCAAT<br>*****    | 480 |
| 33CoxFp | TAAGATTATTAGATACTGATACTTCTATAGTTGTACCTGTAGATACACATATTAGATTCTG            | 482 |
| Cox2    | TAAGATTATTAGATACTGATACTTCTATAGTTGTACCTGTAGATACACATATTAGATTCTG            | 532 |
| 33CoxRp | TAAGATTATTAGATACTGATACTTCTATAGTTGTACCTGTAGATACACATATTAGATTCTG<br>*****   | 540 |
| 33CoxFp | TTGTAACAGCTGCTGATGTTATTCATGATTTTGCTATTCCAAGTTTAGGTATTAAAGTTG             | 542 |
| Cox2    | TTGTAACAGCTGCTGATGTTATTCATGATTTTGCTATTCCAAGTTTAGGTATTAAAGTTG             | 592 |
| 33CoxRp | TTGTAACAGCTGCTGATGTTATTCATGATTTTGCTATTCCAAGTTTAGGTATTAAAGTTG<br>*****    | 600 |
| 33CoxFp | ATGCTACTCCTGGTAGATTAAATCAAGTTTCTGCCTTAATTCAGAGAGAAGGTGTCCTTCT            | 602 |
| Cox2    | ATGCTACTCCTGGTAGATTAAATCAAGTTTCTGCCTTAATTCAGAGAGAAGGTGTCCTTCT            | 652 |
| 33CoxRp | ATGCTACTCCTGGTAGATTAAATCAAGTTTCTGCCTTAATTCAGAGAGAAGGTGTCCTTCT<br>*****   | 660 |
| 33CoxFp | ATGGAGCATGTTCTGAGTTGTGTGGGACAGGTCATGCAAATATGCCAATTAAATCGAAG              | 662 |
| Cox2    | ATGGAGCATGTTCTGAGTTGTGTGGGACAGGTCATGCAAATATGCCAATTAAATCGAAG              | 712 |
| 33CoxRp | ATGGAGCATGTTCTGAGTTGTGTGGGACAGGTCATGCAAATATGCCAATTAAAGATA--<br>***** * * | 718 |
| 33CoxFp | CAGTATCATTACCTAAATTCTTGAATGATTAAATGACATAAAAAAAAA                         | 712 |
| Cox2    | CAGTATCATTACCTAAATTCTTGAATGATTAAATGACATAA-----                           | 756 |
| 33CoxRp | -----                                                                    | 718 |

## HSP34

### RAD14

|         |                                                                       |     |
|---------|-----------------------------------------------------------------------|-----|
| 34RADRp | -----                                                                 | 0   |
| RAD14   | ATGACTCCCGAACAAAAGGCCAAACTAGTATGTGTGAAAATGATTCTGTGTTTGTATTTT          | 60  |
| 34RADFp | -----TTTT                                                             | 4   |
| 34RADRp | -----                                                                 | 0   |
| RAD14   | AACCGTGGGTTTCTTTTACTAACAATTTAACGATGAGATGAGCTGTGCAGGAGGCTAAC           | 120 |
| 34RADFp | AACCGTGGGTTTCTTTTACTAACAATTTAACGATGAGATGAGCTGTGCAGGAGGCTAAC           | 64  |
| 34RADRp | -----                                                                 | 0   |
| RAD14   | AGGAAATTAGCAATAGAACGGTTAAGAAAAAGGGGAATACTGAGTAGCGACCAATTGAAT          | 180 |
| 34RADFp | AGGAAATTAGCAATAGAACGGTTAAGAAAAAGGGGAATACTGAGTAGCGACCAATTGAAT          | 124 |
| 34RADRp | -----                                                                 | 0   |
| RAD14   | CGAATAGAAAGTAGGAATGAACCTTTAAAAACCCGGCCTCTCGCAGTTACTAGTGGCAGC          | 240 |
| 34RADFp | CGAATAGAAAGTAGGAATGAACCTTTAAAAACCCGGCCTCTCGCAGTTACTAGTGGCAGC          | 184 |
| 34RADRp | -----                                                                 | 0   |
| RAD14   | AATCGGGATGATAATGCAGCAGCCGCAGTACATGTGCCAAATCATAATGGACAACCGTCT          | 300 |
| 34RADFp | AATCGGGATGATAATGCAGCAGCCGCAGTACATGTGCCAAATCATAATGGACAACCGTCT          | 244 |
| 34RADRp | -----TTATGGTAGCGGAGTAGTTGATGGA                                        | 25  |
| RAD14   | GCGCTTGCTAACACTAACACTAACACTACTTCACTTTATGGTAGCGGAGTAGTTGATGGA          | 360 |
| 34RADFp | GCGCTTGCTAACACTAACACTAACACTACTTCACTTTATGGTAGCGGAGTAGTTGATGGA<br>***** | 304 |
| 34RADRp | AGTAAAAGGGATGCGTCGGTACTCGACAAAAGGCCAACGGATAGAATCAGACCTAGCATA          | 85  |
| RAD14   | AGTAAAAGGGATGCGTCGGTACTCGACAAAAGGCCAACGGATAGAATCAGACCTAGCATA          | 420 |
| 34RADFp | AGTAAAAGGGATGCGTCGGTACTCGACAAAAGGCCAACGGATAGAATCAGACCTAGCATA<br>***** | 364 |
| 34RADRp | AGGAAACAAGATTACATTGAGTACGATTTTGCCACCATGCAGAACTTGAATGGTGGTTAT          | 145 |

|         |                                                                        |      |
|---------|------------------------------------------------------------------------|------|
| RAD14   | AGGAAACAAGATTACATTGAGTACGATTTTGCCACCATGCAGAACTTGAATGGTGGTTAT           | 480  |
| 34RADFp | AGGAAACAAGATTACATTGAGTACGATTTTGCCACCATGCAGAACTTGAATGGTGGTTAT<br>*****  | 424  |
| 34RADRp | ATCAACCCTAAGGACAAGCTTCCAAATTCTGACTTTACCGATGACCAAGAATTTGAATCT           | 205  |
| RAD14   | ATCAACCCTAAGGACAAGCTTCCAAATTCTGACTTTACCGATGACCAAGAATTTGAATCT           | 540  |
| 34RADFp | ATCAACCCTAAGGACAAGCTTCCAAATTCTGACTTTACCGATGACCAAGAATTTGAATCT<br>*****  | 484  |
| 34RADRp | GAGTTTGGATCTAAAAAGCAGAAGACACTACAGGACTGGAAAAAGGAACAACCTTGAACGG          | 265  |
| RAD14   | GAGTTTGGATCTAAAAAGCAGAAGACACTACAGGACTGGAAAAAGGAACAACCTTGAACGG          | 600  |
| 34RADFp | GAGTTTGGATCTAAAAAGCAGAAGACACTACAGGACTGGAAAAAGGAACAACCTTGAACGG<br>***** | 544  |
| 34RADRp | AAAATGCTGTACGAAAATGCACCTCCTCCAGAGCATATTTCAAAGGCGCCGAAATGTATT           | 325  |
| RAD14   | AAAATGCTGTACGAAAATGCACCTCCTCCAGAGCATATTTCAAAGGCGCCGAAATGTATT           | 660  |
| 34RADFp | AAAATGCTGTACGAAAATGCACCTCCTCCAGAGCATATTTCAAAGGCGCCGAAATGTATT<br>*****  | 604  |
| 34RADRp | GAATGTCATATTAATATTGAGATGGATCCTGTGCTACATGATGTGTTCAAGTTACAAGTT           | 385  |
| RAD14   | GAATGTCATATTAATATTGAGATGGATCCTGTGCTACATGATGTGTTCAAGTTACAAGTT           | 720  |
| 34RADFp | GAATGTCATATTAATATTGAGATGGATCCTGTGCTACATGATGTGTTCAAGTTACAAGTT<br>*****  | 664  |
| 34RADRp | TGTAAACAGTGTTCTAAGGAGCATCCAGAAAAGTATGCACTACTGACGAAAACAGAATGT           | 445  |
| RAD14   | TGTAAACAGTGTTCTAAGGAGCATCCAGAAAAGTATGCACTACTGACGAAAACAGAATGT           | 780  |
| 34RADFp | TGTAAACAGTGTTCTAAGGAGCATCCAGAAAAGTATGCACTACTGACGAAAACAGAATGT<br>*****  | 724  |
| 34RADRp | AAGGAAGATTACTTTTAAACAGACCCCGAATTGAATGATGAGGATCTCTTTCATAGACTA           | 505  |
| RAD14   | AAGGAAGATTACTTTTAAACAGACCCCGAATTGAATGATGAGGATCTCTTTCATAGACTA           | 840  |
| 34RADFp | AAGGAAGATTACTTTTAAACAGACCCCGAATTGAATGATGAGGATCTCTTTCATAGACTA<br>*****  | 784  |
| 34RADRp | GAAAA-GCCGAACCCTCATTCGGGGACATTTGCAAGAATGCAACTATTTGTTAGATGTGA           | 564  |
| RAD14   | GAAAA-GCCGAACCCTCATTCGGGGACATTTGCAAGAATGCAACTATTTGTTAGATGTGA           | 899  |
| 34RADFp | GAAAAAGCCGAACCCTCATTCGGGGACATTTGCAAGAATGCAACTATTTGTTAGATGTGA<br>*****  | 844  |
| 34RADRp | AGTGGAAGCCTTTTGC GTTCAAGAAATGGGGTGGGGAAGAAGGTTTAGATGAGGAATGGCA         | 624  |
| RAD14   | AGTGGAAGCCTTTTGC GTTCAAGAAATGGGGTGGGGAAGAAGGTTTAGATGAGGAATGGCA         | 959  |
| 34RADFp | AGTG-----<br>***                                                       | 848  |
| 34RADRp | ACGTCGTGAAGAAGGAAAGGCTCACAGAAGGGAGAAAAAATACGAAAAGAAAATCAAGGA           | 684  |
| RAD14   | ACGTCGTGAAGAAGGAAAGGCTCACAGAAGGGAGAAAAAATACGAAAAGAAAATCAAGGA           | 1019 |
| 34RADFp | -----                                                                  | 848  |
| 34RADRp | AATGCGACTGAAAACAAGAGCTCAAGAATATACTAATAGATTAAGGAAAAGAAGCATGG            | 744  |
| RAD14   | AATGCGACTGAAAACAAGAGCTCAAGAATATACTAATAGATTAAGGAAAAGAAGCATGG            | 1079 |
| 34RADFp | -----                                                                  | 848  |
| 34RADRp | GAAAGCCCATATTCATCATTTTTAGTGATCCAGTTGATGGAGGTATTGATGAAGACGGTTA          | 804  |
| RAD14   | GAAAGCCCATATTCATCATTTTTAGTGATCCAGTTGATGGAGGTATTGATGAAGACGGTTA          | 1139 |
| 34RADFp | -----                                                                  | 848  |
| 34RADRp | TCAAATCAAGAGAA-----                                                    | 820  |
| RAD14   | TCAAATCAAGAGAAAGATGTACAGACTGCGGGCTAGAACTGAAGAAATTGACATTTA              | 1199 |
| 34RADFp | -----                                                                  | 848  |
| 34RADRp | - 820                                                                  |      |
| RAD14   | A 1200                                                                 |      |
| 34RADFp | - 848                                                                  |      |

## SOD1

|          |                                                               |     |
|----------|---------------------------------------------------------------|-----|
| 34SOD1Fp | -----ACTGGAGCCGGGTGACTCTGGTGTGTGGGT                           | 30  |
| SOD1     | --ATGGTTCAAGCAGTGCAGTGTAAAGGGTGATGCCGGTGTCTCTGGTGTGTCAAGT     | 58  |
| 34SOD1Rp | TTAAGGTTCAAGCAGTGCAGTGTAAAGGGTGATGCCGGTGTCTCTGGTGTGTCAAGT     | 60  |
|          | * * * * *                                                     |     |
| 34SOD1Fp | TCTAGAGGTAATCCAAAACAAAGCCAACCACTGTCTCTTACAAAATCGCTGGTAACAGTC  | 90  |
| SOD1     | TCGAACAGGCTTCCGAATCCGAGCCAACCACTGTCTCTTACGAGATCGCTGGTAACAGTC  | 118 |
| 34SOD1Rp | TCGAACAGGCTTCCGAATCCGAGCCAACCACTGTCTCTTACGAGATCGCTGGTAACAGTC  | 120 |
|          | ** * * * *                                                    |     |
| 34SOD1Fp | CTAACGCAAAACGGGGTTCCACATTCATGATTTTGGAAATGCCACCAAGGGTTGTGTCT   | 150 |
| SOD1     | CTAACGCAGAACGTGGGGTTCCACATTCATGAGTTTGGAGATGCCACCAATGGTTGTGTCT | 178 |
| 34SOD1Rp | CTAACGCAGAACGTGGGGTTCCACATTCATGAGTTTGGAGATGCCACCAATGGTTGTGTCT | 180 |
|          | ***** * * * *                                                 |     |
| 34SOD1Fp | CTGCTGGTCTCACTTCAATCCTTTCAAAAAACACATGGGGCTCCAACCTGACAAATTCA   | 210 |
| SOD1     | CTGCTGGTCTCACTTCAATCCTTTCAAGAAGACACATGGTGTCTCCAACCTGACGAAGTCA | 238 |
| 34SOD1Rp | CTGCTGGTCTCACTTCAATCCTTTCAAGAAGACACATGGTGTCTCCAACCTGACGAAGTCA | 240 |
|          | ***** * * * *                                                 |     |
| 34SOD1Fp | AACATGTCGGTGACATGGGTAACGTAAAGACGGACAAAAATGGTGTGGCCAAGGGCTCCT  | 270 |
| SOD1     | GACATGTCGGTGACATGGGTAACGTAAAGACGGACGAAAAATGGTGTGGCCAAGGGCTCCT | 298 |
| 34SOD1Rp | GACATGTCGGTGACATGGGTAACGTAAAGACGGACGAAAAATGGTGTGGCCAAGGGCTCCT | 300 |
|          | ***** * * * *                                                 |     |
| 34SOD1Fp | TCAAGGACTCTTTGATCAAGCTTATCGGTCCTACCTCCGTTGTAGGCAAAACCGTCTTTA  | 330 |
| SOD1     | TCAAGGACTCTTTGATCAAGCTTATCGGTCCTACCTCCGTTGTAGGCAAGCGTCGTTA    | 358 |
| 34SOD1Rp | TCAAGGACTCTTTGATCAAGCTTATCGGTCCTACCTCCGTTGTAGGCAAGCGTCGTTA    | 360 |
|          | ***** * * * *                                                 |     |
| 34SOD1Fp | TCCACCCCGGCCAAAATGACTTAGGTAAGGGTGACACTGAAATCTTTGA--AACTGG     | 388 |
| SOD1     | TCCACGCCGGCCAAGATGACTTAGGTAAGGGTGACACTGAAATCTTTGA--AGACTGG    | 416 |
| 34SOD1Rp | TCCACGCCGGCCAAGATGACTTAGGTAATAGGTGATCACAGAGTAATCAGGAAGACTGG   | 420 |
|          | ***** * * * *                                                 |     |
| 34SOD1Fp | TAATGCCGGTCCAAACCAGCCTGTGGTGTCTATTGGTCTAAAACAATAAAA           | 440 |
| SOD1     | TAATGCCGGTCCAAACCAGCCTGTGGTGTCTATTGGTCTAACCAACTAA---          | 465 |
| 34SOD1Rp | TGATAACGTCCATGCACTC-----                                      | 4   |

## COX2

|         |                                                              |     |
|---------|--------------------------------------------------------------|-----|
| COX     | -----AAGTTAGATTTATTAAGATTACAATTAACAACATTCATTATGA             | 43  |
| 34COXFp | -----AAATTCCTTATGA                                           | 12  |
| 34COXRp | TTTTTTTTTTTTTTTAAAGTTAGATTTATTAAGATTACAATTAACAACATTCATTATGA  | 60  |
|         | . * : * . *****                                              |     |
| COX     | ATGATGTACCAACACCTTATGCATGTT-ATTTTCAGGATTCAGCAACACCAAATCAAGA- | 101 |
| 34COXFp | ATGATGTACCAACACCTTATGCATGTTATTTTCAGGATTCAGCAACACCAAATCAAGGA  | 72  |
| 34COXRp | ATGATGTACCAACACCTTATGCATGTT-ATTTTCAGGATTCAGCAACACCAAATCAAGA- | 118 |
|         | ***** * * * *                                                |     |
| COX     | AGGTATTTTAGAATTACATGATAATATTATGTTTTATTATTAGTTATTTTAGGTTTAG-  | 160 |
| 34COXFp | AGGTATTTTACAATTACATGATAATATTATGTTTTATTATTATTATTAGGTTTAGT     | 132 |
| 34COXRp | AGGTATTTTAGAATTACATGATAATATTATGTTTTATTATTAGTTATCTTAGGTTTAG-  | 177 |
|         | ***** * * * *                                                |     |
| COX     | TATCTTGAATGTTATATACAATTGTTATAACATATTCAAAAAATCCTATTGCATATAAAT | 220 |
| 34COXFp | GATCTTGAATGTTATATACAATTGTTATAACATATTCAAAAAATCCTATTGCATATAAAT | 192 |
| 34COXRp | TATCTTGAATGTTATATACAATTGTTATAACATATTCAAAAAATCCTATTGCATATAAAT | 237 |
|         | ***** * * * *                                                |     |
| COX     | ATATTAAACATGGACAAACTATTGAAGTTATTG---AACAAATTTTCCAGCTGTAATTT  | 277 |

|         |                                                               |     |
|---------|---------------------------------------------------------------|-----|
| 34COXFp | ATATTAACATGGACAAACTATTGAAAGTTATTGGCAACAATTTTTTCCAGCTGTAATAT   | 252 |
| 34COXRp | ATATTAACATGGACAAACTATTGAAGTTATTGGA-A-CAATTTTTCCAGCTGTAATTT    | 294 |
|         | *****. *: ** * .*:*****:*                                     |     |
| COX     | -TATTAATTATTGCTTTTCCTTCATTTATTTTATTATATTTATGTGATGAAGTTATTTCA  | 336 |
| 34COXFp | TTATTAATTATTGCTTTTCCTTCATTTATTTTATTATATTTATGTGATGAAGTTATTTCA  | 312 |
| 34COXRp | -TATTAATTATCGCTTTTCCTTCATTTATTCTATTATATTTATGTGATGAAGTTATTTCA  | 353 |
|         | ***** ***** ***** *****                                       |     |
| COX     | CCAGCTATAACTATTAAAGCTATTGGATATCAATGATATTGAAAATATGAATATTCAGAT  | 396 |
| 34COXFp | CCAGCTATAACTATTAAAGCTATTGCATATCATTGATATTGACAATATGAATATTCAGAT  | 372 |
| 34COXRp | CCAGCTATAACTATTAAAGCTATTGGATATCAATGATATTGAAAATATGAATATTCAGAT  | 413 |
|         | *****:*****.*****:***                                         |     |
| COX     | TTTATTAATGATAGTGGTGAAACTGTTGAATTTGAATCATATGTTATTCCTGATGAATTA  | 456 |
| 34COXFp | TTTATTATTGATAGTGGTGAAACTGATGAATTTGAATCATATGTTATTCCTGATGAATTA  | 432 |
| 34COXRp | TTTATTAATGATAGTGGTGAAACTGTTGAATTTGAATCATATGTTATTCCTGATGAATTA  | 473 |
|         | *****:*****:***** *****                                       |     |
| COX     | TTAGAAGAAGGTCAATTAAGATTATTAGATACTGATACTTCTATAGTTGTACCTGTAGAT  | 516 |
| 34COXFp | TTGGAAGAGCGTCAATTAAGATTATTACATCCGGATACTTCGATCATTGTACCTGAATAT  | 492 |
| 34COXRp | TTAGAAGAAGGTCAATTAAGATTATTAGATACTGATACTTCTATAGTTGTACCTGTAGAT  | 533 |
|         | *,*****. ***** *. * ***** *. *.*****: * **                    |     |
| COX     | ACACATATT-AGATTCGTTGTAACAGCTGCTGATGTTATTCATGATTTTGCTATTCCAAG  | 575 |
| 34COXFp | ACTCTCCTTGATTACATTGTTACAGCTGCTGAGATTATTTGAGAATTTGCTATCCCTTG   | 552 |
| 34COXRp | ACACATATC-AGATTCGTTGTAACAGCTGCTGATGTTATTCATGATTTTGCTATTCCAAG  | 592 |
|         | *,*: . * :.:*:*.*****:*****. ***** .: **:***** *: : *         |     |
| COX     | TTTAGGTATTAAAGTTGATGCTACTCCTGGTAGATTAAATCAAGTTTCTGCTTTAATTCA  | 635 |
| 34COXFp | TTTATGTATTTTCAGTAGACGCTACTCCAGATAAAATTAATCTAATTCCTACTATAATTCT | 612 |
| 34COXRp | TTTAGGTATTAAAGTTGATGCTACTCCTGGTAGATTAAATCAAGTTTCTGCTTTAATTCA  | 652 |
|         | *** *****: **. * *****: *. ** *****: *. ** *. *:*****:        |     |
| COX     | AAGAGAAGGTGTCCTTCTA--TGGAGCATGTTCTGAGTTGTGTGGGAC-AGGTCATGCAAA | 692 |
| 34COXFp | GTGATTCTGAGACACTCTTCTTGAATTTGTTGTTGCTTAAGCCGGACAAGAATATGCATA  | 672 |
| 34COXRp | AAGAGAAGGTGTCCTTCTAT--GGAGCATGTTCTGAGTTGTGTGGGAC-AGGTCATGCAAA | 709 |
|         | .: * : . *: *: : : * . : * * . * : * * * .:*****: *           |     |
| COX     | TATGCCAATT-AAGATCGAA-CAGTATCA-TACCTAAATTTTTG-AATGATAAAT-      | 747 |
| 34COXFp | TAGGTGTTGTTA-CATCAATCACAATAACATGTACGTTAAATTGTAGTCTTGATAAAATC  | 731 |
| 34COXRp | TATGCCCAATTAAGATCGAA-----GCCAGTTCATCAT-----                   | 744 |
|         | ** * : * * **.*: * . *: * :.:*.*                              |     |
| COX     | -AACCCTTAA-----                                               | 756 |
| 34COXFp | TACCCTTAAAAAAAAAAAAA                                          | 754 |
| 34COXRp | -----                                                         | 744 |
