# Supplementary material for: Saccharomyces cerevisiae DJ-1 paralogs maintain genome integrity through glycation repair of nucleic acids and proteins
Source: eLife journal article supplement (doi:10.7554/elife.88875), 2023-08-07
Supplement: supp [file elife-88875-supp-v1.zip]

## Mutation profile of SOD1, RAD14, and COX2

 Mutations  Original sequence Fp-Forward primer; Rp-reverse primer

### WT

#### SOD1

|      |                                                                |     |
|------|----------------------------------------------------------------|-----|
| WTFp | -----TTTAAAAGGGGGGGCCGGGGTTCTCTGGTGTGTGCA                      | 37  |
| SOD1 | -----ATGGTTCAAGCAGTCGCAGTGTTAAAGGGTGATGCCGGTGTCTCTGGTGTGTGCA   | 55  |
| WTRp | TTTATATGGTTCAAGCAGTCGCAGTGTTAAAGGGTGATGCCGGTGTCTCTGGTGTGTGCA   | 60  |
|      | * ** *** *                                                     |     |
| WTFp | AGTTTCGACAGGCTTCCGAATCCGAGCCAACCACTGTTCTCTTACAAAATCGCTGGTAAC   | 97  |
| SOD1 | AGTTTCGACAGGCTTCCGAATCCGAGCCAACCACT-GTCTCTTACGAGATCGCTGGTAAC   | 114 |
| WTRp | AGTTTCGACAGGCTTCCGAATCCGAGCCAACCACT-GTCTCTTACGAGATCGCTGGTAAC   | 119 |
|      | *****                                                          |     |
| WTFp | AGTCCTAACGCAAAACGTGGGTTCCACATTCATGAGTTTGAAATGCCACCAAGGGTTGT    | 157 |
| SOD1 | AGTCCTAACGCAAGACGTGGGTTCCACATTCATGAGTTTGAGATGCCACCAATGGTTGT    | 174 |
| WTRp | AGTCCTAACGCAAGACGTGGGTTCCACATTCATGAGTTTGAGATGCCACCAATGGTTGT    | 179 |
|      | *****                                                          |     |
| WTFp | GTCTCTGCTGGTCCTCACTTCAATCCTTTCAAAAAACACATGGTGCTCCAACGACAAA     | 217 |
| SOD1 | GTCTCTGCTGGTCCTCACTTCAATCCTTTCAAGAAGACACATGGTGCTCCAACGACGAA    | 234 |
| WTRp | GTCTCTGCTGGTCCTCACTTCAATCCTTTCAAGAAGACACATGGTGCTCCAACGACGAA    | 239 |
|      | ***** **                                                       |     |
| WTFp | TTCAAACATGTCGGTGACATGGGTAACGTAAAAACGGACAAAATGGTGTGGCCAAGGGC    | 277 |
| SOD1 | GTCAGACATGTCGGTGACATGGGTAACGTAAAGACGGACGAAAATGGTGTGGCCAAGGGC   | 294 |
| WTRp | GTCAGACATGTCGGTGACATGGGTAACGTAAAGACGGACGAAAATGGTGTGGCCAAGGGC   | 299 |
|      | *** *****                                                      |     |
| WTFp | TCCTTCAAGGACTCTTTGATCAAGCTTATCGGTCTACCTCCGTTGTAGGCAAAAGCGTC    | 337 |
| SOD1 | TCCTTCAAGGACTCTTTGATCAAGCTTATCGGTCTACCTCCGTTGTAGGCAGAAGCGTC    | 354 |
| WTRp | TCCTTCAAGGACTCTTTGATCAAGCTTATCGGTCTACCTCCGTTGTAGGCAGAAGCGTC    | 359 |
|      | *****                                                          |     |
| WTFp | TTTATCCACGCCGGCCAAAATGACTTAGGTAAGGGTGACACTGAAAAATCTTTGAAGACT   | 397 |
| SOD1 | GTTATCCACGCCGGCCAAAGATGACTTAGGTAAGGGTGACACTGAAGAATCTTTGAAGACT  | 414 |
| WTRp | GTTATCCACGCCGGCCAAAGATGACTTAGGTAAGGGTGACACTGAAGAATCTTTGAAGACTG | 419 |
|      | ***** *                                                        |     |
| WTFp | GGTAATGCCGGTCCAAACCAGCCTGTGGTGTGCTAATGGTCTAACACAATAAAAAA       | 453 |
| SOD1 | GGTAATGCCGGTCCAAACCAGCCTGTGGTGTGCTAATGGTCTAACCAACTAA-----      | 465 |
| WTRp | GTAATGCCCGTTCCCAAGGCCCGCCCCCAA-----                            | 450 |
|      | * * *** ** *                                                   |     |

#### RAD14

|      |                                                              |     |
|------|--------------------------------------------------------------|-----|
| WTRp | -----                                                        | 0   |
| WTFp | -----                                                        | 0   |
| RAD  | ATGACTCCCGAACAAAAGGCCAACTAGTATGTGTGAAAATGATTCTGTGTTTGTATTTT  | 60  |
| WTRp | -----                                                        | 0   |
| WTFp | -----                                                        | 0   |
| RAD  | AACCGTGGGTTTCTTTTACTAACAATTAAACGATGAGATGAGCTGTGCAGGAGGCTAAC  | 120 |
| WTRp | -----                                                        | 0   |
| WTFp | -----                                                        | 0   |
| RAD  | AGGAAATTAGCAATAGAACGGTTAAGAAAAAGGGGAATACTGAGTAGCGACCAATTGAAT | 180 |

|      |                                                               |     |
|------|---------------------------------------------------------------|-----|
| WTRp | -----                                                         | 0   |
| WTFp | -----                                                         | 0   |
| RAD  | CGAATAGAAAGTAGGAATGAACCTTTAAAAACCCGGCCTCTCGCAGTTACTAGTGGCAGC  | 240 |
| WTRp | -----                                                         | 0   |
| WTFp | -----                                                         | 0   |
| RAD  | AATCGGGATGATAATGCAGCAGCCGAGTACATGTGCCAAATCATAATGGACAACCGTCT   | 300 |
| WTRp | -----                                                         | 0   |
| WTFp | -----                                                         | 0   |
| RAD  | GCGCTTGCTAACACTAACACTAACTACTTCACTTTATGGTAGCGGAGTAGTTGATGGA    | 360 |
| WTRp | -----TATGACTTTTCGATGTACAAGGTCATCGGATAGAATCAGGCAGTGCCTA        | 49  |
| WTFp | -----A                                                        | 1   |
| RAD  | AGTAAAAGGGATATGCGGTACTCGACAAAAGGCCAACGGATAGAATCAGACCTAGCATA   | 420 |
|      | *                                                             |     |
| WTRp | CATAATCAAGATTACATTGAGTACGATTTTCATCACACCTGCATCAGAATGGTCGTTAT   | 109 |
| WTFp | ATGAAACAAGATTACATTGAGTACGATTTTGCCACCATGCAGAACTTGAATGGTGGTTAT  | 61  |
| RAD  | ATGAAACAAGATTACATTGAGTACGATTTTGCCACCATGCAGAACTTGAATGGTGGTTAT  | 480 |
|      | ** ***** *                                                    |     |
| WTRp | ATCGACGAATAGGACAAGCTTCCAAATCTTTCTTTTAAATATGACCGTGTATTTGAATG   | 169 |
| WTFp | ATCAACCCTAAGGACAAGCTTCCAAATCTG-ACTTTACCGATGACCAAGAATTTGAATC   | 120 |
| RAD  | ATCAACCCTAAGGACAAGCTTCCAAATCTG-ACTTTACCGATGACCAAGAATTTGAATC   | 539 |
|      | *** ** ***** *                                                |     |
| WTRp | TGAGTGTGGATAGTAGCAGCAGAAGACACTACAGGACTGGAAAAAGGACCAACTTGAACG  | 229 |
| WTFp | TGAGTTTGGATCTAAAAAGCAGAAGACACTACAGGACTGGAAAAAGGAACAACCTTGAACG | 180 |
| RAD  | TGAGTTTGGATCTAAAAAGCAGAAGACACTACAGGACTGGAAAAAGGAACAACCTTGAACG | 599 |
|      | ***** *                                                       |     |
| WTRp | GAAAATTTTGTGTCAGAAAATGCACCTTCTTCATAGCATCTTCAAATGCGCCGCAATTTAT | 289 |
| WTFp | GAAAATGCTGTACGAAAATGCACCTCCTCCAGAGCATATTTCAAAGGCGCCGAAATGTAT  | 240 |
| RAD  | GAAAATGCTGTACGAAAATGCACCTCCTCCAGAGCATATTTCAAAGGCGCCGAAATGTAT  | 659 |
|      | ***** ** ***** ** *                                           |     |
| WTRp | GGAAGCTAAGGTTTATATTGAGATGGATCCAAATATACGCGATGTGTTCAAGTTCCAAGA  | 349 |
| WTFp | TGAATGTCATATTAATATTGAGATGGATCCTGTGCTACATGATGTGTTCAAGTTACAAGT  | 300 |
| RAD  | TGAATGTCATATTAATATTGAGATGGATCCTGTGCTACATGATGTGTTCAAGTTACAAGT  | 719 |
|      | *** * ** ***** *                                              |     |
| WTRp | TTGTAAACTGGGTTTTAAGGAGCATCCAAAAAATATTCAATCATTGAAGAAAACATAAGG  | 409 |
| WTFp | TTGTAAACAGTGTTCTAAGGAGCATCCAGAAAAGTATGCACTACTGACGAAAACAGAATG  | 360 |
| RAD  | TTGTAAACAGTGTTCTAAGGAGCATCCAGAAAAGTATGCACTACTGACGAAAACAGAATG  | 779 |
|      | ***** * ** ***** * ** *                                       |     |
| WTRp | TAAAGAAGAATATTCTTTACCAGACCCCTGAAGTCAATGATGCGGATTTTTTTCATAGATC | 469 |
| WTFp | TAAGGAAGATTACTTTTAAACAGACCCCGAATTGAATGATGAGGATCTCTTTCATAGACT  | 420 |
| RAD  | TAAGGAAGATTACTTTTAAACAGACCCCGAATTGAATGATGAGGATCTCTTTCATAGACT  | 839 |
|      | *** ***** ** *                                                |     |
| WTRp | AGAAAAGCCGAACCTTCATTGCGGGACATTTGCAAGAATGCAAGCACAGG--AAGATCGA  | 527 |
| WTFp | AGAAAAGCCGAACCTTCATTGCGGGACATTTGCAAGAATGCAACTATTTGTTAGATGTGA  | 480 |
| RAD  | AGAAAAGCCGAACCTTCATTGCGGGACATTTGCAAGAATGCAACTATTTGTTAGATGTGA  | 899 |
|      | ***** ***** *                                                 |     |
| WTRp | AGTGGAAGCCTTTGCGTTCAAGAAATGGGGTGGAGAAGAAGGTTTGTATGAGGAAGGGCA  | 587 |
| WTFp | AGTGGAAGCCTTTGCGTTCAAGAAATGGGGTGGAGAAGAAGGTTTAGATGAGGAATGGCA  | 540 |
| RAD  | AGTGGAAGCCTTTGCGTTCAAGAAATGGGGTGGGAAGAAGGTTTAGATGAGGAATGGCA   | 959 |
|      | ***** ***** *                                                 |     |
| WTRp | ACGTCGTGAAGAAGGAAAGGCTCACAGAAGGGAGAAAAATACGAAAAGAAAATCAAGGA   | 647 |
| WTFp | ACGTCGTGAAGAAGGAAAGGCTCACAGAAGGGAGAAAAATACGAAAAGAAAATCAAGGA   | 600 |

|      |                                                                        |      |
|------|------------------------------------------------------------------------|------|
| RAD  | ACGTCGTGAAGAAGGAAAGGCTCACAGAAGGGAGAAAAAATACGAAAAGAAAATCAAGGA<br>*****  | 1019 |
| WTRp | AATGCGATTGAAAACAAGAGCTCAAGAATATATTAATAGATTAAGAGAAAAGAAGCATGG           | 707  |
| WTFp | AATGCGACTGAAAACAAGAGCTCAAGAATATACTAATAGATTAAGAGAAAAGAAGCATGG           | 660  |
| RAD  | AATGCGACTGAAAACAAGAGCTCAAGAATATACTAATAGATTAAGGGAAAAGAAGCATGG<br>*****  | 1079 |
| WTRp | GAAAGCCCATATTCATCATTTTAGTGATCCAGTTGATGGAGGTATTGATGAAGACGGTTA           | 767  |
| WTFp | GAAAGCCCATATTCATCATTTTAGTGATCCAGTTGATGGAGGTATTGATGAAGACGGTTA           | 720  |
| RAD  | GAAAGCCCATATTCATCATTTTAGTGATCCAGTTGATGGAGGTATTGATGAAGACGGTTA<br>*****  | 1139 |
| WTRp | TCAAATTCAAAGTATG-----                                                  | 783  |
| WTFp | TCAAATTCAAAGAAGAAGATGTACAGACTGCGGGCTAGAACTGAAGAAATTGACATTTA            | 780  |
| RAD  | TCAAATTCAAAGAAGAAGATGTACAGACTGCGGGCTAGAACTGAAGAAATTGACATTTA<br>***** * | 1199 |
| WTRp | -----                                                                  | 783  |
| WTFp | AAATGTC                                                                | 787  |
| RAD  | A-----                                                                 | 1200 |

## COX2

|         |                                                                            |     |
|---------|----------------------------------------------------------------------------|-----|
| WTCoxFp | -----T                                                                     | 1   |
| Cox2    | -----ATGTTAGATTTATTAAGATTACAATTAACAACATTCATTATGAATGATGTA                   | 51  |
| WTCoxRp | TTTTTTTTTATGTTAGATTTATTAAGATTACAATTAACAACATTCATTATGAATGATGTA               | 60  |
| WTCoxFp | CAACACCTTATGCATGTTTATTTTCAGGATTGAGCAACACCAAATCAAGAAGGTATTTTA               | 61  |
| Cox2    | CCAACACCTTATGCATGTTTATTTTCAGGATTGAGCAACACCAAATCAAGAAGGTATTTTA              | 111 |
| WTCoxRp | CCAACACCTTATGCATGTTTATTTTCAGGATTGAGCAACACCAAATCAAGAAGGTATTTTA<br>* * * * * | 120 |
| WTCoxFp | GAATTACATGATAATATTATGTTTTATTTATTAGTTATTTTAGGTTTAGTATCTTGAATG               | 121 |
| Cox2    | GAATTACATGATAATATTATGTTTTATTTATTAGTTATTTTAGGTTTAGTATCTTGAATG               | 171 |
| WTCoxRp | GAATTACATGATAATATTATGTTTTATTTATTAGTTATTTTAGGTTTAGTATCTTGAATG<br>*****      | 180 |
| WTCoxFp | TTATATACAATTGTTATAACATATTCAAAAAATCCTATTGCATATAAATATATTAAACAT               | 181 |
| Cox2    | TTATATACAATTGTTATAACATATTCAAAAAATCCTATTGCATATAAATATATTAAACAT               | 231 |
| WTCoxRp | TTATATACAATTGTTATAACATATTCAAAAAATCCTATTGCATATAAATATATTAAACAT<br>*****      | 240 |
| WTCoxFp | GGACAAACTATTGAAGTTATTTGAACAATTTTTCAGCTGTAATTTTATTAATTATTGCT                | 241 |
| Cox2    | GGACAAACTATTGAAGTTATTTGAACAATTTTTCAGCTGTAATTTTATTAATTATTGCT                | 291 |
| WTCoxRp | GGACAAACTATTGAAGTTATTTGAACAATTTTTCAGCTGTAATTTTATTAATTATTGCT<br>*****       | 300 |
| WTCoxFp | TTTCCTTCATTTATTTTATTATATTTATGTGATGAAGTTATTTACCAGCTATAACTATT                | 301 |
| Cox2    | TTTCCTTCATTTATTTTATTATATTTATGTGATGAAGTTATTTACCAGCTATAACTATT                | 351 |
| WTCoxRp | TTTCCTTCATTTATTTTATTATATTTATGTGATGAAGTTATTTACCAGCTATAACTATT<br>*****       | 360 |
| WTCoxFp | AAAGCTATTGGATATCAATGATATTGAAAATATGAATATTCAGATTTTATTAATGATAGT               | 361 |
| Cox2    | AAAGCTATTGGATATCAATGATATTGAAAATATGAATATTCAGATTTTATTAATGATAGT               | 411 |
| WTCoxRp | AAAGCTATTGGATATCAATGATATTGAAAATATGAATATTCAGATTTTATTAATGATAGT<br>*****      | 420 |
| WTCoxFp | GGTGAAACTGTTGAATTTGAATCATATGTTATTCCCTGATGAATTATTAGAAGAAGGTCAA              | 421 |
| Cox2    | GGTGAAACTGTTGAATTTGAATCATATGTTATTCCCTGATGAATTATTAGAAGAAGGTCAA              | 471 |
| WTCoxRp | GGTGAAACTGTTGAATTTGAATCATATGTTATTCCCTGATGAATTATTAGAAGAAGGTCAA<br>*****     | 480 |
| WTCoxFp | TTAAGATTATTAGATACTGATACTTCTATAGTTGTACCTGTAGATACACATATTAGATTC               | 481 |
| Cox2    | TTAAGATTATTAGATACTGATACTTCTATAGTTGTACCTGTAGATACACATATTAGATTC               | 531 |
| WTCoxRp | TTAAGATTATTAGATACTGATACTTCTATAGTTGTACCTGTAGATACACATATTAGATTC<br>*****      | 540 |

|         |                                                                         |     |
|---------|-------------------------------------------------------------------------|-----|
| WTCoxFp | GTTGTAACAGCTGCTGATGTTATTCATGATTTTGCTATTCCAAGTTTAGGTATTAAAGTT            | 541 |
| Cox2    | GTTGTAACAGCTGCTGATGTTATTCATGATTTTGCTATTCCAAGTTTAGGTATTAAAGTT            | 591 |
| WTCoxRp | GTTGTAACAGCTGCTGATGTTATTCATGATTTTGCTATTCCAAGTTTAGGTATTAAAGTT<br>*****   | 600 |
| WTCoxFp | GATGCTACTCCTGGTAGATTAAATCAAGTTTCTGCTTTAATTCAAGAGAGAAGGTGTCTTC           | 601 |
| Cox2    | GATGCTACTCCTGGTAGATTAAATCAAGTTTCTGCTTTAATTCAAGAGAGAAGGTGTCTTC           | 651 |
| WTCoxRp | GATGCTACTCCTGGTAGATTAAATCAAGTTTCTGCTTTAATTCAAGAGAGAAGGTGTCTTC<br>*****  | 660 |
| WTCoxFp | TATGGAGCATGTTCTGAGTTGTGTGGGACAGGTCATGCAAATATGCCAATTAAGATCGAA            | 661 |
| Cox2    | TATGGAGCATGTTCTGAGTTGTGTGGGACAGGTCATGCAAATATGCCAATTAAGATCGAA            | 711 |
| WTCoxRp | TATGGAGCATGTTCTGAGTTGTGTGGGACAGGTCATGCAAATATGCCAATTAAGATCG<br>***** * * | 720 |
| WTCoxFp | GCAGTATCATTACCTAAATTTTTGAATGATTAAATGAACAAAAAAAAAAA                      | 712 |
| Cox2    | GCAGTATCATTACCTAAATTTTTGAATGATTAAATGAACAAATAA-----                      | 756 |
| WTCoxRp | A-----                                                                  | 721 |

## $\Delta Q$

### **RAD14**

|        |                                                                                           |     |
|--------|-------------------------------------------------------------------------------------------|-----|
| QRADRp | TTTTTTTTTTTAAACACCCCCCCCCCGCTTTTAAAGAATGCGCCGGAATTAAAGGCC                                 | 60  |
| QRADFp | -----                                                                                     | 0   |
| RAD14  | -----ATGACTCC-CGAAC-AAAAGGCC                                                              | 21  |
| QRADRp | AAAATTTTTTTAGGTTTGTGAAAAGGATTTTTGGTTTTTTTTTTTTTGAATTGGTTT                                 | 120 |
| QRADFp | -----TAATTCTGT---GTTTGTATTTTAACCGTGGGT                                                    | 31  |
| RAD14  | AAAC-----TAGTATGTGTGAAAATGATTCGT---GTTTGTATTTTAACCGTGGGT<br>*** * *** * *                 | 71  |
| QRADRp | TTTTTTTTTCAACAATTACCTCCATGAAAGTGGGTTCGGTCAAAATGGGTGAACATGGGA                              | 180 |
| QRADFp | TCTTTTACTAACAAT-TTAACGATGAGGATGAGCTGTGCAGG---AGG-CTAACAGGA                                | 85  |
| RAD14  | TCTTTTACTAACAAT-TTAACGATG-AGATGAGCTGTGCAGG---AGG-CTAACAGGA<br>* * * * * * * * * * * * *   | 124 |
| QRADRp | CTTTTCCCATGGTTTCTGTTTATGTAAAAAGGAGTAGTACTGTTGTTGGGGCTCCAGTTG                              | 240 |
| QRADFp | AATTAG-CAATAGAACGGTTAAGAAAAAGGGGA---ATACT---GAGTAGCGACCAA---                              | 135 |
| RAD14  | AATTAG-CAATAGAACGGTTAAGAAAAAGGGGA---ATACT---GAGTAGCGACCAA---<br>* * * * * * * * * * * * * | 174 |
| QRADRp | ATCAGTAGCAGTTACCTTGAATTTAACCTTCGAAAAACCTCGTCCTTCGGCAGATCCC                                | 300 |
| QRADFp | TTGAATCGAATAGAAAGTAGGAATGAACCTTTAAAAACCCGGC--CTCTCGCAGTTA---                              | 190 |
| RAD14  | TTGAATCGAATAGAAAGTAGGAATGAACCTTTAAAAACCCGGC--CTCTCGCAGTTA---<br>* * * * * * * * * * * * * | 229 |
| QRADRp | TTCCGTCATCAATGAGGGATGCCTATTCCTAGCTAGTCAGCAGTACTTTCCACAACCTC                               | 360 |
| QRADFp | -----CTAGTGGCAGCAATCGGGATGATAATGCAGCAGCCGAGTACATGTGCCAAAT-C                               | 244 |
| RAD14  | -----CTAGTGGCAGCAATCGGGATGATAATGCAGCAGCCGAGTACATGTGCCAAAT-C<br>* * * * * * * * * * * * *  | 283 |
| QRADRp | TTAATGGACGCAAAGTGTGTGCATGTACCTCTAACAATTACTTTTCATTCCTCGCAAATG                              | 420 |
| QRADFp | ATAATG-GACAACCGTCTGCGCTTGTAACTACTAACAATACTACTTCACT-----T                                  | 297 |
| RAD14  | ATAATG-GACAACCGTCTGCGCTTGTAACTACTAACAATACTACTTCACT-----T<br>***** * * * * * * * * * * * * | 336 |
| QRADRp | GTAGCGGAATTAGTTGTTTGAAGTAAATAGGGATGTGACCGATATTCGACAAAAGGACA                               | 480 |
| QRADFp | TATGGTAGCGGAGTAGTTGATGGAAGTAAAAGGGATGCGCCGGTACTCGACAAAAGGCCA                              | 357 |
| RAD14  | TATGGTAGCGGAGTAGTTGATGGAAGTAAAAGGGATGCGTCGGTACTCGACAAAAGGCCA<br>* * * * * * * * * * * * * | 396 |
| QRADRp | TCGATTGAATCAGACCTTGCTTATCGAAACAAGATGACATTGAGTGTGATGCAGCCACC                               | 540 |

|        |                                                               |      |
|--------|---------------------------------------------------------------|------|
| QRADrp | ACGGATAGAATCAGACCTAGCATAAGGAAACAAGATTACATTGAGTACGATTTTGCCACC  | 417  |
| RAD14  | ACGGATAGAATCAGACCTAGCATAAGGAAACAAGATTACATTGAGTACGATTTTGCCACC  | 456  |
|        | *****                                                         |      |
| QRADrp | ATGCAGAACTTGAATGGTGGTTATATCAACCTTAAGGACAAGCCTCCTAATTCTGCACTT  | 600  |
| QRADFp | TTGCAGAACTTGAATGGTGGTTATATCATCCCTAAGGACAAGCTTCCAGATTCTGACTTT  | 477  |
| RAD14  | ATGCAGAACTTGAATGGTGGTTATATCAACCTTAAGGACAAGCTTCCAAATTCTGACTTT  | 516  |
|        | *****                                                         |      |
| QRADrp | ACTGTTGATCAAGAATAAGAATACGAGTTTGGCTCTTAAAAGCAGAAGACATCTACTGGA  | 660  |
| QRADFp | ACCGTTGACCAAGAATTTGAATCTGATTTTGGATCTAAAAAGCAGAAGAC-ACTACAGGA  | 536  |
| RAD14  | ACCGTTGACCAAGAATTTGAATCTGAGTTTGGATCTAAAAAGCAGAAGAC-ACTACAGGA  | 575  |
|        | ***                                                           |      |
| QRADrp | GTGGAAAAAGGAAC TACTTGAACGGAAAATGCTGTACGAAAACGCACCTCCTCCCGAGCA | 720  |
| QRADFp | CTGGAGAAGGAACAAC TTAACGGAAAATGCTGTACGAAAATGCACCTCCTCCAGAGCA   | 596  |
| RAD14  | CTGGAAAAAGGAACAAC TTAACGGAAAATGCTGTACGAAAATGCACCTCCTCCAGAGCA  | 635  |
|        | *****                                                         |      |
| QRADrp | TATTTCAAAGGCGCCGAAATGTATAGAATGTCATATTATTATTGTGATGGGTCATGTGAT  | 780  |
| QRADFp | TATTTCAAAGGCGCCGAAATGTATTGAATGTCATATTAATATTGAGATGGATCCTGTGCT  | 656  |
| RAD14  | TATTTCAAAGGCGCCGAAATGTATTGAATGTCATATTAATATTGAGATGGATCCTGTGCT  | 695  |
|        | *****                                                         |      |
| QRADrp | ACTTGATGTGTTCAACTTACAAGTTTGTAAACAGTGTCTAAGGAGCATCCAGAAAAGTA   | 840  |
| QRADfP | ACATGATGTGTTCAAGTTACAAGTTTGTAAACAGTGTCTAATGAGCATCCAGAAAAGTA   | 716  |
| RAD14  | ACATGATGTGTTCAAGTTACAAGTTTGTAAACAGTGTCTAAGGAGCATCCAGAAAAGTA   | 755  |
|        | *****                                                         |      |
| QRADrp | TGCACTACTGACGAAAACAGAATGTAAGGAAGATTACTTTTAAACAGACCCCGAATTGAA  | 900  |
| QRADFp | TGCACTACTGACGAATACAGAATGTAAGGAAGATTACTTTTAAACAGACCCCGAATTGAA  | 776  |
| RAD14  | TGCACTACTGACGAAAACAGAATGTAAGGAAGATTACTTTTAAACAGACCCCGAATTGAA  | 815  |
|        | *****                                                         |      |
| QRADrp | TGATGAGGATCTCTTTCATAGACTAGAAAAGCCGAACCCCTCATTCGGGGACATTTGCAAG | 960  |
| QRADFp | TGATGATGATCTCTTTCATAGACTAGAAAAGCCGAACCCCTCATTCGGGGACATTTGCAAG | 836  |
| RAD14  | TGATGAGGATCTCTTTCATAGACTAGAAAAGCCGAACCCCTCATTCGGGGACATTTGCAAG | 875  |
|        | *****                                                         |      |
| QRADrp | AATGCAACTATTTGTTAGATGTGAAGCGGAAGCCTTTGCGTTCAAGAAATGGGGTGGAGA  | 1020 |
| QRADfP | AATGCAACTATTTGTTAGATGTGAAGTGAAGCCTTTGCGTTCAAGAAATGGGGTGGAGA   | 896  |
| RAD14  | AATGCAACTATTTGTTAGATGTGAAGTGAAGCCTTTGCGTTCAAGAAATGGGGTGGAGA   | 935  |
|        | *****                                                         |      |
| QRADrp | AGAAGGTTTAGATGAGGAATGGCAACGTCGTGAAGAAGGAAAGGCTCACAGAAGGGAGAA  | 1080 |
| QRADFp | AGAAGGTTTAGATGAGGAATGGCAACGTCGTGAAGAAGGAAAGGCTCACAGAAGGGAGAA  | 956  |
| RAD14  | AGAAGGTTTAGATGAGGAATGGCAACGTCGTGAAGAAGGAAAGGCTCACAGAAGGGAGAA  | 995  |
|        | *****                                                         |      |
| QRADrp | AAAATACGAAAAGAAAATCAAGGAAATGCGACTGAAAACAAGAGCTCAAGAATATAC TAA | 1140 |
| QRADFp | AAAATACGAAAAGAAAATCAAGGAAATGCGACTGAAAACAAGAGCTCAGGAATATCCTAA  | 1016 |
| RAD14  | AAAATACGAAAAGAAAATCAAGGAAATGCGACTGAAAACAAGAGCTCAAGAATATAC TAA | 1055 |
|        | *****                                                         |      |
| QRADrp | TAGATTAA-GAGAAAAGAAGCATGGGAAAGCCCATATTCATCATTTTAGTGATCCAGTTG  | 1199 |
| QRADFp | TAGATTAAAGAAAAAGAAGCATGGGAAAGCCCATATTCACCATTTTAGTGATCCAGTTG   | 1076 |
| RAD14  | TAGATTAA-GAGAAAAGAAGCATGGGAAAGCCCATATTCATCATTTTAGTGATCCAGTTG  | 1114 |
|        | *****                                                         |      |
| QRADrp | ATGGAGGTATTGATGAAGCACGGTTATCAAATTCAAAGAGATTGAG-----           | 1250 |
| QRADFp | ATGGAGGTATTGATGAAGACGGTTATCAAATTCAAAGAAA-AATGACAGAACTGCGGGC   | 1135 |
| RAD14  | ATGGAGGTATTGATGAAGACGGTTATCAAATTCAAAGAGGAGATGTACAGACTGCGGGC   | 1174 |
|        | *****                                                         |      |
| QRADrp | -----                                                         | 1250 |
| QRADFp | TAGAACTGAAGATTGATTTAATTTAATTTT TTTTAAACGCGGTCAGTAGTTTT        | 1195 |
| RAD14  | TAGAACTGAAGAAATTGACATTAA-----                                 | 1200 |

QRADRp ----- 1250  
 QRADFp AAAAAAATATTAC 1208  
 RAD14 ----- 1200

## COX2

|      |                                                               |     |
|------|---------------------------------------------------------------|-----|
| COX  | -----ATGTTAGATTATTAAGATTACAATTAACAACATTCATTATG                | 42  |
| QCFp | -----                                                         | 0   |
| QCRp | TTTTTTTTTTTTTTTTTTAATTAGATTATTAAGATTACAATTAACAACATTCATTATG    | 60  |
| COX  | AATGATGTACCAACACCT-TATGCATGTTATTTTCAGGATTCAGCAACACCAAATCAAGA  | 101 |
| QCFp | ---AATGTACCAACACCTTTATGCATGTTATTTTCAGGATTCAGCAACACCAAATCAAGA  | 57  |
| QCRp | AATAATGTACCAACACCT-TATGCATGTTATTTTCAGGATTCAGCAACACCAAATCAAGA  | 119 |
|      | *****                                                         |     |
| COX  | AGGTATTTTAGAATTACATGATAATATTATGTTTTATTTATTAGTTATTTTAGGTTTAGT  | 161 |
| QCFp | AGGTATTTTAGAATTACATGATAATATTATGTTTTATTTATTAGTTATTTTAGGTTTAGT  | 117 |
| QCRp | AGGTATTTTAGAATTACATGATAATATTATGTTTTATTTATTAGTTATTTTAGGTTTAGT  | 179 |
|      | *****                                                         |     |
| COX  | ATCTTGAATGTTATATACAAATTGTTATAACATATTCAAAAAATCCTATTGCATATAAATA | 221 |
| QCFp | ATCTTGAATGTTATATACAAATTGTTATAACATATTCAAAAAATCCTATTGCATATAAATA | 177 |
| QCRp | ATCTTGAATGTTATATACAAATTGTTATAACATATTCAAAAAATCCTATTGCATATAAATA | 239 |
|      | *****                                                         |     |
| COX  | TATTAACATGGACAAACTATTGAAGTTATTTGAACAATTTTCCAGCTGTAATTTTATT    | 281 |
| QCFp | TATTAACATGGACAAACTATTGAAGTTATTTGAACAATTTTCCAGCTGTAATTTTATT    | 237 |
| QCRp | TATTAACATGGACAAACTATTGAAGTTATTTGAACAATTTTCCAGCTGTAATTTTATT    | 299 |
|      | *****                                                         |     |
| COX  | AATTATTGCTTTTCCTTCATTTATTTTATTATATTTATGTGATGAAGTTATTTACCAGC   | 341 |
| QCFp | AATTATTGCTTTTCCTTCATTTATTTTATTATATTTATGTGATGAAGTTATTTACCAGC   | 297 |
| QCRp | AATTATTGCTTTTCCTTCATTTATTTTATTATATTTATGTGATGAAGTTATTTACCAGC   | 359 |
|      | *****                                                         |     |
| COX  | TATAACTATTAAAGCTATTGGATATCAATGATATTGAAAATATGAATATTCAGATTTTAT  | 401 |
| QCFp | TATAACTATTAAAGCTATTGGATATCAATGATATTGAAAATATGAATATTCAGATTTTAT  | 357 |
| QCRp | TATAACTATTAAAGCTATTGGATATCAATGATATTGAAAATATGAATATTCAGATTTTAT  | 419 |
|      | *****                                                         |     |
| COX  | TAATGATAGTGGTGAACTGTTGAATTTGAATCATATGTTATTCCTGATGAATTATTAGA   | 461 |
| QCFp | TAATGATAGTGGTGAACTGTTGAATTTGAATCATATGTTATTCCTGATGAATTATTAGA   | 417 |
| QCRp | TAATGATAGTGGTGAACTGTTGAATTTGAATCATATGTTATTCCTGATGAATTATTAGA   | 479 |
|      | *****                                                         |     |
| COX  | AGAAGGTCAATTAAGATTATTAGATACTGATACTTCTATAGTTGTACCTGTAGATACACA  | 521 |
| QCFp | AGAAGGTCAATTAAGATTATTAGATACTGATACTTCTATAGTTGTACCTGTAGATACACA  | 477 |
| QCRp | AGAAGGTCAATTAAGATTATTAGATACTGATACTTCTATAGTTGTACCTGTAGATACACA  | 539 |
|      | *****                                                         |     |
| COX  | TATTAGATTCGTTGTAACAGCTGCTGATGTTATTCATGATTTTGCTATTCCAAGTTTAGG  | 581 |
| QCFp | TATTAGATTCGTTGTAACAGCTGCTGATGTTATTCATGATTTTGCTATTCCAAGTTTAGG  | 537 |
| QCRp | TATTAGATTCGTTGTAACAGCTGCTGATGTTATTCATGATTTTGCTATTCCAAGTTTAGG  | 599 |
|      | *****                                                         |     |
| COX  | TATTAAAGTTGATGCTACTCCTGGTAGATTAAATCAAGTTTCTGCTTTAATTCAAAGAGA  | 641 |
| QCFp | TATTAAAGTTGATGCTACTCCTGGTAGATTAAATCAAGTTTCTGCTTTAATTCAAAGAGA  | 597 |
| QCRp | TATTAAAGTTGATGCTACTCCTGGTAGATTAAATCAAGTTTCTGCTTTAATTCAAAGAGA  | 659 |
|      | *****                                                         |     |
| COX  | AGGTGCTTCTATGGAGCATGTTCTGAGTTGTGTGGGACAGGTCATGCAAATATGCCAAT   | 701 |

|      |                                                              |     |
|------|--------------------------------------------------------------|-----|
| QCFp | AGGTGTCTTCTATGGAGCATGTTCTGAGTTGTGTGGGACAGGTCATGCAAATATGCCAAT | 657 |
| QCRp | AGGTGTCTTCTATGGAGCATGTTCTGAGTTGTGTGGGACAGGTCATGCAAATATGCCAAT | 719 |
|      | *****                                                        |     |

|      |                                                            |     |
|------|------------------------------------------------------------|-----|
| COX  | TAAGATCGAAGCAGTATCATTACCTAAATTTTGGGAATGATTAAATGAACATAA---- | 756 |
| QCFp | TAAGATCGAAGCAGTATCATTACCTAAATTTTGGGAATGATTAAATGACACCAAAAAA | 717 |
| QCRp | TAAGATTGA-----                                             | 728 |
|      | ***** **                                                   |     |

|      |       |     |
|------|-------|-----|
| COX  | ----- | 756 |
| QCFp | AAAAA | 726 |
| QCRp | ----- | 728 |

## SOD1

|      |                                                            |    |
|------|------------------------------------------------------------|----|
| QFP  | -----GGCCAATCATGCAGTCAG-----CCTGTGAGTGTCAATG               | 38 |
| SOD1 | -----ATGGTTCAAGCAGTCGCAGTGTTAAAGGGTGATGCCGGTGTCTCTG        | 46 |
| QRP  | AAGTCGCGGATCCAATTCGAATCCGAGTCGCAGTGTTAAAGGGTGATGCCGGTGTTCG | 60 |
|      | *** ***** ** **** *                                        |    |

|      |                                                              |     |
|------|--------------------------------------------------------------|-----|
| QFP  | GTCTAACCAAC-GATTACAGGATGACG-----ACGATAAGTAAATCGACGCGTAC      | 87  |
| SOD1 | GTGTTGTCAAGTTCGAACAGGCTTCCGAATCCGAGCCAACCACTGTCTCTTACGAGATCG | 106 |
| QRP  | GTGTTGTCAAGTTCGAACAGGCTTCCGAATCCGAGCCAACCACTGTCTTTACGAGATCG  | 120 |
|      | ** * *** ***** * ** * *                                      |     |

|      |                                                              |     |
|------|--------------------------------------------------------------|-----|
| QFP  | GAGTCGCGGTGCATGATATGGAATCTCGTGTAATCACTGTCCAATATGGAGATGCGGCGT | 147 |
| SOD1 | CTGGTAACAGTCCTAACGCAGAACGTGGGTTCACATTCATGAGTTGGAGATGCCACCA   | 166 |
| QRP  | CTGGTAACAGTCCTAACGCAGAACGTGGGTTCACATTCATGAGTTGGAGATGCCACCA   | 180 |
|      | * * * * * *** * * * * * * * * * * *                          |     |

|      |                                                              |     |
|------|--------------------------------------------------------------|-----|
| QFP  | CTGGGTGTGTCCCTGCTGGTCCTCACTTCAATCCTTTCAAGAAGACACATGGTGCTCCAA | 207 |
| SOD1 | ATGGTTGTGTCTCTGCTGGTCCTCACTTCAATCCTTTCAAGAAGACACATGGTGCTCCAA | 226 |
| QRP  | ATGGTTGTGTCTCTGCTGGTCCTCACTTCAATCCTTTCAAGAAGACACATGGTGCTCCAA | 240 |
|      | *** ***** ***** ***** *****                                  |     |

|      |                                                              |     |
|------|--------------------------------------------------------------|-----|
| QFP  | CTGACGAAGTCAGACATGTCGGTGACATGGGTAACGTAAAGACGGACGAAAATGGTGTGG | 267 |
| SOD1 | CTGACGAAGTCAGACATGTCGGTGACATGGGTAACGTAAAGACGGACGAAAATGGTGTGG | 286 |
| QRP  | CTGACGAAGTCAGACATGTCGGTGACATGGGTAACGTAAAGACGGACGAAAATGGTGTGG | 300 |
|      | *****                                                        |     |

|      |                                                              |     |
|------|--------------------------------------------------------------|-----|
| QFP  | CCAAGGGCTCCTTCAAGGACTCTTTGATCAAGCTTATCGGTCCTACCTCCGTTGTAGCA  | 327 |
| SOD1 | CCAAGGGCTCCTTCAAGGACTCTTTGATCAAGCTTATCGGTCCTACCTCCGTTGTAGGCA | 346 |
| QRP  | CCAAGGGCTCCTTCAAGGACTCTTTGATCAAGCTTATCGGTCCTACCTCCGTTGTAGCA  | 360 |
|      | ***** ***** ** * * * * * * * * *                             |     |

|      |                                                           |     |
|------|-----------------------------------------------------------|-----|
| QFP  | GAAGCGTCGTTATCCACGCCGCCAAGATGACTTAGG-----TAAGGGTGACACTGAA | 380 |
| SOD1 | GAAGCGTCGTTATCCACGCCGCCAAGATGACTTAGG-----TAAGGGTGACACTGAA | 399 |
| QRP  | GA-----TTACAAGGATGACGACGATAAGTAAGTCGACGCGTACGCGTGATCCAGAA | 412 |
|      | ** * * * * * * * * * * * * * * *                          |     |

|      |                                                               |     |
|------|---------------------------------------------------------------|-----|
| QFP  | GAATCTTTGAAGACTGGTAATGCCGGTCCAAGACCAGCCTGTGGTGTTCATTGGTCTAACC | 440 |
| SOD1 | GAATCTTTGAAGACTGGTAATGCCGGTCCAAGACCAGCCTGTGGTGTTCATTGGTCTAACC | 459 |
| QRP  | TCA-TGCGGGTGCCGTGTAATGCCGGTCCAAGACCAGTCTGATAT-----            | 457 |
|      | * * * * * ***** *                                             |     |

|      |                                            |     |
|------|--------------------------------------------|-----|
| QFP  | AACATACGAGGATGACGACGATAACTAAGTCAACGCGAAAGA | 484 |
| SOD1 | AACATA-----                                | 465 |
| QRP  | -----                                      | 457 |

## HSP31

### COX2

|       |                                                                            |     |
|-------|----------------------------------------------------------------------------|-----|
| COX   | -----ATG-TT <b>A</b> GATTTATTAAGATTACAATTAACAACATTCATTA                    | 40  |
| 31CFp | -----                                                                      | 0   |
| 31CRp | TTTTTTTTTTTTTTTTTAAATGTTT <b>B</b> GATTTATTAAGATTACAATTAACAACATTCATTA      | 60  |
| COX   | TGAATGATGTACCAACACCT-TATGCATGTTATTTTCAGGATTTCAGCAACACCAAATCAA              | 99  |
| 31CFp | ----TAATGTACCAACACCTTTATGCATGTTATTTTCAGGATTTCAGCAACACCAAATCAA              | 56  |
| 31CRp | TGAATGATGTACCAACACCT-TATGCATGTTATTTTCAGGATTTCAGCAACACCAAATCAA<br>* . ***** | 119 |
| COX   | GAAGGTATTTTAGAATTACATGATAATATTATGTTTTATTTATTAGTTATTTTAGGTTTA               | 159 |
| 31CFp | GAAGGTATTTTAGAATTACATGATAATATTATGTTTTATTTATTAGTTATTTTAGGTTTA               | 116 |
| 31CRp | GAAGGTATTTTAGAATTACATGATAATATTATGTTTTATTTATTAGTTATTTTAGGTTTA<br>*****      | 179 |
| COX   | GTATCTTGAATGTTATATACAATTGTTATAACATATTCAAAAATCCTATTGCATATAAA                | 219 |
| 31CFp | GTATCTTGAATGTTATATACAATTGTTATAACATATTCAAAAATCCTATTGCATATAAA                | 176 |
| 31CRp | GTATCTTGAATGTTATATACAATTGTTATAACATATTCAAAAATCCTATTGCATATAAA<br>*****       | 239 |
| COX   | TATATTAAACATGGACAAACTATTGAAGTTATTTGAACAATTTTTCAGCTGTAATTTTA                | 279 |
| 31CFp | TATATTAAACATGGACAAACTATTGAAGTTATTTGAACAATTTTTCAGCTGTAATTTTA                | 236 |
| 31CRp | TATATTAAACATGGACAAACTATTGAAGTTATTTGAACAATTTTTCAGCTGTAATTTTA<br>*****       | 299 |
| COX   | TTAATTATTGCTTTTCCTTCATTTATTTTATTATATTTATGTGATGAAGTTATTTACCA                | 339 |
| 31CFp | TTAATTATTGCTTTTCCTTCATTTATTTTATTATATTTATGTGATGAAGTTATTTACCA                | 296 |
| 31CRp | TTAATTATTGCTTTTCCTTCATTTATTTTATTATATTTATGTGATGAAGTTATTTACCA<br>*****       | 359 |
| COX   | GCTATAACTATTAAAGCTATTGGATATCAATGATATTGAAAATATGAATATTCAGATTTT               | 399 |
| 31CFp | GCTATAACTATTAAAGCTATTGGATATCAATGATATTGAAAATATGAATATTCAGATTTT               | 356 |
| 31CRp | GCTATAACTATTAAAGCTATTGGATATCAATGATATTGAAAATATGAATATTCAGATTTT<br>*****      | 419 |
| COX   | ATTAATGATAGTGGTGAAACTGTTGAATTTGAATCATATGTTATTCCTGATGAATTATTA               | 459 |
| 31CFp | ATTAATGATAGTGGTGAAACTGTTGAATTTGAATCATATGTTATTCCTGATGAATTATTA               | 416 |
| 31CRp | ATTAATGATAGTGGTGAAACTGTTGAATTTGAATCATATGTTATTCCTGATGAATTATTA<br>*****      | 479 |
| COX   | GAAGAAGGTCAATTAAGATTATTAGATACTGATACTTCTATAGTTGTACCTGTAGATACA               | 519 |
| 31CFp | GAAGAAGGTCAATTAAGATTATTAGATACTGATACTTCTATAGTTGTACCTGTAGATACA               | 476 |
| 31CRp | GAAGAAGGTCAATTAAGATTATTAGATACTGATACTTCTATAGTTGTACCTGTAGATACA<br>*****      | 539 |
| COX   | CATATTAGATTCGTTGTAACAGCTGCTGATGTTATTCATGATTTTGCTATTCCAAGTTTA               | 579 |
| 31CFp | CATATTAGATTCGTTGTAACAGCTGCTGATGTTATTCATGATTTTGCTATTCCAAGTTTA               | 536 |
| 31CRp | CATATTAGATTCGTTGTAACAGCTGCTGATGTTATTCATGATTTTGCTATTCCAAGTTTA<br>*****      | 599 |
| COX   | GGTATTAAAGTTGATGCTACTCCTGGTAGATTAAATCAAGTTTCTGCTTTAATTCAAAGA               | 639 |
| 31CFp | GGTATTAAAGTTGATGCTACTCCTGGTAGATTAAATCAAGTTTCTGCTTTAATTCAAAGA               | 596 |
| 31CRp | GGTATTAAAGTTGATGCTACTCCTGGTAGATTAAATCAAGTTTCTGCTTTAATTCAAAGA<br>*****      | 659 |
| COX   | GAAGGTGCTTCTATGGAGCATGTTCTGAGTTGTGTGGGACAGGTCATGCAAAT-ATGC-                | 697 |
| 31CFp | GAAGGTGCTTCTATGGAGCATGTTCTGAGTTGTGTGGGACAGGTCATGCAAAT-ATGCC                | 655 |
| 31CRp | GAAGGTGCTTCTATGGAGCATGTTCTGAGTTGTGTGGGACAGGTCATGCAAATATGCC<br>*****:       | 719 |



|       |                                                  |     |
|-------|--------------------------------------------------|-----|
| COX   | CAATTAAGATCGAAGCAGTATCATTACCTAAATTTTTGGAATGATTAA | 756 |
| 31CFp | AA-TTAAGATCGAAGCAGTATCATTACCTAAATTTTTGGAATGATTAA | 714 |
| 31CRp | CAATTAAGATTA-----                                | 731 |
|       | . * * * * * .                                    |     |

|       |             |     |
|-------|-------------|-----|
| COX   | -----       | 756 |
| 31CFp | AAAAAATAAAA | 726 |
| 31CRp | -----       | 731 |

## **RAD14**

|      |                                                         |    |
|------|---------------------------------------------------------|----|
| 31Rp | GTTTAAATCCCGAACA                                        | 55 |
| 31Fp | -----ATTGTTTGTAT                                        | 11 |
| RAD  | --ATGATCCCGAACAAGGCCAAACTAGTATGTGTGAAATGATTCTGTGTTTGTAT | 57 |
|      | : * * * * *                                             |    |

|      |                                                             |     |
|------|-------------------------------------------------------------|-----|
| 31Rp | TTTAACCGTAG-GTTTCTTTTACTAACAATTTAACGATGAGATGAGCTGTGCAGGAGGC | 114 |
| 31Fp | TTTAACCGTGGGGTTTCTTTTACTAACAATTTAACGATGAGATGAGCTGTGCAGGAGGC | 71  |
| RAD  | TTTAACCGTGG-GTTTCTTTTACTAACAATTTAACGATGAGATGAGCTGTGCAGGAGGC | 116 |
|      | ***** . * *****                                             |     |

|      |                                                              |     |
|------|--------------------------------------------------------------|-----|
| 31Rp | TAACAGGAAATTAGCCATAGATCGGTTAAGAAAAAGGGGAATACTGAGTAGCGACCAATT | 174 |
| 31Fp | TAACAGGAAATTAGCAATAGAACGGTTAAGAAAAAGGGGAATACTGAGTAGCGACCAATT | 131 |
| RAD  | TAACAGGAAATTAGCAATAGAACGGTTAAGAAAAAGGGGAATACTGAGTAGCGACCAATT | 176 |
|      | ***** . ***** : *****                                        |     |

|      |                                                              |     |
|------|--------------------------------------------------------------|-----|
| 31Rp | GAATCGAATAGAAAGTAGGAATGAACCTTTAAAAACCCGGCCTCTCGCAGTTACTAGTGG | 234 |
| 31Fp | GAATCGAATAGAAAGTAGGAATGAACCTTTAAAAACCCGGCCTCTCGCAGTTACTAGTGG | 191 |
| RAD  | GAATCGAATAGAAAGTAGGAATGAACCTTTAAAAACCCGGCCTCTCGCAGTTACTAGTGG | 236 |
|      | *****                                                        |     |

|      |                                                             |     |
|------|-------------------------------------------------------------|-----|
| 31Rp | CAGCAATCGGGATGATAATGCAGCAGCCGAGTACATGTGCCAAATCATAATGGACAACC | 294 |
| 31Fp | CAGCAATCGGGATGATAATGCAGCAGCCGAGTACATGTGCCAAATCATAATGGACAACC | 251 |
| RAD  | CAGCAATCGGGATGATAATGCAGCAGCCGAGTACATGTGCCAAATCATAATGGACAACC | 296 |
|      | *****                                                       |     |

|      |                                                            |     |
|------|------------------------------------------------------------|-----|
| 31Rp | GTCTGCGCTTGCTAACACTAACACTAACTACTTCACTTTATGGTAGCGGAGTAGTTGA | 354 |
| 31Fp | GTCTGCGCTTGCTAACACTAACACTAACTACTTCACTTTATGGTAGCGGAGTAGTTGA | 311 |
| RAD  | GTCTGCGCTTGCTAACACTAACACTAACTACTTCACTTTATGGTAGCGGAGTAGTTGA | 356 |
|      | *****                                                      |     |

|      |                                                               |     |
|------|---------------------------------------------------------------|-----|
| 31Rp | TGGAAGTAAAAGGGATGTGTCTAGTACTCGACAAAAGGCCAACGGATAGAATCAGACCTAG | 414 |
| 31Fp | TGGAAGTAAAAGGGATGCGTCGGTACTCGACAAAAGGCCAACGGATAGAATCAGACCTAG  | 371 |
| RAD  | TGGAAGTAAAAGGGATGCGTCGGTACTCGACAAAAGGCCAACGGATAGAATCAGACCTAG  | 416 |
|      | ***** * * * . *****                                           |     |

|      |                                                              |     |
|------|--------------------------------------------------------------|-----|
| 31Rp | CATAAGGAAACAAGATTACATTGAGTACGATTTTGCCACCATGCAGAACTTGAATGGTGG | 474 |
| 31Fp | CATAAGGAAACAAGATTACATTGAGTACGATTTTGCCACCTTGCAGAACTTGAATGGTGG | 431 |
| RAD  | CATAAGGAAACAAGATTACATTGAGTACGATTTTGCCACCATGCAGAACTTGAATGGTGG | 476 |
|      | ***** . *****                                                |     |

|      |                                                              |     |
|------|--------------------------------------------------------------|-----|
| 31Rp | TTATATCAACCCTAAGGACAAGCTTCCAAATTCTGACTTTACCGATGACCAAGAATTTGA | 534 |
| 31Fp | TTATATCAACCCTAAGGACAAGCTTCCAAATTCTGACTTTACCGATGACCAAGAATTTGA | 491 |
| RAD  | TTATATCAACCCTAAGGACAAGCTTCCAAATTCTGACTTTACCGATGACCAAGAATTTGA | 536 |
|      | *****                                                        |     |

|      |                                                               |     |
|------|---------------------------------------------------------------|-----|
| 31Rp | ATCTGAGTTTGGATCTAAAAAGCAGAAGACACTACAGGACTGGAAAAAGGAACAACCTTGA | 594 |
| 31Fp | ATCTGAGTTTGGATCTAAAAAGCAGAAGACACTACAGGACTGGAAAAAGGAACAACCTTGA | 551 |
| RAD  | ATCTGAGTTTGGATCTAAAAAGCAGAAGACACTACAGGACTGGAAAAAGGAACAACCTTGA | 596 |
|      | *****                                                         |     |

|      |                                                                |     |
|------|----------------------------------------------------------------|-----|
| 31Rp | ACGGAAAAATGCTGTACGAAAAATGCACCTCCTCCAGAGCATATTTCAAAGGCGCCGAAATG | 654 |
| 31Fp | ACGGAAAAATGCTGTACGAAAAATGCACCTCCTCCAGAGCATATTTCAAAGGCGCCGAAATG | 611 |
| RAD  | ACGGAAAAATGCTGTACGAAAAATGCACCTCCTCCAGAGCATATTTCAAAGGCGCCGAAATG | 656 |
|      | *****                                                          |     |

|      |                                                                                 |      |
|------|---------------------------------------------------------------------------------|------|
| 31Rp | TATTGAATGTCATATTAATATTGAGATGGATCCTGTGCTACATGATGTGTTCAAGTTACA                    | 714  |
| 31Fp | TATTGAATGTCATATTAATATTGAGATGGATCCTGTGCTACATGATGTGTTCAAGTTACA                    | 671  |
| RAD  | TATTGAATGTCATATTAATATTGAGATGGATCCTGTGCTACATGATGTGTTCAAGTTACA<br>*****           | 716  |
| 31Rp | AGTTTGTAAACAGTGTTCTAAGGAGCATCCAGAAAAGTATGCACTACTGACGAAAACAGA                    | 774  |
| 31Fp | AGTTTGTAAACAGTGTTCTAAGGAGCATCCAGAAGAGTATGCACTACTGACGAATACAGA                    | 731  |
| RAD  | AGTTTGTAAACAGTGTTCTAAGGAGCATCCAGAAAAGTATGCACTACTGACGAAAACAGA<br>*****           | 776  |
| 31Rp | ATGTAAGGAAGATTACTTTTAAACAGACCCCGAATTGAATGATGAGGATCTCTTTCATAG                    | 834  |
| 31Fp | ATGTAAGGAAGATTACTTTTAAACAGACCCCGAATTGAATGATGAGGATCTCTTTCATAG                    | 791  |
| RAD  | ATGTAAGGAAGATTACTTTTAAACAGACCCCGAATTGAATGATGAGGATCTCTTTCATAG<br>*****           | 836  |
| 31Rp | ACTAGAAAAGCCGAACCCTCATTCGGGGACATTTGCAAGAATGCAACTATTTGTTAGATG                    | 894  |
| 31Fp | ACTAGAAAAGCCGAACCCTCATTCGGGGACATTTGCAAGAATGCAACTATTTGTTAGATG                    | 851  |
| RAD  | ACTAGAAAAGCCGAACCCTCATTCGGGGACATTTGCAAGAATGCAACTATTTGTTAGATG<br>*****           | 896  |
| 31Rp | TGAAGTGAAGCCTTTGCGTTCAAGAAATGGGGTGGAGAAGAAGGTTTAGATGAGGAATG                     | 954  |
| 31Fp | TGAAGTGAAGCCTTTGCGTTCAAGAAATGGGGTGGAGAAGAAGGTTTAGATGAGGAATG                     | 911  |
| RAD  | TGAAGTGAAGCCTTTGCGTTCAAGAAATGGGGTGGAGAAGAAGGTTTAGATGAGGAATG<br>*****            | 956  |
| 31Rp | GCAACGTCGTGAAGAAGGAAAGGCTCACAGAAGGGAGAAAAATACGAAAAGAAAATCAA                     | 1014 |
| 31Fp | GCAACGTCGTGAAGAAGGAAAGGCTCACAGAAGGGAGAAA-AATACGAAAAGAAAATCAA                    | 970  |
| RAD  | GCAACGTCGTGAAGAAGGAAAGGCTCACAGAAGGGAGAAAAATACGAAAAGAAAATCAA<br>*****            | 1016 |
| 31Rp | GGAAATGCGACTGAAAACAAGAGCTCAAGAATATACTAATAGATTAAGAGAAAAGAAGCA                    | 1074 |
| 31Fp | GGAAATGCGACTGAAAACAAGAGCTCAGGAATATACTAATAGATTA-GAAAAAGAAGCA                     | 1029 |
| RAD  | GGAAATGCGACTGAAAACAAGAGCTCAAGAATATACTAATAGATTAAGAGAAAAGAAGCA<br>*****           | 1076 |
| 31Rp | TGGGAAAGCCCATATTCATCATTTTGTAGTGATCCAGTTGATGGAGGTATTGATGAAGACGG                  | 1134 |
| 31Fp | TGGGAAAGCCCATATTCATCATTTTGTAGTGATCCAGTTGATGGAGGTATTGATGAAAACGG                  | 1089 |
| RAD  | TGGGAAAGCCCATATTCATCATTTTGTAGTGATCCAGTTGATGGAGGTATTGATGAAGACGG<br>*****         | 1136 |
| 31Rp | TTATCAAATTCAAAGAAA-----                                                         | 1152 |
| 31Fp | TTATCAATTCA-A-GAAGAAAGATGTAAGACGGCGGGCTA-A-ACTGAA-AA-TTGAATT                    | 1146 |
| RAD  | TTATCAAATTCAAAGAAGAAAGATGTAAGACGGCGGGCTA-GAAACTGAAGAA-TTGAATT<br>*****:*. * **. | 1196 |
| 31Rp | ----                                                                            | 1152 |
| 31Fp | TAA                                                                             | 1150 |
| RAD  | TAA                                                                             | 1200 |

## SOD1

|      |                                                                       |     |
|------|-----------------------------------------------------------------------|-----|
| 31FP | -----TTTGTCTAG                                                        | 8   |
| SOD1 | ---ATGGTCAAGCAGTCGCAGTGTTAAAGGGTGATGCCGGTGTCTCTGGTGTGTCAA             | 56  |
| 31RP | TTTTTCGTTCAAGCAGTCGCAGTGTTAAAGGGTGATGCCGGTGTCTCTGGTGTGTCAA<br>*****   | 60  |
| 31FP | GTTCGAACAGGCTTCCGAATCCGAGCCAACCACTGTCTCTTACGAGATCGCTGGTAACAG          | 68  |
| SOD1 | GTTCGAACAGGCTTCCGAATCCGAGCCAACCACTGTCTCTTACGAGATCGCTGGTAACAG          | 116 |
| 31RP | GTTCGAACAGGCTTCCGAATCCGAGCCAACCACTGTCTCTTACGAGATCGCTGGTAACAG<br>***** | 120 |
| 31FP | TCCTAACGCAAAACGTGGGTTCCACATTCATGATTTTGAAATGCCACCAAGGGTTGTGT           | 128 |
| SOD1 | TCCTAACGCAGAACGTGGGTTCCACATTCATGAGTTTGAGATGCCACCAATGGTTGTGT           | 176 |
| 31RP | TCCTAACGCAGAACGTGGGTTCCACATTCATGAGTTTGAGATGCCACCAATGGTTGTGT           | 180 |

```

*****
31FP      CTCTGCTGGTCCTCACTTCAATCCTTTCAAAAAACACATGGTGCTCCAACTGACAAAGT      188
SOD1      CTCTGCTGGTCCTCACTTCAATCCTTTCAAGAAGACACATGGTGCTCCAACTGACGAAGT      236
31RP      CTCTGCTGGTCCTCACTTCAATCCTTTCAAGAAGACACATGGTGCTCCAACTGACGAAGT      240
*****
31FP      CAAACATGTCGGTGACATGGGTAACGTAAAGACGGACAAAAATGGTGTGGCCAAGGGCTC      248
SOD1      CAGACATGTCGGTGACATGGGTAACGTAAAGACGGACAAAAATGGTGTGGCCAAGGGCTC      296
31RP      CAGACATGTCGGTGACATGGGTAACGTAAAGACGGACAAAAATGGTGTGGCCAAGGGCTC      300
*****
31FP      CTTCAAGGACTCTTTGATCAAGCTTATCGGTCCTACCTCCGTTGTAGGCAGAACCGTCTT      308
SOD1      CTTCAAGGACTCTTTGATCAAGCTTATCGGTCCTACCTCCGTTGTAGGCAGAAGCGTCGT      356
31RP      CTTCAAGGACTCTTTGATCAAGCTTATCGGTCCTACCTCCGTTGTAGGCAGAAGCGTCGT      360
*****
31FP      TATCCACGCCGCGCCAAAATGACTTAGGTAAGGGTGACACTGAAGAATCTTTGAAGACTGG      368
SOD1      TATCCACGCCGCGCCAAGATGACTTAGGTAAGGGTGACACTGAAGAATCTTTGAAGACTGG      416
31RP      TATCCACGCCGCGCCAAGATGACTTAGGTAAGGGTGACACTGAAGAATCTTTGAAGAACTG      420
*****
31FP      TAATGCCGGTCCAAGACCACCTGTGGTGTCATTGCTTAACCAACTAAAAAGAA      424
SOD1      TAATGCCGGTCCAAGACCAGCCTGTGGTGTCATTGCTTAACCAACTAA-----      465
31RP      GTAAGT-----      426
*  *

```
