# Supplementary material for: Saccharomyces cerevisiae DJ-1 paralogs maintain genome integrity through glycation repair of nucleic acids and proteins
Source: eLife journal article supplement (doi:10.7554/elife.88875), 2023-08-07
Supplement: supp [file Figure 1B graph.xlsx]

## Sheet: Sheet1
	Figure 1B Normalized densitomeric values
	WT	∆glo1	∆31	∆32	∆33	∆34
	1	6.34302	3.78519	3.50562	3.65069	3.76014
	1.06353	6.14125	3.7355	3.43701	3.57857	3.87474
	1.01894	6.02013	3.93219	3.52039	3.51823	3.67355
