# Supplementary material for: Saccharomyces cerevisiae DJ-1 paralogs maintain genome integrity through glycation repair of nucleic acids and proteins
Source: eLife journal article supplement (doi:10.7554/elife.88875), 2023-08-07
Supplement: supp [file Figure 1C graph.xlsx]

## Sheet: Sheet1
	Figure 1C Normalized densitomeric values
	WT	∆glo1	∆31/32	∆32/33	∆33/34	∆T	∆Q
	1	13.774	8.945	7.28434	8.08587	21.2697	20.2776
	1.03	10.3091	10.1845	8.7987	10.4062	20.7632	22.326
	0.986	11.964	9.4854	8.1953	8.5621	19.561	21.7613
