# Supplementary material for: Saccharomyces cerevisiae DJ-1 paralogs maintain genome integrity through glycation repair of nucleic acids and proteins
Source: eLife journal article supplement (doi:10.7554/elife.88875), 2023-08-07
Supplement: supp [file Figure 1D graph.xlsx]

## Sheet: Sheet1
	Figure 1D Normalized densitomeric values
	WT	∆glo1	∆31/32	∆32/33	∆33/34	∆T	∆Q
	1	6.63296	1.64077	1.2	1.34071	0.9321
	0.983	5.432	1.987	0.99	1.321	1.211
	0.97	5.9987	2.143	0.982	0.992	1.312
