# Supplementary material for: Saccharomyces cerevisiae DJ-1 paralogs maintain genome integrity through glycation repair of nucleic acids and proteins
Source: eLife journal article supplement (doi:10.7554/elife.88875), 2023-08-07
Supplement: supp [file Figure 1E graph.xlsx]

## Sheet: Sheet1
	Figure 1E Normalized densitomeric values
	WT	∆glo1	∆31/32	∆32/33	∆33/34	∆T	∆Q
	1	8.30343	1.6646	1.66573	3.3179	2.09193	2.943
	1.04	7.63	2.678	2.987	2.552	2.987	2.956
	0.98	7.86	1.987	1.852	1.986	2.532	2.674
