# Supplementary material for: Saccharomyces cerevisiae DJ-1 paralogs maintain genome integrity through glycation repair of nucleic acids and proteins
Source: eLife journal article supplement (doi:10.7554/elife.88875), 2023-08-07
Supplement: supp [file Figure 2A graph.xlsx]

## Sheet: Sheet1
	Figure 2A Normalized densitomeric values
	WT	∆glo1	∆31	∆32	∆33	∆34
	1	4.40149	1.20417	1.35516	1.91544	1.06522
	0.9	5.87017	1.58329	1.68902	1.73281	1.35692
	0.95	6.17022	1.6921	1.22809	1.48912	1.53719
