# Supplementary material for: Saccharomyces cerevisiae DJ-1 paralogs maintain genome integrity through glycation repair of nucleic acids and proteins
Source: eLife journal article supplement (doi:10.7554/elife.88875), 2023-08-07
Supplement: supp [file Figure 2B graph.xlsx]

## Sheet: Sheet1
	Figure 2B Normalized densitomeric values
	WT	∆glo1	∆31/32	∆32/33	∆33/34	∆T	∆Q
	1	8.20528	7.95169	8.5858	7.66359	14.2966	16.3653
	1.3	6.70982	6.99832	7.85279	6.53798	13.279	15.0811
	0.97	7.35892	7.14178	6.93153	8.0238	14.8322	16.6313
