# Supplementary material for: Saccharomyces cerevisiae DJ-1 paralogs maintain genome integrity through glycation repair of nucleic acids and proteins
Source: eLife journal article supplement (doi:10.7554/elife.88875), 2023-08-07
Supplement: supp [file Figure 2C graph.xlsx]

## Sheet: Sheet1
	Figure 2C Normalized densitomeric values
	WT	∆glo1	∆31	∆32	∆33	∆34
	1	15.7256	7.59621	6.35934	7.25195	4.82465
	1.03	14.72	6.635	6.214	6.8701	6.6728
	0.98	15.023	7.0321	7.1945	7.6268	7.4213
