# Supplementary material for: Saccharomyces cerevisiae DJ-1 paralogs maintain genome integrity through glycation repair of nucleic acids and proteins
Source: eLife journal article supplement (doi:10.7554/elife.88875), 2023-08-07
Supplement: supp [file Figure 2D graph.xlsx]

## Sheet: Sheet1
	Figure 2D Normalized densitomeric values
	WT	∆glo1	∆31/32	∆32/33	∆33/34	∆T	∆Q
	1	6.1668	4.91274	5.4402	4.00736	7.23051	6.473
	0.97	6.78636	5.13768	6.13647	5.82139	7.61236	7.23459
	1.3	5.99347	6.24679	5.28901	6.14788	6.93452	7.13468
