# Supplementary material for: Saccharomyces cerevisiae DJ-1 paralogs maintain genome integrity through glycation repair of nucleic acids and proteins
Source: eLife journal article supplement (doi:10.7554/elife.88875), 2023-08-07
Supplement: supp [file Figure 2E graph.xlsx]

## Sheet: Sheet1
		FIGURE 2E POLYSOME PROFILE RAW VALUES
		WT-GO			WT+GO			∆Q-GO			∆Q+GO
	25.02	0.130455		25.02	0.026551		25.02	0.082732		25.02	0.189457
	25.06	0.128912		25.06	0.026648		25.06	0.081802		25.06	0.187382
	25.1	0.126457		25.1	0.026886		25.1	0.081343		25.1	0.185358
	25.14	0.123443		25.14	0.027531		25.14	0.080418		25.14	0.183428
	25.18	0.120752		25.18	0.027192		25.18	0.08034		25.18	0.18158
	25.22	0.118575		25.22	0.027726		25.22	0.081499		25.22	0.179875
	25.26	0.116065		25.26	0.028283		25.26	0.080652		25.26	0.178153
	25.3	0.112466		25.3	0.029268		25.3	0.081042		25.3	0.178305
	25.34	0.110066		25.34	0.029911		25.34	0.081736		25.34	0.176004
	25.38	0.107479		25.38	0.030807		25.38	0.082801		25.38	0.175108
	25.41	0.10513		25.41	0.031915		25.41	0.084847		25.41	0.17462
	25.45	0.103898		25.45	0.033429		25.45	0.085893		25.45	0.17466
	25.49	0.100775		25.49	0.035143		25.49	0.087701		25.49	0.175184
	25.53	0.098424		25.53	0.036833		25.53	0.08992		25.53	0.176114
	25.57	0.09597		25.57	0.038907		25.57	0.093077		25.57	0.177901
	25.61	0.093322		25.61	0.041397		25.61	0.096351		25.61	0.179368
	25.65	0.090954		25.65	0.044326		25.65	0.100446		25.65	0.181762
	25.69	0.089261		25.69	0.047517		25.69	0.105091		25.69	0.184532
	25.73	0.087713		25.73	0.050893		25.73	0.110278		25.73	0.188214
	25.77	0.085713		25.77	0.055245		25.77	0.116292		25.77	0.19337
	25.8	0.082919		25.8	0.060053		25.8	0.122864		25.8	0.198741
	25.85	0.081148		25.85	0.065328		25.85	0.130971		25.85	0.20512
	25.88	0.079376		25.88	0.071141		25.88	0.140049		25.88	0.212798
	25.92	0.077566		25.92	0.077452		25.92	0.149793		25.92	0.221258
	25.96	0.076073		25.96	0.084247		25.96	0.161564		25.96	0.230981
	26	0.074402		26	0.091867		26	0.173292		26	0.242051
	26.04	0.073183		26.04	0.100087		26.04	0.187766		26.04	0.254633
	26.08	0.071588		26.08	0.109162		26.08	0.202752		26.08	0.268104
	26.12	0.070535		26.12	0.119362		26.12	0.2194		26.12	0.284382
	26.16	0.069751		26.16	0.130085		26.16	0.237179		26.16	0.302264
	26.2	0.069321		26.2	0.141199		26.2	0.256519		26.2	0.322068
	26.24	0.068152		26.24	0.153383		26.24	0.279166		26.24	0.343165
	26.28	0.067785		26.28	0.166687		26.28	0.303022		26.28	0.367218
	26.32	0.066703		26.32	0.180233		26.32	0.327809		26.32	0.393068
	26.36	0.066593		26.36	0.194008		26.36	0.35469		26.36	0.420464
	26.4	0.066638		26.4	0.209227		26.4	0.383767		26.4	0.451718
	26.43	0.066463		26.43	0.224574		26.43	0.413528		26.43	0.48515
	26.47	0.066401		26.47	0.240889		26.47	0.445084		26.47	0.519195
	26.51	0.06708		26.51	0.25724		26.51	0.476232		26.51	0.555187
	26.55	0.067676		26.55	0.274281		26.55	0.510334		26.55	0.594013
	26.59	0.068667		26.59	0.29197		26.59	0.547708		26.59	0.633685
	26.63	0.069603		26.63	0.309796		26.63	0.586263		26.63	0.675133
	26.67	0.070903		26.67	0.327665		26.67	0.624762		26.67	0.716473
	26.7	0.072039		26.7	0.346326		26.7	0.662078		26.7	0.761025
	26.75	0.073958		26.75	0.364412		26.75	0.703483		26.75	0.805215
	26.79	0.076246		26.79	0.381198		26.79	0.742758		26.79	0.854825
	26.82	0.078966		26.82	0.398808		26.82	0.780388		26.82	0.902976
	26.86	0.08189		26.86	0.416843		26.86	0.816673		26.86	0.952133
	26.9	0.085086		26.9	0.43435		26.9	0.852568		26.9	1.00241
	26.94	0.089706		26.94	0.451492		26.94	0.891381		26.94	1.05486
	26.98	0.093734		26.98	0.467826		26.98	0.927124		26.98	1.10648
	27.02	0.098609		27.02	0.483996		27.02	0.962864		27.02	1.15779
	27.06	0.104422		27.06	0.499617		27.06	0.996195		27.06	1.20802
	27.1	0.110849		27.1	0.513694		27.1	1.03256		27.1	1.25821
	27.14	0.118079		27.14	0.527187		27.14	1.06579		27.14	1.3073
	27.18	0.126908		27.18	0.539362		27.18	1.09681		27.18	1.35821
	27.22	0.135298		27.22	0.551198		27.22	1.12808		27.22	1.40694
	27.26	0.145123		27.26	0.562092		27.26	1.15498		27.26	1.45463
	27.29	0.156327		27.29	0.571559		27.29	1.17823		27.29	1.49868
	27.33	0.1686		27.33	0.579982		27.33	1.20314		27.33	1.54342
	27.37	0.182462		27.37	0.587786		27.37	1.22779		27.37	1.58342
	27.41	0.196038		27.41	0.594372		27.41	1.24867		27.41	1.61956
	27.45	0.211834		27.45	0.600914		27.45	1.268		27.45	1.65445
	27.49	0.228775		27.49	0.605103		27.49	1.28617		27.49	1.68935
	27.53	0.247327		27.53	0.609268		27.53	1.30159		27.53	1.72321
	27.57	0.267381		27.57	0.61312		27.57	1.31544		27.57	1.7526
	27.61	0.288766		27.61	0.61539		27.61	1.32585		27.61	1.78103
	27.65	0.312152		27.65	0.616934		27.65	1.3336		27.65	1.80797
	27.69	0.335776		27.69	0.617765		27.69	1.34006		27.69	1.83344
	27.73	0.361043		27.73	0.6174		27.73	1.34602		27.73	1.85627
	27.76	0.387395		27.76	0.615635		27.76	1.34898		27.76	1.8763
	27.8	0.414606		27.8	0.613385		27.8	1.35101		27.8	1.89434
	27.84	0.444241		27.84	0.609887		27.84	1.35309		27.84	1.90898
	27.88	0.474708		27.88	0.60577		27.88	1.35324		27.88	1.92203
	27.92	0.503855		27.92	0.600922		27.92	1.35063		27.92	1.93176
	27.96	0.535547		27.96	0.595977		27.96	1.34779		27.96	1.94046
	28	0.56784		28	0.590802		28	1.34228		28	1.94753
	28.04	0.599683		28.04	0.584666		28.04	1.33669		28.04	1.95136
	28.08	0.632016		28.08	0.578078		28.08	1.32946		28.08	1.95477
	28.11	0.665139		28.11	0.570462		28.11	1.32133		28.11	1.95495
	28.16	0.698562		28.16	0.563241		28.16	1.31136		28.16	1.95244
	28.2	0.729418		28.2	0.555456		28.2	1.30079		28.2	1.9496
	28.24	0.761865		28.24	0.546962		28.24	1.2901		28.24	1.94449
	28.27	0.79345		28.27	0.538344		28.27	1.27719		28.27	1.93829
	28.31	0.823488		28.31	0.52957		28.31	1.26421		28.31	1.93108
	28.35	0.85312		28.35	0.521482		28.35	1.24936		28.35	1.92057
	28.39	0.882703		28.39	0.512554		28.39	1.23445		28.39	1.91032
	28.43	0.911811		28.43	0.503143		28.43	1.22008		28.43	1.89895
	28.47	0.938118		28.47	0.493525		28.47	1.20455		28.47	1.88548
	28.51	0.964661		28.51	0.484041		28.51	1.18934		28.51	1.87234
	28.55	0.990074		28.55	0.474298		28.55	1.17317		28.55	1.85766
	28.59	1.0128		28.59	0.464537		28.59	1.15624		28.59	1.84344
	28.63	1.03325		28.63	0.455029		28.63	1.13942		28.63	1.82722
	28.66	1.05338		28.66	0.446275		28.66	1.12156		28.66	1.8101
	28.71	1.07283		28.71	0.437507		28.71	1.1039		28.71	1.79224
	28.75	1.09001		28.75	0.427939		28.75	1.08641		28.75	1.77223
	28.78	1.10563		28.78	0.419037		28.78	1.06684		28.78	1.75361
	28.82	1.11728		28.82	0.406299		28.82	1.04899		28.82	1.72765
	28.87	1.12699		28.87	0.397437		28.87	1.0309		28.87	1.70893
	28.91	1.13845		28.91	0.38894		28.91	1.0127		28.91	1.69017
	28.94	1.14992		28.94	0.380765		28.94	0.994076		28.94	1.67085
	28.98	1.15729		28.98	0.371536		28.98	0.977217		28.98	1.65039
	29.02	1.1623		29.02	0.363454		29.02	0.958674		29.02	1.6298
	29.06	1.16635		29.06	0.355147		29.06	0.94095		29.06	1.60865
	29.1	1.16949		29.1	0.347578		29.1	0.923727		29.1	1.58703
	29.14	1.17057		29.14	0.339177		29.14	0.906386		29.14	1.56483
	29.18	1.16996		29.18	0.330399		29.18	0.890131		29.18	1.54231
	29.22	1.16679		29.22	0.321592		29.22	0.873368		29.22	1.51917
	29.25	1.1619		29.25	0.31436		29.25	0.856566		29.25	1.49583
	29.3	1.15727		29.3	0.307226		29.3	0.839527		29.3	1.4732
	29.33	1.15253		29.33	0.299549		29.33	0.822644		29.33	1.45255
	29.37	1.14584		29.37	0.292275		29.37	0.808126		29.37	1.43314
	29.41	1.13794		29.41	0.285448		29.41	0.792888		29.41	1.41158
	29.45	1.1298		29.45	0.278076		29.45	0.776488		29.45	1.39126
	29.49	1.12004		29.49	0.271789		29.49	0.761262		29.49	1.3709
	29.53	1.10976		29.53	0.265997		29.53	0.746538		29.53	1.3491
	29.57	1.09904		29.57	0.260025		29.57	0.732138		29.57	1.3283
	29.61	1.08701		29.61	0.253727		29.61	0.71783		29.61	1.30732
	29.65	1.07461		29.65	0.247022		29.65	0.703152		29.65	1.2868
	29.68	1.06204		29.68	0.240476		29.68	0.688888		29.68	1.26597
	29.73	1.04858		29.73	0.234301		29.73	0.676027		29.73	1.2463
	29.77	1.03462		29.77	0.228282		29.77	0.663303		29.77	1.22716
	29.8	1.02097		29.8	0.223234		29.8	0.651405		29.8	1.20847
	29.84	1.00751		29.84	0.218476		29.84	0.639437		29.84	1.18942
	29.88	0.99282		29.88	0.214373		29.88	0.626283		29.88	1.17124
	29.92	0.978501		29.92	0.210398		29.92	0.614481		29.92	1.15197
	29.96	0.96419		29.96	0.206469		29.96	0.602882		29.96	1.13222
	30	0.949132		30	0.202423		30	0.591056		30	1.11394
	30.04	0.933337		30.04	0.198563		30.04	0.578676		30.04	1.09624
	30.08	0.918227		30.08	0.195468		30.08	0.567275		30.08	1.0784
	30.12	0.90346		30.12	0.191769		30.12	0.556604		30.12	1.06121
	30.15	0.888304		30.15	0.188278		30.15	0.547089		30.15	1.04498
	30.2	0.873362		30.2	0.184999		30.2	0.536931		30.2	1.02934
	30.24	0.85777		30.24	0.181801		30.24	0.526854		30.24	1.01277
	30.28	0.841869		30.28	0.178371		30.28	0.516176		30.28	0.995959
	30.31	0.827071		30.31	0.174889		30.31	0.505581		30.31	0.980668
	30.35	0.812207		30.35	0.171455		30.35	0.496411		30.35	0.965995
	30.39	0.797163		30.39	0.167983		30.39	0.486987		30.39	0.950284
	30.43	0.782193		30.43	0.164734		30.43	0.478025		30.43	0.935713
	30.47	0.768255		30.47	0.162033		30.47	0.469469		30.47	0.921799
	30.51	0.754161		30.51	0.159191		30.51	0.460698		30.51	0.90769
	30.55	0.742107		30.55	0.156547		30.55	0.451287		30.55	0.894069
	30.59	0.726372		30.59	0.153827		30.59	0.44279		30.59	0.880391
	30.63	0.712287		30.63	0.151251		30.63	0.435396		30.63	0.867466
	30.66	0.697748		30.66	0.148937		30.66	0.427532		30.66	0.852592
	30.71	0.683899		30.71	0.146782		30.71	0.419758		30.71	0.839928
	30.74	0.670953		30.74	0.144491		30.74	0.412048		30.74	0.82735
	30.78	0.658117		30.78	0.142353		30.78	0.405847		30.78	0.814613
	30.82	0.645972		30.82	0.139716		30.82	0.39998		30.82	0.801437
	30.86	0.634083		30.86	0.137117		30.86	0.39129		30.86	0.788531
	30.9	0.622551		30.9	0.134748		30.9	0.383994		30.9	0.776105
	30.94	0.610927		30.94	0.132667		30.94	0.376206		30.94	0.76292
	30.98	0.599298		30.98	0.130274		30.98	0.368629		30.98	0.750908
	31.02	0.588518		31.02	0.12806		31.02	0.361687		31.02	0.738827
	31.06	0.578312		31.06	0.126093		31.06	0.355179		31.06	0.727458
	31.1	0.567995		31.1	0.124266		31.1	0.348399		31.1	0.717173
	31.14	0.557613		31.14	0.122568		31.14	0.341678		31.14	0.706097
	31.17	0.547141		31.17	0.120865		31.17	0.335234		31.17	0.695981
	31.21	0.537092		31.21	0.118594		31.21	0.32953		31.21	0.685235
	31.25	0.527393		31.25	0.116494		31.25	0.323678		31.25	0.675079
	31.29	0.517518		31.29	0.11463		31.29	0.317419		31.29	0.665686
	31.33	0.508676		31.33	0.113306		31.33	0.311389		31.33	0.655714
	31.37	0.500126		31.37	0.111419		31.37	0.305336		31.37	0.646062
	31.41	0.491315		31.41	0.109692		31.41	0.300424		31.41	0.637093
	31.45	0.483024		31.45	0.108311		31.45	0.295065		31.45	0.627426
	31.49	0.475245		31.49	0.106595		31.49	0.289075		31.49	0.617248
	31.53	0.467601		31.53	0.104623		31.53	0.283913		31.53	0.6074
	31.57	0.459477		31.57	0.103049		31.57	0.279447		31.57	0.598289
	31.61	0.451412		31.61	0.101425		31.61	0.273777		31.61	0.588791
	31.64	0.443365		31.64	0.099756		31.64	0.268759		31.64	0.580174
	31.68	0.436049		31.68	0.098074		31.68	0.264615		31.68	0.571368
	31.72	0.428994		31.72	0.09678		31.72	0.260502		31.72	0.562693
	31.76	0.421873		31.76	0.095286		31.76	0.255589		31.76	0.554012
	31.8	0.415936		31.8	0.093632		31.8	0.250915		31.8	0.545266
	31.84	0.409278		31.84	0.092456		31.84	0.246456		31.84	0.537711
	31.88	0.403542		31.88	0.091232		31.88	0.24227		31.88	0.533863
	31.92	0.397205		31.92	0.08988		31.92	0.238298		31.92	0.52516
	31.96	0.390812		31.96	0.088352		31.96	0.233908		31.96	0.517417
	32	0.384915		32	0.086867		32	0.229945		32	0.509734
	32.04	0.379679		32.04	0.085685		32.04	0.226163		32.04	0.502355
	32.08	0.373978		32.08	0.084402		32.08	0.222369		32.08	0.495737
	32.12	0.367586		32.12	0.083295		32.12	0.219053		32.12	0.487225
	32.16	0.361906		32.16	0.081975		32.16	0.214442		32.16	0.47992
	32.19	0.356846		32.19	0.080912		32.19	0.210535		32.19	0.473306
	32.23	0.352464		32.23	0.080098		32.23	0.206739		32.23	0.466045
	32.27	0.347126		32.27	0.079074		32.27	0.203115		32.27	0.459016
	32.31	0.341881		32.31	0.078105		32.31	0.199417		32.31	0.452775
	32.35	0.337119		32.35	0.076419		32.35	0.196314		32.35	0.445415
	32.39	0.332001		32.39	0.075434		32.39	0.192667		32.39	0.439023
	32.43	0.327409		32.43	0.074509		32.43	0.189512		32.43	0.432896
	32.47	0.323111		32.47	0.073368		32.47	0.186976		32.47	0.427397
	32.51	0.319084		32.51	0.072347		32.51	0.184881		32.51	0.421579
	32.55	0.314423		32.55	0.071206		32.55	0.181943		32.55	0.415118
	32.59	0.309891		32.59	0.070401		32.59	0.17877		32.59	0.409053
	32.63	0.30567		32.63	0.069284		32.63	0.175822		32.63	0.403198
	32.67	0.301577		32.67	0.068448		32.67	0.17295		32.67	0.397157
	32.71	0.296978		32.71	0.067426		32.71	0.170245		32.71	0.391415
	32.74	0.292447		32.74	0.066406		32.74	0.167996		32.74	0.385972
	32.78	0.287944		32.78	0.065642		32.78	0.165797		32.78	0.38103
	32.83	0.284098		32.83	0.064793		32.83	0.163578		32.83	0.375156
	32.86	0.280564		32.86	0.063825		32.86	0.161486		32.86	0.368663
	32.9	0.277042		32.9	0.063132		32.9	0.15925		32.9	0.36333
	32.94	0.273885		32.94	0.062775		32.94	0.156787		32.94	0.358126
	32.98	0.269822		32.98	0.062362		32.98	0.154628		32.98	0.353444
	33.02	0.26675		33.02	0.061715		33.02	0.152483		33.02	0.349567
	33.06	0.263557		33.06	0.060892		33.06	0.150879		33.06	0.346269
	33.1	0.260109		33.1	0.059962		33.1	0.149057		33.1	0.341407
	33.14	0.256362		33.14	0.059028		33.14	0.147212		33.14	0.336926
	33.18	0.253073		33.18	0.058047		33.18	0.144669		33.18	0.333118
	33.21	0.250454		33.21	0.05739		33.21	0.142301		33.21	0.328151
	33.26	0.247215		33.26	0.056636		33.26	0.140736		33.26	0.324102
	33.29	0.244066		33.29	0.055918		33.29	0.139138		33.29	0.319519
	33.33	0.240823		33.33	0.05548		33.33	0.137301		33.33	0.315184
	33.37	0.237676		33.37	0.055117		33.37	0.135266		33.37	0.311539
	33.41	0.235129		33.41	0.054278		33.41	0.133425		33.41	0.307973
	33.45	0.231912		33.45	0.053598		33.45	0.132164		33.45	0.304783
	33.49	0.228761		33.49	0.053146		33.49	0.130483		33.49	0.300615
	33.53	0.225759		33.53	0.052787		33.53	0.129294		33.53	0.296979
	33.57	0.223136		33.57	0.052411		33.57	0.128096		33.57	0.293478
	33.61	0.220233		33.61	0.051826		33.61	0.127022		33.61	0.29026
	33.65	0.217606		33.65	0.051221		33.65	0.125747		33.65	0.286577
	33.68	0.215369		33.68	0.051415		33.68	0.124451		33.68	0.282874
	33.72	0.212993		33.72	0.050467		33.72	0.123362		33.72	0.279511
	33.76	0.210448		33.76	0.049975		33.76	0.122591		33.76	0.276807
	33.8	0.208262		33.8	0.049599		33.8	0.121224		33.8	0.27372
	33.84	0.205917		33.84	0.049224		33.84	0.120434		33.84	0.271017
	33.88	0.203924		33.88	0.048651		33.88	0.119475		33.88	0.267981
	33.92	0.201486		33.92	0.048214		33.92	0.118519		33.92	0.265741
	33.96	0.199378		33.96	0.047969		33.96	0.11767		33.96	0.265119
	34	0.197261		34	0.047677		34	0.116867		34	0.261737
	34.04	0.195183		34.04	0.0476		34.04	0.11644		34.04	0.259655
	34.08	0.193389		34.08	0.047194		34.08	0.115793		34.08	0.257309
	34.12	0.191748		34.12	0.046907		34.12	0.114936		34.12	0.254905
	34.15	0.189562		34.15	0.046814		34.15	0.1145		34.15	0.252612
	34.2	0.187613		34.2	0.04659		34.2	0.114049		34.2	0.250227
	34.23	0.186116		34.23	0.046457		34.23	0.114016		34.23	0.24851
	34.28	0.184308		34.28	0.046509		34.28	0.113545		34.28	0.246377
	34.31	0.182619		34.31	0.046881		34.31	0.113197		34.31	0.244165
	34.35	0.180705		34.35	0.046646		34.35	0.113159		34.35	0.242052
	34.39	0.178908		34.39	0.046638		34.39	0.11285		34.39	0.240563
	34.43	0.176952		34.43	0.046695		34.43	0.112856		34.43	0.238711
	34.47	0.175326		34.47	0.04684		34.47	0.112981		34.47	0.236756
	34.51	0.173701		34.51	0.046902		34.51	0.113454		34.51	0.235229
	34.55	0.172239		34.55	0.047057		34.55	0.114218		34.55	0.233937
	34.59	0.170708		34.59	0.047123		34.59	0.114512		34.59	0.232532
	34.63	0.169338		34.63	0.047355		34.63	0.115076		34.63	0.230993
	34.67	0.167901		34.67	0.047674		34.67	0.115659		34.67	0.229929
	34.71	0.166565		34.71	0.048131		34.71	0.116581		34.71	0.228837
	34.74	0.165276		34.74	0.048806		34.74	0.117947		34.74	0.228668
	34.78	0.164096		34.78	0.049434		34.78	0.118925		34.78	0.228536
	34.82	0.162878		34.82	0.050002		34.82	0.120299		34.82	0.228432
	34.86	0.161551		34.86	0.05071		34.86	0.122		34.86	0.228958
	34.9	0.160243		34.9	0.051362		34.9	0.123773		34.9	0.229819
	34.94	0.159494		34.94	0.052387		34.94	0.125814		34.94	0.230735
	34.98	0.158271		34.98	0.053528		34.98	0.128316		34.98	0.231131
	35.02	0.156731		35.02	0.054623		35.02	0.13086		35.02	0.232183
	35.06	0.155574		35.06	0.055918		35.06	0.133519		35.06	0.233164
	35.1	0.15445		35.1	0.05749		35.1	0.136629		35.1	0.234076
	35.14	0.15345		35.14	0.058858		35.14	0.139878		35.14	0.234991
	35.17	0.15246		35.17	0.0604		35.17	0.143243		35.17	0.236894
	35.22	0.151611		35.22	0.062027		35.22	0.146936		35.22	0.238804
	35.25	0.15024		35.25	0.063849		35.25	0.151261		35.25	0.240962
	35.29	0.149341		35.29	0.065996		35.29	0.156142		35.29	0.243824
	35.33	0.148268		35.33	0.0683		35.33	0.161674		35.33	0.247429
	35.37	0.147636		35.37	0.070907		35.37	0.167264		35.37	0.250835
	35.41	0.146971		35.41	0.073898		35.41	0.173191		35.41	0.254974
	35.45	0.145722		35.45	0.076926		35.45	0.179314		35.45	0.259858
	35.49	0.145792		35.49	0.080489		35.49	0.186604		35.49	0.265022
	35.53	0.145111		35.53	0.083822		35.53	0.194729		35.53	0.271146
	35.57	0.14425		35.57	0.08767		35.57	0.203671		35.57	0.277706
	35.61	0.143361		35.61	0.091608		35.61	0.212198		35.61	0.284799
	35.65	0.14233		35.65	0.096109		35.65	0.221508		35.65	0.291779
	35.69	0.141625		35.69	0.101318		35.69	0.231518		35.69	0.298952
	35.73	0.141351		35.73	0.106473		35.73	0.242584		35.73	0.307162
	35.77	0.140943		35.77	0.112241		35.77	0.253565		35.77	0.316705
	35.8	0.140511		35.8	0.118515		35.8	0.265723		35.8	0.326553
	35.84	0.14042		35.84	0.124714		35.84	0.276758		35.84	0.337203
	35.88	0.140189		35.88	0.131142		35.88	0.288884		35.88	0.348562
	35.92	0.139862		35.92	0.137559		35.92	0.302162		35.92	0.359925
	35.96	0.139636		35.96	0.144475		35.96	0.316795		35.96	0.372147
	36	0.139917		36	0.151953		36	0.330788		36	0.384783
	36.04	0.139927		36.04	0.160474		36.04	0.345071		36.04	0.39739
	36.08	0.139903		36.08	0.168663		36.08	0.36002		36.08	0.410664
	36.12	0.140198		36.12	0.176495		36.12	0.37519		36.12	0.425286
	36.16	0.140616		36.16	0.184584		36.16	0.390872		36.16	0.440546
	36.19	0.140899		36.19	0.19344		36.19	0.405941		36.19	0.455643
	36.23	0.141282		36.23	0.202365		36.23	0.421085		36.23	0.471127
	36.28	0.142349		36.28	0.21109		36.28	0.43669		36.28	0.487383
	36.31	0.143042		36.31	0.220345		36.31	0.452433		36.31	0.503395
	36.35	0.143987		36.35	0.230278		36.35	0.467506		36.35	0.520263
	36.39	0.144894		36.39	0.240051		36.39	0.482773		36.39	0.537732
	36.43	0.146039		36.43	0.249189		36.43	0.497842		36.43	0.554666
	36.47	0.147331		36.47	0.258405		36.47	0.512506		36.47	0.570996
	36.51	0.148793		36.51	0.267665		36.51	0.526487		36.51	0.587553
	36.55	0.150186		36.55	0.276798		36.55	0.540594		36.55	0.604191
	36.59	0.152216		36.59	0.28589		36.59	0.554739		36.59	0.620121
	36.62	0.154634		36.62	0.294681		36.62	0.568472		36.62	0.637183
	36.66	0.157037		36.66	0.302885		36.66	0.581039		36.66	0.653433
	36.71	0.159569		36.71	0.310871		36.71	0.59194		36.71	0.669355
	36.75	0.162307		36.75	0.318802		36.75	0.603		36.75	0.685008
	36.79	0.165664		36.79	0.325886		36.79	0.614645		36.79	0.700208
	36.82	0.169605		36.82	0.332738		36.82	0.625254		36.82	0.713899
	36.86	0.173682		36.86	0.33966		36.86	0.63513		36.86	0.727335
	36.9	0.178082		36.9	0.346001		36.9	0.643388		36.9	0.739986
	36.94	0.183414		36.94	0.351516		36.94	0.651785		36.94	0.753161
	36.98	0.188187		36.98	0.356077		36.98	0.659119		36.98	0.766519
	37.02	0.194237		37.02	0.3601		37.02	0.665609		37.02	0.778203
	37.06	0.200579		37.06	0.364229		37.06	0.671624		37.06	0.788668
	37.1	0.207309		37.1	0.368111		37.1	0.676719		37.1	0.798748
	37.14	0.214986		37.14	0.371262		37.14	0.682386		37.14	0.80835
	37.18	0.223424		37.18	0.374017		37.18	0.686318		37.18	0.817848
	37.21	0.232357		37.21	0.375744		37.21	0.690428		37.21	0.827255
	37.26	0.241345		37.26	0.377713		37.26	0.692474		37.26	0.834379
	37.29	0.250892		37.29	0.379377		37.29	0.693522		37.29	0.841714
	37.33	0.262159		37.33	0.379887		37.33	0.693986		37.33	0.848078
	37.37	0.273598		37.37	0.379978		37.37	0.693535		37.37	0.853443
	37.41	0.284993		37.41	0.379615		37.41	0.692367		37.41	0.858034
	37.45	0.297932		37.45	0.379034		37.45	0.690716		37.45	0.861903
	37.49	0.312656		37.49	0.3777		37.49	0.6893		37.49	0.865029
	37.53	0.327667		37.53	0.376098		37.53	0.687224		37.53	0.86751
	37.56	0.342041		37.56	0.373967		37.56	0.684141		37.56	0.869075
	37.61	0.355651		37.61	0.371455		37.61	0.679386		37.61	0.870208
	37.64	0.371144		37.64	0.368664		37.64	0.674489		37.64	0.870351
	37.69	0.386673		37.69	0.366177		37.69	0.669931		37.69	0.86975
	37.72	0.402684		37.72	0.362739		37.72	0.664872		37.72	0.868798
	37.76	0.419503		37.76	0.358794		37.76	0.658763		37.76	0.866446
	37.8	0.436384		37.8	0.354801		37.8	0.652222		37.8	0.863908
	37.84	0.454616		37.84	0.351139		37.84	0.646095		37.84	0.860885
	37.88	0.472844		37.88	0.347135		37.88	0.639254		37.88	0.858218
	37.92	0.489464		37.92	0.342934		37.92	0.632251		37.92	0.854943
	37.96	0.506537		37.96	0.338429		37.96	0.625133		37.96	0.850552
	38	0.524186		38	0.333799		38	0.617511		38	0.845575
	38.04	0.541232		38.04	0.329068		38.04	0.61001		38.04	0.840889
	38.08	0.557562		38.08	0.324788		38.08	0.602128		38.08	0.835246
	38.12	0.572813		38.12	0.32003		38.12	0.593987		38.12	0.829321
	38.16	0.588792		38.16	0.314969		38.16	0.586394		38.16	0.823073
	38.19	0.603853		38.19	0.310121		38.19	0.578128		38.19	0.817099
	38.24	0.619053		38.24	0.305417		38.24	0.56946		38.24	0.810551
	38.27	0.634002		38.27	0.300884		38.27	0.561323		38.27	0.803355
	38.31	0.646323		38.31	0.2964		38.31	0.553502		38.31	0.795935
	38.35	0.658292		38.35	0.291675		38.35	0.545424		38.35	0.788032
	38.39	0.671227		38.39	0.286834		38.39	0.537416		38.39	0.780636
	38.43	0.682379		38.43	0.282412		38.43	0.528748		38.43	0.773187
	38.47	0.692123		38.47	0.278157		38.47	0.521159		38.47	0.765357
	38.51	0.700538		38.51	0.273546		38.51	0.513362		38.51	0.757974
	38.54	0.708973		38.54	0.269569		38.54	0.505632		38.54	0.749815
	38.59	0.717821		38.59	0.264682		38.59	0.498175		38.59	0.741848
	38.62	0.724934		38.62	0.26023		38.62	0.490403		38.62	0.734086
	38.66	0.730102		38.66	0.255981		38.66	0.48276		38.66	0.725699
	38.7	0.734566		38.7	0.251985		38.7	0.475883		38.7	0.717179
	38.74	0.73901		38.74	0.248184		38.74	0.46913		38.74	0.708795
	38.78	0.7431		38.78	0.244559		38.78	0.462125		38.78	0.700487
	38.82	0.744943		38.82	0.24092		38.82	0.455048		38.82	0.692192
	38.86	0.745558		38.86	0.237127		38.86	0.448053		38.86	0.683909
	38.9	0.745963		38.9	0.233842		38.9	0.44152		38.9	0.675606
	38.94	0.746044		38.94	0.230487		38.94	0.434758		38.94	0.66722
	39	0.745449		39	0.227094		39	0.428104		39	0.658811
	39.04	0.744337		39.04	0.223801		39.04	0.422033		39.04	0.650581
	39.08	0.741465		39.08	0.220757		39.08	0.412089		39.08	0.642375
	39.12	0.738672		39.12	0.21821		39.12	0.406386		39.12	0.633635
	39.16	0.735743		39.16	0.21509		39.16	0.400569		39.16	0.626152
	39.2	0.732175		39.2	0.212066		39.2	0.394459		39.2	0.619117
	39.24	0.728311		39.24	0.209888		39.24	0.388866		39.24	0.612107
	39.27	0.724041		39.27	0.206763		39.27	0.383472		39.27	0.604601
	39.31	0.719179		39.31	0.203998		39.31	0.378172		39.31	0.597276
	39.35	0.712998		39.35	0.201391		39.35	0.372574		39.35	0.590398
	39.39	0.706219		39.39	0.198752		39.39	0.367702		39.39	0.583406
	39.43	0.699679		39.43	0.196182		39.43	0.362627		39.43	0.575798
	39.47	0.692523		39.47	0.193572		39.47	0.357898		39.47	0.568474
	39.51	0.685742		39.51	0.191621		39.51	0.353182		39.51	0.561116
	39.55	0.67832		39.55	0.189281		39.55	0.348525		39.55	0.554091
	39.59	0.670177		39.59	0.186977		39.59	0.343969		39.59	0.547234
	39.63	0.662471		39.63	0.184926		39.63	0.339619		39.63	0.540461
	39.67	0.654619		39.67	0.182508		39.67	0.335733		39.67	0.533512
	39.71	0.646786		39.71	0.180153		39.71	0.331502		39.71	0.527343
	39.75	0.639099		39.75	0.178315		39.75	0.327007		39.75	0.521527
	39.78	0.631572		39.78	0.176588		39.78	0.322614		39.78	0.515569
	39.83	0.623692		39.83	0.174727		39.83	0.319004		39.83	0.509125
	39.86	0.615258		39.86	0.172776		39.86	0.315342		39.86	0.503573
	39.9	0.606961		39.9	0.170852		39.9	0.311571		39.9	0.497637
	39.94	0.598959		39.94	0.168945		39.94	0.307807		39.94	0.491868
	39.98	0.591311		39.98	0.167043		39.98	0.304294		39.98	0.48625
	40.02	0.583952		40.02	0.165566		40.02	0.299998		40.02	0.480504
	40.06	0.576473		40.06	0.164186		40.06	0.296468		40.06	0.474845
	40.1	0.568801		40.1	0.161996		40.1	0.292373		40.1	0.469122
	40.14	0.560963		40.14	0.160013		40.14	0.288848		40.14	0.463919
	40.18	0.553617		40.18	0.158453		40.18	0.28568		40.18	0.458594
	40.21	0.546363		40.21	0.156752		40.21	0.282776		40.21	0.453377
	40.26	0.539017		40.26	0.154911		40.26	0.279487		40.26	0.448408
	40.3	0.532526		40.3	0.153345		40.3	0.276091		40.3	0.443835
	40.34	0.525543		40.34	0.151988		40.34	0.272868		40.34	0.439385
	40.37	0.518987		40.37	0.150359		40.37	0.269877		40.37	0.434438
	40.41	0.512781		40.41	0.148729		40.41	0.266826		40.41	0.43009
	40.45	0.506235		40.45	0.147247		40.45	0.263907		40.45	0.426055
	40.49	0.49953		40.49	0.145713		40.49	0.261151		40.49	0.421976
	40.53	0.493462		40.53	0.143913		40.53	0.258058		40.53	0.417788
	40.57	0.487812		40.57	0.143046		40.57	0.255534		40.57	0.41394
	40.61	0.481363		40.61	0.141697		40.61	0.253221		40.61	0.410027
	40.65	0.475376		40.65	0.139803		40.65	0.250876		40.65	0.406236
	40.69	0.469955		40.69	0.138388		40.69	0.248194		40.69	0.402394
	40.72	0.464338		40.72	0.137064		40.72	0.245344		40.72	0.398189
	40.77	0.459153		40.77	0.135835		40.77	0.243052		40.77	0.394464
	40.8	0.453339		40.8	0.134331		40.8	0.241072		40.8	0.390926
	40.84	0.448205		40.84	0.132888		40.84	0.238633		40.84	0.387427
	40.88	0.44375		40.88	0.131897		40.88	0.236325		40.88	0.383589
	40.92	0.438022		40.92	0.131138		40.92	0.234172		40.92	0.380131
	40.96	0.43301		40.96	0.130256		40.96	0.232383		40.96	0.376397
	41	0.427829		41	0.129039		41	0.230658		41	0.372902
	41.04	0.422858		41.04	0.127643		41.04	0.229004		41.04	0.369496
	41.08	0.418363		41.08	0.126799		41.08	0.227262		41.08	0.366555
	41.12	0.413271		41.12	0.126213		41.12	0.22547		41.12	0.36308
	41.16	0.408819		41.16	0.125567		41.16	0.223922		41.16	0.359889
	41.19	0.404862		41.19	0.124443		41.19	0.222593		41.19	0.357243
	41.24	0.400506		41.24	0.123354		41.24	0.221196		41.24	0.354884
	41.28	0.39637		41.28	0.122578		41.28	0.220234		41.28	0.351991
	41.31	0.392255		41.31	0.121801		41.31	0.219382		41.31	0.349044
	41.35	0.387773		41.35	0.12118		41.35	0.218277		41.35	0.346193
	41.39	0.3837		41.39	0.12068		41.39	0.216974		41.39	0.343801
	41.43	0.379759		41.43	0.119953		41.43	0.215875		41.43	0.341802
	41.47	0.375576		41.47	0.119279		41.47	0.21487		41.47	0.339402
	41.51	0.371731		41.51	0.118811		41.51	0.214165		41.51	0.336855
	41.55	0.368091		41.55	0.118258		41.55	0.213901		41.55	0.335422
	41.59	0.364335		41.59	0.117874		41.59	0.21358		41.59	0.334065
	41.63	0.361078		41.63	0.117563		41.63	0.213166		41.63	0.332032
	41.67	0.357578		41.67	0.117247		41.67	0.212808		41.67	0.330299
	41.7	0.354155		41.7	0.117105		41.7	0.212577		41.7	0.328937
	41.75	0.35038		41.75	0.117049		41.75	0.212517		41.75	0.327749
	41.78	0.346812		41.78	0.117031		41.78	0.212706		41.78	0.326353
	41.82	0.343426		41.82	0.117197		41.82	0.212976		41.82	0.325145
	41.86	0.339843		41.86	0.11733		41.86	0.213334		41.86	0.323958
	41.9	0.336221		41.9	0.117597		41.9	0.213845		41.9	0.322482
	41.94	0.333282		41.94	0.117653		41.94	0.214775		41.94	0.322222
	41.98	0.330708		41.98	0.117861		41.98	0.216075		41.98	0.322587
	42.02	0.327923		42.02	0.118218		42.02	0.217125		42.02	0.322182
	42.06	0.324394		42.06	0.118509		42.06	0.218762		42.06	0.321317
	42.1	0.321161		42.1	0.118967		42.1	0.220513		42.1	0.320963
	42.13	0.318217		42.13	0.119535		42.13	0.22217		42.13	0.321013
	42.17	0.315461		42.17	0.12037		42.17	0.224229		42.17	0.321391
	42.22	0.312476		42.22	0.121309		42.22	0.226533		42.22	0.322058
	42.25	0.310034		42.25	0.122061		42.25	0.22958		42.25	0.322582
	42.29	0.307536		42.29	0.122886		42.29	0.232947		42.29	0.323477
	42.33	0.304615		42.33	0.124057		42.33	0.236939		42.33	0.326404
	42.37	0.302345		42.37	0.125622		42.37	0.240168		42.37	0.328865
	42.41	0.300181		42.41	0.127039		42.41	0.244375		42.41	0.331295
	42.45	0.296992		42.45	0.128947		42.45	0.248975		42.45	0.334071
	42.49	0.294655		42.49	0.130705		42.49	0.253648		42.49	0.337326
	42.53	0.292651		42.53	0.132685		42.53	0.258968		42.53	0.34095
	42.57	0.290525		42.57	0.134802		42.57	0.265008		42.57	0.345063
	42.61	0.288178		42.61	0.137111		42.61	0.271341		42.61	0.349283
	42.65	0.286198		42.65	0.139698		42.65	0.277943		42.65	0.35417
	42.69	0.284236		42.69	0.142363		42.69	0.284716		42.69	0.359407
	42.73	0.282069		42.73	0.145588		42.73	0.292138		42.73	0.365032
	42.77	0.280014		42.77	0.148517		42.77	0.299908		42.77	0.370803
	42.8	0.278379		42.8	0.152038		42.8	0.307978		42.8	0.377034
	42.84	0.276835		42.84	0.155758		42.84	0.317322		42.84	0.383365
	42.89	0.274915		42.89	0.159547		42.89	0.32692		42.89	0.390504
	42.92	0.273329		42.92	0.163923		42.92	0.336865		42.92	0.398653
	42.96	0.271935		42.96	0.16874		42.96	0.346727		42.96	0.407093
	43	0.270376		43	0.173586		43	0.357074		43	0.415834
	43.04	0.2686		43.04	0.178577		43.04	0.367856		43.04	0.424795
	43.08	0.267023		43.08	0.183358		43.08	0.379314		43.08	0.434014
	43.12	0.265898		43.12	0.188686		43.12	0.391216		43.12	0.444148
	43.16	0.264831		43.16	0.194433		43.16	0.403006		43.16	0.453952
	43.2	0.263612		43.2	0.200659		43.2	0.414918		43.2	0.464338
	43.24	0.262691		43.24	0.207137		43.24	0.426831		43.24	0.475634
	43.27	0.261778		43.27	0.21393		43.27	0.438776		43.27	0.487664
	43.31	0.261043		43.31	0.22104		43.31	0.450943		43.31	0.498818
	43.35	0.260056		43.35	0.228578		43.35	0.463848		43.35	0.510053
	43.39	0.259437		43.39	0.235306		43.39	0.476706		43.39	0.52183
	43.43	0.258775		43.43	0.242369		43.43	0.489451		43.43	0.534109
	43.47	0.258574		43.47	0.249842		43.47	0.502466		43.47	0.546754
	43.51	0.258497		43.51	0.257493		43.51	0.51491		43.51	0.559046
	43.55	0.258639		43.55	0.265585		43.55	0.52722		43.55	0.571638
	43.59	0.258403		43.59	0.273933		43.59	0.538956		43.59	0.584383
	43.63	0.258215		43.63	0.281537		43.63	0.550437		43.63	0.597482
	43.67	0.258427		43.67	0.288601		43.67	0.562587		43.67	0.609611
	43.71	0.259214		43.71	0.296285		43.71	0.57471		43.71	0.621699
	43.75	0.259109		43.75	0.304261		43.75	0.586027		43.75	0.633773
	43.79	0.259544		43.79	0.311251		43.79	0.596391		43.79	0.64663
	43.82	0.260133		43.82	0.318166		43.82	0.605812		43.82	0.659166
	43.86	0.261194		43.86	0.325366		43.86	0.615358		43.86	0.670986
	43.9	0.26249		43.9	0.33248		43.9	0.624253		43.9	0.68254
	43.94	0.263457		43.94	0.339116		43.94	0.632742		43.94	0.693615
	43.98	0.265364		43.98	0.345393		43.98	0.640513		43.98	0.705685
	44.02	0.26735		44.02	0.351268		44.02	0.647358		44.02	0.717157
	44.06	0.269326		44.06	0.356772		44.06	0.653904		44.06	0.726692
	44.1	0.271916		44.1	0.362504		44.1	0.660253		44.1	0.73645
	44.14	0.274468		44.14	0.367924		44.14	0.664849		44.14	0.746346
	44.17	0.277509		44.17	0.372436		44.17	0.669111		44.17	0.756519
	44.22	0.280718		44.22	0.375726		44.22	0.672464		44.22	0.765177
	44.25	0.284284		44.25	0.378988		44.25	0.675196		44.25	0.772211
	44.3	0.288559		44.3	0.382131		44.3	0.677578		44.3	0.779142
	44.33	0.293183		44.33	0.384954		44.33	0.679172		44.33	0.786205
	44.37	0.29804		44.37	0.387875		44.37	0.679524		44.37	0.791345
	44.41	0.303219		44.41	0.390216		44.41	0.678944		44.41	0.795724
	44.45	0.308719		44.45	0.392024		44.45	0.677778		44.45	0.800304
	44.49	0.314771		44.49	0.393286		44.49	0.67659		44.49	0.804594
	44.53	0.321764		44.53	0.394078		44.53	0.675048		44.53	0.807611
	44.57	0.328816		44.57	0.393898		44.57	0.672464		44.57	0.810196
	44.61	0.336399		44.61	0.393206		44.61	0.669106		44.61	0.812298
	44.65	0.344375		44.65	0.392252		44.65	0.664974		44.65	0.814047
	44.69	0.353073		44.69	0.3914		44.69	0.661036		44.69	0.815471
	44.72	0.362844		44.72	0.389912		44.72	0.656658		44.72	0.816649
	44.76	0.372627		44.76	0.388116		44.76	0.651243		44.76	0.816591
	44.8	0.382337		44.8	0.386002		44.8	0.645128		44.8	0.814367
	44.84	0.393203		44.84	0.383441		44.84	0.638959		44.84	0.812107
	44.88	0.404466		44.88	0.380347		44.88	0.633319		44.88	0.810283
	44.92	0.415872		44.92	0.377403		44.92	0.626837		44.92	0.808186
	44.96	0.427615		44.96	0.37423		44.96	0.619591		44.96	0.805743
	45	0.439479		45	0.370671		45	0.612432		45	0.802205
	45.04	0.451736		45.04	0.367008		45.04	0.605408		45.04	0.798341
	45.08	0.464481		45.08	0.362967		45.08	0.598121		45.08	0.794618
	45.11	0.476888		45.11	0.359022		45.11	0.590112		45.11	0.79057
	45.15	0.488981		45.15	0.354867		45.15	0.582256		45.15	0.785643
	45.2	0.501442		45.2	0.350434		45.2	0.574677		45.2	0.779728
	45.23	0.513939		45.23	0.34622		45.23	0.566911		45.23	0.773838
	45.27	0.525992		45.27	0.341993		45.27	0.559503		45.27	0.768004
	45.31	0.538211		45.31	0.337462		45.31	0.55155		45.31	0.761719
	45.35	0.550582		45.35	0.3331		45.35	0.543522		45.35	0.754887
	45.39	0.562777		45.39	0.328648		45.39	0.535443		45.39	0.748071
	45.43	0.574032		45.43	0.324244		45.43	0.527238		45.43	0.741049
	45.47	0.584975		45.47	0.319752		45.47	0.519538		45.47	0.733805
	45.51	0.595773		45.51	0.315491		45.51	0.51199		45.51	0.726883
	45.55	0.606117		45.55	0.311467		45.55	0.504434		45.55	0.719719
	45.58	0.616088		45.58	0.307012		45.58	0.496596		45.58	0.711954
	45.63	0.625383		45.63	0.302459		45.63	0.489231		45.63	0.704262
	45.67	0.633894		45.67	0.298202		45.67	0.482133		45.67	0.697021
	45.7	0.641973		45.7	0.294548		45.7	0.475232		45.7	0.689461
	45.74	0.649532		45.74	0.290463		45.74	0.467797		45.74	0.6814
	45.78	0.656166		45.78	0.286279		45.78	0.460962		45.78	0.673778
	45.82	0.664496		45.82	0.282318		45.82	0.45451		45.82	0.665914
	45.88	0.669328		45.88	0.278707		45.88	0.448313		45.88	0.65853
	45.92	0.673938		45.92	0.274941		45.92	0.441618		45.92	0.650179
	45.96	0.677441		45.96	0.271491		45.96	0.435471		45.96	0.641878
	46	0.680566		46	0.267791		46	0.429593		46	0.634331
	46.04	0.682538		46.04	0.264286		46.04	0.424254		46.04	0.627351
	46.08	0.683436		46.08	0.26079		46.08	0.418785		46.08	0.620043
	46.12	0.68405		46.12	0.257573		46.12	0.413212		46.12	0.61266
	46.16	0.684343		46.16	0.254289		46.16	0.407971		46.16	0.605566
	46.2	0.683535		46.2	0.251023		46.2	0.402737		46.2	0.598515
	46.24	0.682615		46.24	0.247917		46.24	0.398011		46.24	0.5912
	46.28	0.68104		46.28	0.245214		46.28	0.393682		46.28	0.584279
	46.31	0.678639		46.31	0.243201		46.31	0.388985		46.31	0.577856
	46.35	0.675682		46.35	0.240264		46.35	0.384264		46.35	0.571615
	46.39	0.67266		46.39	0.237217		46.39	0.379902		46.39	0.564722
	46.43	0.668336		46.43	0.234494		46.43	0.37577		46.43	0.557955
	46.47	0.664226		46.47	0.231842		46.47	0.371518		46.47	0.551709
	46.51	0.659578		46.51	0.229401		46.51	0.367088		46.51	0.546027
	46.55	0.654878		46.55	0.226922		46.55	0.363341		46.55	0.53969
	46.59	0.650198		46.59	0.224416		46.59	0.35915		46.59	0.533741
	46.63	0.643542		46.63	0.222053		46.63	0.355621		46.63	0.52792
	46.66	0.637207		46.66	0.220395		46.66	0.352473		46.66	0.521687
	46.71	0.63103		46.71	0.218363		46.71	0.348939		46.71	0.516127
	46.74	0.624848		46.74	0.215951		46.74	0.345209		46.74	0.511061
	46.78	0.618447		46.78	0.213716		46.78	0.342001		46.78	0.505754
	46.82	0.610967		46.82	0.211604		46.82	0.339418		46.82	0.500286
	46.86	0.604471		46.86	0.209497		46.86	0.336266		46.86	0.494884
	46.9	0.597682		46.9	0.207619		46.9	0.333122		46.9	0.490456
	46.94	0.590841		46.94	0.205702		46.94	0.329766		46.94	0.486811
	46.98	0.583048		46.98	0.203731		46.98	0.327104		46.98	0.481451
	47.02	0.575426		47.02	0.201811		47.02	0.324757		47.02	0.475641
	47.06	0.568571		47.06	0.200454		47.06	0.322289		47.06	0.471187
	47.1	0.561567		47.1	0.199103		47.1	0.31936		47.1	0.466986
	47.14	0.554256		47.14	0.19721		47.14	0.316132		47.14	0.462769
	47.17	0.547104		47.17	0.19522		47.17	0.313977		47.17	0.45807
	47.21	0.540219		47.21	0.193646		47.21	0.31272		47.21	0.453651
	47.25	0.532951		47.25	0.192031		47.25	0.310992		47.25	0.4504
	47.29	0.526167		47.29	0.190469		47.29	0.308867		47.29	0.447163
	47.33	0.520201		47.33	0.18912		47.33	0.306716		47.33	0.443679
	47.37	0.513078		47.37	0.187791		47.37	0.304764		47.37	0.440078
	47.41	0.505905		47.41	0.186319		47.41	0.303024		47.41	0.436899
	47.45	0.499234		47.45	0.185003		47.45	0.30151		47.45	0.433724
	47.49	0.492884		47.49	0.183888		47.49	0.29972		47.49	0.430431
	47.53	0.486431		47.53	0.182957		47.53	0.29834		47.53	0.427365
	47.57	0.480242		47.57	0.181748		47.57	0.297214		47.57	0.423911
	47.6	0.474425		47.6	0.180619		47.6	0.296767		47.6	0.420375
	47.65	0.468882		47.65	0.179677		47.65	0.295926		47.65	0.418288
	47.69	0.462866		47.69	0.178733		47.69	0.294806		47.69	0.417455
	47.73	0.457392		47.73	0.177782		47.73	0.293994		47.73	0.41493
	47.76	0.451616		47.76	0.177113		47.76	0.293399		47.76	0.412313
	47.8	0.445664		47.8	0.176059		47.8	0.292793		47.8	0.409883
	47.84	0.440617		47.84	0.175264		47.84	0.292418		47.84	0.40811
	47.88	0.435869		47.88	0.174688		47.88	0.292189		47.88	0.406405
	47.92	0.431148		47.92	0.174036		47.92	0.292198		47.92	0.404582
	47.96	0.426525		47.96	0.173436		47.96	0.29221		47.96	0.402985
	48	0.421922		48	0.173		48	0.292553		48	0.401878
	48.04	0.417553		48.04	0.172657		48.04	0.292909		48.04	0.400785
	48.08	0.412841		48.08	0.172329		48.08	0.293541		48.08	0.400635
	48.12	0.408665		48.12	0.172103		48.12	0.294336		48.12	0.399675
	48.15	0.404364		48.15	0.171811		48.15	0.295172		48.15	0.399073
	48.19	0.399907		48.19	0.171706		48.19	0.29608		48.19	0.398852
	48.24	0.395913		48.24	0.171615		48.24	0.297397		48.24	0.399132
	48.27	0.392143		48.27	0.17173		48.27	0.298984		48.27	0.399439
	48.31	0.388768		48.31	0.171997		48.31	0.300525		48.31	0.399544
	48.35	0.384847		48.35	0.172162		48.35	0.302327		48.35	0.40048
	48.39	0.381094		48.39	0.172424		48.39	0.304276		48.39	0.401095
	48.43	0.377417		48.43	0.173038		48.43	0.306873		48.43	0.401828
	48.47	0.373918		48.47	0.173414		48.47	0.309496		48.47	0.403248
	48.51	0.37064		48.51	0.173921		48.51	0.312241		48.51	0.404572
	48.55	0.367493		48.55	0.174608		48.55	0.314993		48.55	0.405801
	48.59	0.364677		48.59	0.17552		48.59	0.317786		48.59	0.407443
	48.62	0.36162		48.62	0.176381		48.62	0.320986		48.62	0.409627
	48.67	0.358704		48.67	0.177418		48.67	0.32471		48.67	0.411918
	48.7	0.356428		48.7	0.178464		48.7	0.328894		48.7	0.414231
	48.74	0.352485		48.74	0.179398		48.74	0.333034		48.74	0.416917
	48.78	0.349992		48.78	0.18093		48.78	0.337362		48.78	0.420139
	48.82	0.347576		48.82	0.182491		48.82	0.341769		48.82	0.423553
	48.86	0.345256		48.86	0.184234		48.86	0.346274		48.86	0.42709
	48.9	0.342707		48.9	0.18603		48.9	0.351221		48.9	0.430816
	48.94	0.340409		48.94	0.18781		48.94	0.356302		48.94	0.434821
	48.98	0.338065		48.98	0.18984		48.98	0.361695		48.98	0.439494
	49.01	0.335608		49.01	0.192221		49.01	0.367519		49.01	0.444177
	49.05	0.333341		49.05	0.194766		49.05	0.37349		49.05	0.449066
	49.1	0.33161		49.1	0.197212		49.1	0.379205		49.1	0.454149
	49.13	0.329687		49.13	0.1999		49.13	0.385258		49.13	0.459647
	49.17	0.327985		49.17	0.202758		49.17	0.39248		49.17	0.46564
	49.21	0.325771		49.21	0.205788		49.21	0.399203		49.21	0.471925
	49.26	0.323809		49.26	0.210734		49.26	0.406022		49.26	0.477767
	49.29	0.322729		49.29	0.214237		49.29	0.412342		49.29	0.483901
	49.33	0.321171		49.33	0.217155		49.33	0.418901		49.33	0.489983
	49.37	0.319578		49.37	0.22071		49.37	0.425808		49.37	0.496243
	49.41	0.31809		49.41	0.224427		49.41	0.43272		49.41	0.502769
	49.45	0.316478		49.45	0.227948		49.45	0.439843		49.45	0.509366
	49.49	0.315101		49.49	0.23146		49.49	0.446164		49.49	0.516017
	49.53	0.313905		49.53	0.235188		49.53	0.453209		49.53	0.522887
	49.57	0.312874		49.57	0.23915		49.57	0.460047		49.57	0.529611
	49.61	0.311994		49.61	0.243272		49.61	0.466807		49.61	0.536617
	49.65	0.310902		49.65	0.247193		49.65	0.473455		49.65	0.543895
	49.68	0.310319		49.68	0.251014		49.68	0.478997		49.68	0.550961
	49.73	0.310005		49.73	0.254962		49.73	0.484782		49.73	0.558126
	49.76	0.309174		49.76	0.258827		49.76	0.491112		49.76	0.564895
	49.8	0.308666		49.8	0.263289		49.8	0.496892		49.8	0.571606
	49.84	0.30796		49.84	0.267473		49.84	0.502649		49.84	0.578133
	49.88	0.30765		49.88	0.270868		49.88	0.507471		49.88	0.584911
	49.92	0.307543		49.92	0.274042		49.92	0.512014		49.92	0.590933
	49.96	0.307622		49.96	0.277968		49.96	0.516936		49.96	0.59665
	50	0.307716		50	0.281626		50	0.521599		50	0.602647
	50.04	0.307835		50.04	0.28535		50.04	0.525091		50.04	0.608587
	50.08	0.308202		50.08	0.288479		50.08	0.528163		50.08	0.613962
	50.12	0.308859		50.12	0.291389		50.12	0.531584		50.12	0.618857
	50.15	0.309482		50.15	0.294411		50.15	0.534295		50.15	0.623344
	50.19	0.309962		50.19	0.297043		50.19	0.536593		50.19	0.628618
	50.23	0.310825		50.23	0.299938		50.23	0.538378		50.23	0.633005
	50.27	0.312009		50.27	0.302346		50.27	0.539948		50.27	0.636676
	50.31	0.313364		50.31	0.304223		50.31	0.540925		50.31	0.640257
	50.35	0.314943		50.35	0.306361		50.35	0.542023		50.35	0.643642
	50.39	0.316673		50.39	0.30833		50.39	0.542748		50.39	0.646843
	50.43	0.318709		50.43	0.30995		50.43	0.542745		50.43	0.650333
	50.47	0.3209		50.47	0.310976		50.47	0.541696		50.47	0.653068
	50.51	0.323512		50.51	0.312002		50.51	0.540688		50.51	0.655002
	50.55	0.32591		50.55	0.312695		50.55	0.539674		50.55	0.655544
	50.59	0.328329		50.59	0.313203		50.59	0.538417		50.59	0.656937
	50.63	0.33135		50.63	0.313463		50.63	0.537033		50.63	0.657764
	50.66	0.334788		50.66	0.313646		50.66	0.534818		50.66	0.658296
	50.7	0.338283		50.7	0.313539		50.7	0.532291		50.7	0.658354
	50.74	0.341852		50.74	0.312903		50.74	0.529285		50.74	0.658415
	50.78	0.3456		50.78	0.312153		50.78	0.526073		50.78	0.658272
	50.82	0.349728		50.82	0.311236		50.82	0.52236		50.82	0.657375
	50.86	0.35356		50.86	0.310261		50.86	0.518501		50.86	0.655973
	50.9	0.358164		50.9	0.308946		50.9	0.514594		50.9	0.654288
	50.94	0.363145		50.94	0.307479		50.94	0.510779		50.94	0.652178
	50.98	0.368188		50.98	0.305716		50.98	0.506828		50.98	0.650171
	51.02	0.372992		51.02	0.303993		51.02	0.502406		51.02	0.64806
	51.06	0.37831		51.06	0.302194		51.06	0.497772		51.06	0.645289
	51.1	0.383833		51.1	0.300219		51.1	0.492714		51.1	0.642192
	51.14	0.389374		51.14	0.297937		51.14	0.487684		51.14	0.639096
	51.17	0.394677		51.17	0.29573		51.17	0.482542		51.17	0.635792
	51.21	0.400388		51.21	0.293431		51.21	0.477423		51.21	0.632111
	51.25	0.406832		51.25	0.290919		51.25	0.472638		51.25	0.628412
	51.29	0.412608		51.29	0.288243		51.29	0.467468		51.29	0.624196
	51.33	0.418624		51.33	0.285442		51.33	0.462053		51.33	0.620008
	51.37	0.424649		51.37	0.28275		51.37	0.45671		51.37	0.615932
	51.41	0.430297		51.41	0.280041		51.41	0.451386		51.41	0.611588
	51.45	0.43596		51.45	0.277198		51.45	0.446312		51.45	0.607005
	51.49	0.441591		51.49	0.273924		51.49	0.440864		51.49	0.602515
	51.52	0.44743		51.52	0.270771		51.52	0.43528		51.52	0.598006
	51.57	0.453061		51.57	0.267947		51.57	0.430099		51.57	0.593141
	51.6	0.458473		51.6	0.265151		51.6	0.42526		51.6	0.587754
	51.65	0.463626		51.65	0.262182		51.65	0.420237		51.65	0.582416
	51.68	0.468471		51.68	0.259274		51.68	0.415821		51.68	0.577391
	51.72	0.473463		51.72	0.256168		51.72	0.410837		51.72	0.5729
	51.76	0.47816		51.76	0.253045		51.76	0.406304		51.76	0.568257
	51.8	0.4823		51.8	0.250363		51.8	0.402111		51.8	0.563139
	51.84	0.48643		51.84	0.247644		51.84	0.397687		51.84	0.558355
	51.88	0.490595		51.88	0.244415		51.88	0.392882		51.88	0.553701
	51.92	0.494148		51.92	0.241278		51.92	0.388051		51.92	0.548742
	51.96	0.496952		51.96	0.238513		51.96	0.384129		51.96	0.543099
	52	0.499578		52	0.236337		52	0.379894		52	0.53809
	52.04	0.502279		52.04	0.233555		52.04	0.375657		52.04	0.533743
	52.07	0.504925		52.07	0.230684		52.07	0.371301		52.07	0.529216
	52.11	0.506891		52.11	0.227985		52.11	0.36803		52.11	0.523843
	52.15	0.507943		52.15	0.225284		52.15	0.364575		52.15	0.518512
	52.19	0.508846		52.19	0.222674		52.19	0.361142		52.19	0.513701
	52.23	0.509926		52.23	0.220017		52.23	0.357961		52.23	0.509519
	52.27	0.510699		52.27	0.217621		52.27	0.35482		52.27	0.505167
	52.31	0.510969		52.31	0.215387		52.31	0.351456		52.31	0.501326
	52.35	0.51067		52.35	0.2133		52.35	0.348561		52.35	0.497446
	52.39	0.509916		52.39	0.211269		52.39	0.346104		52.39	0.492931
	52.43	0.509093		52.43	0.209008		52.43	0.343252		52.43	0.488997
	52.47	0.508079		52.47	0.206762		52.47	0.340582		52.47	0.485204
	52.5	0.506797		52.5	0.204847		52.5	0.338198		52.5	0.481309
	52.55	0.504534		52.55	0.202827		52.55	0.336667		52.55	0.476747
	52.59	0.502262		52.59	0.200957		52.59	0.333195		52.59	0.472679
	52.63	0.500653		52.63	0.1991		52.63	0.331042		52.63	0.470105
	52.67	0.498264		52.67	0.197201		52.67	0.328409		52.67	0.467046
	52.71	0.495303		52.71	0.195729		52.71	0.326246		52.71	0.462938
	52.74	0.492133		52.74	0.194352		52.74	0.324508		52.74	0.459606
	52.78	0.48901		52.78	0.192831		52.78	0.322808		52.78	0.455956
	52.82	0.48563		52.82	0.191338		52.82	0.321486		52.82	0.452939
	52.86	0.482037		52.86	0.18992		52.86	0.320202		52.86	0.450247
	52.9	0.4785		52.9	0.188611		52.9	0.319165		52.9	0.447094
	52.94	0.474183		52.94	0.187352		52.94	0.318092		52.94	0.444266
	52.98	0.469986		52.98	0.186077		52.98	0.317257		52.98	0.442528
	53.02	0.466184		53.02	0.184977		53.02	0.316319		53.02	0.440887
	53.06	0.462524		53.06	0.183987		53.06	0.31587		53.06	0.438538
	53.09	0.457773		53.09	0.182898		53.09	0.315212		53.09	0.436338
	53.14	0.453143		53.14	0.181958		53.14	0.314768		53.14	0.434729
	53.17	0.448582		53.17	0.181052		53.17	0.314499		53.17	0.433274
	53.21	0.444158		53.21	0.18056		53.21	0.314315		53.21	0.431421
	53.25	0.43984		53.25	0.179934		53.25	0.314892		53.25	0.43
	53.29	0.435361		53.29	0.179416		53.29	0.314739		53.29	0.428486
	53.33	0.430931		53.33	0.178302		53.33	0.315017		53.33	0.427298
	53.37	0.426333		53.37	0.177839		53.37	0.315185		53.37	0.426634
	53.41	0.421975		53.41	0.177468		53.41	0.315661		53.41	0.426543
	53.45	0.417691		53.45	0.177277		53.45	0.316132		53.45	0.425571
	53.49	0.412725		53.49	0.176996		53.49	0.316937		53.49	0.424801
	53.53	0.408367		53.53	0.176646		53.53	0.31762		53.53	0.424007
	53.57	0.404091		53.57	0.176386		53.57	0.318218		53.57	0.423934
	53.61	0.400055		53.61	0.176347		53.61	0.319334		53.61	0.423889
	53.65	0.395784		53.65	0.176103		53.65	0.32052		53.65	0.423446
	53.68	0.391569		53.68	0.175987		53.68	0.322053		53.68	0.423343
	53.73	0.387224		53.73	0.176067		53.73	0.323635		53.73	0.42368
	53.76	0.382993		53.76	0.176193		53.76	0.325223		53.76	0.424516
	53.8	0.379198		53.8	0.176722		53.8	0.327071		53.8	0.425395
	53.84	0.375863		53.84	0.176968		53.84	0.32877		53.84	0.425966
	53.88	0.372385		53.88	0.177377		53.88	0.330871		53.88	0.426913
	53.92	0.3678		53.92	0.177711		53.92	0.33309		53.92	0.428079
	53.96	0.363843		53.96	0.178089		53.96	0.335442		53.96	0.429545
	54	0.36035		54	0.178543		54	0.337555		54	0.431009
	54.04	0.357137		54.04	0.179182		54.04	0.340174		54.04	0.432539
	54.08	0.354211		54.08	0.179892		54.08	0.342637		54.08	0.434198
	54.12	0.351735		54.12	0.180721		54.12	0.345115		54.12	0.43565
	54.16	0.349035		54.16	0.181629		54.16	0.347837		54.16	0.437796
	54.19	0.346294		54.19	0.182614		54.19	0.35051		54.19	0.439834
	54.23	0.343707		54.23	0.183316		54.23	0.353354		54.23	0.44189
	54.27	0.341352		54.27	0.184476		54.27	0.356031		54.27	0.444021
	54.31	0.339175		54.31	0.185669		54.31	0.358614		54.31	0.446192
	54.35	0.336923		54.35	0.186976		54.35	0.361512		54.35	0.448857
	54.39	0.334408		54.39	0.187927		54.39	0.364568		54.39	0.45148
	54.43	0.332191		54.43	0.189134		54.43	0.367603		54.43	0.454179
	54.47	0.329795		54.47	0.190709		54.47	0.370466		54.47	0.456773
	54.51	0.327842		54.51	0.191904		54.51	0.373095		54.51	0.459572
	54.55	0.326066		54.55	0.193278		54.55	0.376053		54.55	0.462564
	54.59	0.323946		54.59	0.194785		54.59	0.37868		54.59	0.465266
	54.62	0.321954		54.62	0.19614		54.62	0.381177		54.62	0.467998
	54.67	0.320176		54.67	0.197559		54.67	0.383732		54.67	0.470901
	54.7	0.318548		54.7	0.19907		54.7	0.386411		54.7	0.473579
	54.74	0.316646		54.74	0.200651		54.74	0.38888		54.74	0.47611
	54.78	0.315049		54.78	0.202401		54.78	0.39108		54.78	0.478664
	54.82	0.31374		54.82	0.203877		54.82	0.39359		54.82	0.48143
	54.86	0.312236		54.86	0.205669		54.86	0.395688		54.86	0.484484
	54.9	0.310471		54.9	0.207366		54.9	0.397937		54.9	0.487318
	54.94	0.308966		54.94	0.209112		54.94	0.399694		54.94	0.489308
	54.98	0.307963		54.98	0.210471		54.98	0.401206		54.98	0.492199
	55.02	0.306987		55.02	0.211763		55.02	0.40282		55.02	0.494793
	55.05	0.306231		55.05	0.213023		55.05	0.404077		55.05	0.497385
	55.09	0.305281		55.09	0.214469		55.09	0.405335		55.09	0.498991
	55.13	0.304455		55.13	0.215824		55.13	0.406733		55.13	0.501039
	55.17	0.303694		55.17	0.217078		55.17	0.407085		55.17	0.502906
	55.21	0.303082		55.21	0.218168		55.21	0.407674		55.21	0.504722
	55.25	0.302533		55.25	0.219206		55.25	0.408108		55.25	0.506444
	55.29	0.302158		55.29	0.220184		55.29	0.40847		55.29	0.507868
	55.33	0.301893		55.33	0.221243		55.33	0.408817		55.33	0.509707
	55.37	0.301857		55.37	0.22224		55.37	0.408907		55.37	0.510431
	55.41	0.302189		55.41	0.223041		55.41	0.408471		55.41	0.511622
	55.45	0.30237		55.45	0.223854		55.45	0.408284		55.45	0.512831
	55.49	0.302197		55.49	0.224653		55.49	0.407802		55.49	0.513544
	55.52	0.302424		55.52	0.225465		55.52	0.407172		55.52	0.514083
	55.57	0.30285		55.57	0.225922		55.57	0.405808		55.57	0.514645
	55.6	0.303332		55.6	0.22641		55.6	0.404668		55.6	0.515094
	55.64	0.304025		55.64	0.226668		55.64	0.403252		55.64	0.515139
	55.68	0.304656		55.68	0.226869		55.68	0.401769		55.68	0.514972
	55.72	0.305589		55.72	0.226842		55.72	0.400397		55.72	0.514853
	55.76	0.306633		55.76	0.227809		55.76	0.398666		55.76	0.514568
	55.8	0.30801		55.8	0.226961		55.8	0.396709		55.8	0.513844
	55.84	0.309281		55.84	0.22692		55.84	0.39481		55.84	0.512977
	55.88	0.310634		55.88	0.226714		55.88	0.392493		55.88	0.512139
	55.92	0.311908		55.92	0.226671		55.92	0.390315		55.92	0.511314
	55.96	0.313413		55.96	0.226274		55.96	0.387803		55.96	0.510204
	56	0.315261		56	0.225931		56	0.385441		56	0.508639
	56.04	0.316806		56.04	0.225392		56.04	0.381857		56.04	0.507149
	56.08	0.318674		56.08	0.224863		56.08	0.379142		56.08	0.505645
	56.12	0.32084		56.12	0.224114		56.12	0.376721		56.12	0.503954
	56.16	0.322715		56.16	0.2233		56.16	0.374239		56.16	0.501982
	56.2	0.325066		56.2	0.222437		56.2	0.371297		56.2	0.500504
	56.24	0.327385		56.24	0.221563		56.24	0.368514		56.24	0.49829
	56.27	0.329575		56.27	0.220559		56.27	0.365608		56.27	0.495992
	56.31	0.331926		56.31	0.219451		56.31	0.362728		56.31	0.493712
	56.35	0.334352		56.35	0.218493		56.35	0.359687		56.35	0.49138
	56.39	0.336941		56.39	0.217229		56.39	0.356852		56.39	0.489003
	56.43	0.339248		56.43	0.216175		56.43	0.353986		56.43	0.486433
	56.47	0.341692		56.47	0.214842		56.47	0.351263		56.47	0.483885
	56.51	0.344157		56.51	0.213783		56.51	0.348846		56.51	0.481246
	56.55	0.346812		56.55	0.212433		56.55	0.345946		56.55	0.478379
	56.59	0.348776		56.59	0.211087		56.59	0.343603		56.59	0.475739
	56.62	0.351112		56.62	0.209716		56.62	0.341209		56.62	0.473003
	56.67	0.353395		56.67	0.208482		56.67	0.338475		56.67	0.469951
	56.71	0.355828		56.71	0.207018		56.71	0.336027		56.71	0.467648
	56.74	0.35799		56.74	0.205408		56.74	0.333679		56.74	0.465002
	56.78	0.360321		56.78	0.204135		56.78	0.331224		56.78	0.462351
	56.82	0.362482		56.82	0.202705		56.82	0.328903		56.82	0.459607
	56.86	0.364419		56.86	0.201356		56.86	0.326691		56.86	0.45717
	56.9	0.366219		56.9	0.199807		56.9	0.324444		56.9	0.454441
	56.94	0.367737		56.94	0.19842		56.94	0.322502		56.94	0.451481
	56.98	0.369475		56.98	0.197149		56.98	0.320634		56.98	0.448947
	57.02	0.370935		57.02	0.195909		57.02	0.319094		57.02	0.446337
	57.06	0.372593		57.06	0.194665		57.06	0.317079		57.06	0.443694
	57.09	0.373845		57.09	0.192969		57.09	0.315485		57.09	0.441301
	57.14	0.375226		57.14	0.191648		57.14	0.313859		57.14	0.43913
	57.17	0.376382		57.17	0.190561		57.17	0.312232		57.17	0.437116
	57.21	0.377117		57.21	0.189316		57.21	0.311426		57.21	0.434245
	57.25	0.377868		57.25	0.187995		57.25	0.309746		57.25	0.43206
	57.29	0.378191		57.29	0.186733		57.29	0.308458		57.29	0.430034
	57.33	0.378445		57.33	0.185776		57.33	0.307354		57.33	0.428306
	57.37	0.378755		57.37	0.18448		57.37	0.306424		57.37	0.426415
	57.41	0.379139		57.41	0.183566		57.41	0.3055		57.41	0.424837
	57.45	0.37916		57.45	0.18262		57.45	0.304646		57.45	0.422953
	57.49	0.379028		57.49	0.181337		57.49	0.304293		57.49	0.421267
	57.52	0.378809		57.52	0.180446		57.52	0.303788		57.52	0.419305
	57.56	0.378531		57.56	0.179538		57.56	0.302852		57.56	0.417394
	57.6	0.3778		57.6	0.178422		57.6	0.302322		57.6	0.41608
	57.64	0.377184		57.64	0.177484		57.64	0.301897		57.64	0.415207
	57.68	0.37652		57.68	0.176921		57.68	0.301921		57.68	0.414216
	57.72	0.3753		57.72	0.176493		57.72	0.301697		57.72	0.413203
	57.76	0.374024		57.76	0.17572		57.76	0.301269		57.76	0.412202
	57.8	0.372913		57.8	0.175021		57.8	0.301539		57.8	0.411404
	57.84	0.371493		57.84	0.174476		57.84	0.301631		57.84	0.410896
	57.88	0.370082		57.88	0.174011		57.88	0.301767		57.88	0.410452
	57.92	0.368383		57.92	0.173418		57.92	0.302224		57.92	0.409805
	57.96	0.366978		57.96	0.172774		57.96	0.30259		57.96	0.409265
	58	0.365458		58	0.172154		58	0.303192		58	0.408656
	58.04	0.363409		58.04	0.172171		58.04	0.303492		58.04	0.408228
	58.08	0.361328		58.08	0.172049		58.08	0.304555		58.08	0.408044
	58.11	0.359206		58.11	0.171717		58.11	0.30519		58.11	0.407989
	58.15	0.35706		58.15	0.171279		58.15	0.305926		58.15	0.408131
	58.19	0.355063		58.19	0.17118		58.19	0.306951		58.19	0.408565
	58.23	0.352964		58.23	0.171086		58.23	0.308024		58.23	0.40903
	58.27	0.35091		58.27	0.171167		58.27	0.309264		58.27	0.409311
	58.31	0.348735		58.31	0.171253		58.31	0.309947		58.31	0.409457
	58.35	0.347001		58.35	0.171244		58.35	0.31061		58.35	0.410115
	58.39	0.344687		58.39	0.171174		58.39	0.311559		58.39	0.410503
	58.43	0.342182		58.43	0.171643		58.43	0.312383		58.43	0.411292
	58.47	0.339828		58.47	0.172177		58.47	0.31291		58.47	0.412079
	58.5	0.337578		58.5	0.172353		58.5	0.31434		58.5	0.412836
	58.55	0.335375		58.55	0.172693		58.55	0.315997		58.55	0.413568
	58.58	0.333378		58.58	0.17299		58.58	0.317521		58.58	0.414487
	58.62	0.331267		58.62	0.173517		58.62	0.319065		58.62	0.415288
	58.66	0.32899		58.66	0.174083		58.66	0.320472		58.66	0.416114
	58.7	0.32672		58.7	0.174701		58.7	0.321598		58.7	0.417111
	58.74	0.324789		58.74	0.175331		58.74	0.322827		58.74	0.418248
	58.78	0.322747		58.78	0.175822		58.78	0.324058		58.78	0.4192
	58.82	0.32069		58.82	0.176385		58.82	0.325253		58.82	0.420209
	58.86	0.318329		58.86	0.176964		58.86	0.326566		58.86	0.42101
	58.9	0.316019		58.9	0.17775		58.9	0.328039		58.9	0.422298
	58.94	0.314017		58.94	0.178428		58.94	0.328875		58.94	0.423351
	58.97	0.312121		58.97	0.179255		58.97	0.330022		58.97	0.424583
	59.02	0.310431		59.02	0.179751		59.02	0.331114		59.02	0.42579
	59.05	0.308693		59.05	0.179922		59.05	0.33212		59.05	0.426507
	59.09	0.307049		59.09	0.180456		59.09	0.332905		59.09	0.427534
	59.13	0.305598		59.13	0.181218		59.13	0.333896		59.13	0.428385
	59.17	0.304113		59.17	0.181662		59.17	0.334937		59.17	0.429133
	59.21	0.302293		59.21	0.182442		59.21	0.335777		59.21	0.43003
	59.25	0.300993		59.25	0.183484		59.25	0.336441		59.25	0.430783
	59.29	0.299731		59.29	0.184021		59.29	0.337013		59.29	0.43166
	59.33	0.297648		59.33	0.184932		59.33	0.337701		59.33	0.432286
	59.39	0.296302		59.39	0.185914		59.39	0.337933		59.39	0.433055
	59.43	0.295148		59.43	0.186912		59.43	0.338474		59.43	0.433562
	59.47	0.293817		59.47	0.187532		59.47	0.338535		59.47	0.433896
	59.51	0.292987		59.51	0.188237		59.51	0.338698		59.51	0.434316
	59.55	0.292191		59.55	0.189039		59.55	0.338707		59.55	0.434905
	59.59	0.291174		59.59	0.189752		59.59	0.338603		59.59	0.435124
	59.63	0.290558		59.63	0.190359		59.63	0.338526		59.63	0.435165
	59.67	0.290211		59.67	0.190831		59.67	0.338303		59.67	0.435049
	59.71	0.289483		59.71	0.191293		59.71	0.337833		59.71	0.435179
	59.75	0.288935		59.75	0.19168		59.75	0.337423		59.75	0.434903
	59.78	0.288515		59.78	0.19205		59.78	0.336833		59.78	0.434562
	59.83	0.288388		59.83	0.192023		59.83	0.336345		59.83	0.43432
	59.86	0.288148		59.86	0.192126		59.86	0.335866		59.86	0.433846
	59.91	0.287901		59.91	0.192518		59.91	0.334977		59.91	0.433483
	59.94	0.288083		59.94	0.192836		59.94	0.334195		59.94	0.432907
	59.98	0.288123		59.98	0.192551		59.98	0.333275		59.98	0.432488
	60.02	0.288271		60.02	0.192743		60.02	0.332315		60.02	0.431823
	60.06	0.288133		60.06	0.192582		60.06	0.330967		60.06	0.431059
	60.1	0.288791		60.1	0.19264		60.1	0.329801		60.1	0.429886
	60.14	0.288498		60.14	0.192515		60.14	0.328803		60.14	0.429108
	60.18	0.288827		60.18	0.192592		60.18	0.327457		60.18	0.428324
	60.22	0.289106		60.22	0.192194		60.22	0.326254		60.22	0.427253
	60.26	0.289697		60.26	0.191658		60.26	0.324935		60.26	0.426278
	60.29	0.290158		60.29	0.191437		60.29	0.323657		60.29	0.425288
	60.33	0.29088		60.33	0.191131		60.33	0.322258		60.33	0.423923
	60.38	0.291405		60.38	0.190634		60.38	0.320934		60.38	0.422487
	60.41	0.292158		60.41	0.1899		60.41	0.319693		60.41	0.421127
	60.45	0.293036		60.45	0.189539		60.45	0.31857		60.45	0.419715
	60.49	0.293892		60.49	0.189361		60.49	0.317011		60.49	0.418596
	60.53	0.294745		60.53	0.188892		60.53	0.315849		60.53	0.417126
	60.57	0.295419		60.57	0.188029		60.57	0.31428		60.57	0.415298
	60.61	0.296419		60.61	0.187196		60.61	0.31284		60.61	0.413964
	60.65	0.297448		60.65	0.186431		60.65	0.311583		60.65	0.412498
	60.69	0.29856		60.69	0.185819		60.69	0.310264		60.69	0.411255
	60.73	0.299688		60.73	0.185229		60.73	0.308746		60.73	0.409601
	60.76	0.300746		60.76	0.184233		60.76	0.307279		60.76	0.408455
	60.81	0.30184		60.81	0.183439		60.81	0.306168		60.81	0.40692
	60.84	0.302989		60.84	0.183004		60.84	0.305136		60.84	0.405397
	60.89	0.303821		60.89	0.182144		60.89	0.303835		60.89	0.403505
	60.92	0.304649		60.92	0.181272		60.92	0.302621		60.92	0.401913
	60.96	0.305348		60.96	0.180187		60.96	0.301264		60.96	0.40043
	61	0.306176		61	0.179458		61	0.300142		61	0.399194
	61.04	0.307305		61.04	0.178647		61.04	0.299039		61.04	0.398013
	61.08	0.3082		61.08	0.178036		61.08	0.298017		61.08	0.397102
	61.12	0.308915		61.12	0.17721		61.12	0.296972		61.12	0.395675
	61.16	0.309733		61.16	0.176212		61.16	0.295757		61.16	0.394231
	61.2	0.31063		61.2	0.175445		61.2	0.294764		61.2	0.392663
	61.24	0.311313		61.24	0.17504		61.24	0.293913		61.24	0.391404
	61.27	0.311841		61.27	0.174489		61.27	0.293076		61.27	0.390417
	61.31	0.31222		61.31	0.173681		61.31	0.292296		61.31	0.389226
	61.35	0.312755		61.35	0.17279		61.35	0.291151		61.35	0.387996
	61.39	0.313499		61.39	0.171978		61.39	0.290927		61.39	0.386937
	61.43	0.313662		61.43	0.171251		61.43	0.290111		61.43	0.38607
	61.47	0.313916		61.47	0.170682		61.47	0.289695		61.47	0.385016
	61.51	0.314048		61.51	0.170124		61.51	0.289151		61.51	0.384095
	61.55	0.314048		61.55	0.169407		61.55	0.288238		61.55	0.38331
	61.59	0.314207		61.59	0.168715		61.59	0.287917		61.59	0.38273
	61.63	0.314184		61.63	0.168335		61.63	0.287835		61.63	0.382007
	61.67	0.313875		61.67	0.167848		61.67	0.287924		61.67	0.381136
	61.71	0.313481		61.71	0.167144		61.71	0.287403		61.71	0.38054
	61.74	0.313116		61.74	0.166569		61.74	0.287433		61.74	0.379916
	61.79	0.312837		61.79	0.166476		61.79	0.287716		61.79	0.379445
	61.82	0.312484		61.82	0.166234		61.82	0.288086		61.82	0.379299
	61.86	0.311765		61.86	0.165863		61.86	0.28784		61.86	0.37935
	61.9	0.311433		61.9	0.165521		61.9	0.28775		61.9	0.378887
	61.94	0.310768		61.94	0.165257		61.94	0.288098		61.94	0.378247
	61.98	0.310152		61.98	0.165079		61.98	0.288236		61.98	0.378064
	62.02	0.309257		62.02	0.165057		62.02	0.288509		62.02	0.377923
	62.06	0.308307		62.06	0.164972		62.06	0.288946		62.06	0.377735
	62.1	0.307214		62.1	0.164658		62.1	0.289247		62.1	0.377968
	62.14	0.306493		62.14	0.164438		62.14	0.289636		62.14	0.378057
	62.18	0.305732		62.18	0.16462		62.18	0.290225		62.18	0.378075
	62.21	0.304671		62.21	0.164898		62.21	0.290671		62.21	0.378452
	62.25	0.303409		62.25	0.164829		62.25	0.291151		62.25	0.378277
	62.29	0.302203		62.29	0.164661		62.29	0.291452		62.29	0.378173
	62.33	0.30079		62.33	0.16451		62.33	0.292322		62.33	0.37827
	62.37	0.299608		62.37	0.164703		62.37	0.29248		62.37	0.378531
	62.41	0.29827		62.41	0.165153		62.41	0.29286		62.41	0.37899
	62.45	0.296978		62.45	0.1652		62.45	0.293361		62.45	0.37937
	62.49	0.295733		62.49	0.165109		62.49	0.294075		62.49	0.37938
	62.53	0.294499		62.53	0.165443		62.53	0.294404		62.53	0.379599
	62.57	0.293155		62.57	0.16567		62.57	0.294761		62.57	0.379702
	62.61	0.291971		62.61	0.165578		62.61	0.295344		62.61	0.379836
	62.65	0.290703		62.65	0.165652		62.65	0.295678		62.65	0.380088
	62.69	0.289284		62.69	0.165746		62.69	0.296108		62.69	0.380121
	62.72	0.288091		62.72	0.166463		62.72	0.296605		62.72	0.380137
	62.77	0.28719		62.77	0.166382		62.77	0.297112		62.77	0.380482
	62.8	0.284979		62.8	0.166561		62.8	0.296996		62.8	0.380741
	62.87	0.283589		62.87	0.166777		62.87	0.297537		62.87	0.380821
	62.91	0.282223		62.91	0.167307		62.91	0.297816		62.91	0.38066
	62.95	0.281762		62.95	0.167696		62.95	0.297619		62.95	0.380625
	62.99	0.280299		62.99	0.167643		62.99	0.297784		62.99	0.381167
	63.03	0.278374		63.03	0.16751		63.03	0.297537		63.03	0.38104
	63.07	0.277322		63.07	0.167519		63.07	0.297405		63.07	0.380963
	63.11	0.276363		63.11	0.167926		63.11	0.297243		63.11	0.380711
	63.15	0.275161		63.15	0.168299		63.15	0.297107		63.15	0.380648
	63.18	0.274199		63.18	0.167643		63.18	0.297184		63.18	0.380442
	63.22	0.273316		63.22	0.16763		63.22	0.296845		63.22	0.379625
	63.26	0.272244		63.26	0.167718		63.26	0.296216		63.26	0.379153
	63.3	0.271264		63.3	0.168415		63.3	0.295921		63.3	0.37889
	63.34	0.270336		63.34	0.167923		63.34	0.295555		63.34	0.379078
	63.38	0.2697		63.38	0.167806		63.38	0.295138		63.38	0.378077
	63.42	0.269028		63.42	0.167513		63.42	0.294636		63.42	0.377168
	63.46	0.26862		63.46	0.167244		63.46	0.29431		63.46	0.376554
	63.5	0.268025		63.5	0.166429		63.5	0.293443		63.5	0.376651
	63.54	0.267428		63.54	0.166281		63.54	0.292776		63.54	0.375847
	63.58	0.267004		63.58	0.167332		63.58	0.291931		63.58	0.37541
	63.62	0.266828		63.62	0.167122		63.62	0.291151		63.62	0.374553
	63.66	0.266426		63.66	0.165751		63.66	0.290278		63.66	0.373691
	63.69	0.26605		63.69	0.164995		63.69	0.289298		63.69	0.37324
	63.74	0.265652		63.74	0.163808		63.74	0.288673		63.74	0.372596
	63.77	0.265326		63.77	0.163246		63.77	0.287633		63.77	0.371537
	63.81	0.264805		63.81	0.163079		63.81	0.28675		63.81	0.370702
	63.85	0.264453		63.85	0.162811		63.85	0.285879		63.85	0.369911
	63.89	0.264435		63.89	0.16185		63.89	0.284749		63.89	0.3695
	63.93	0.264427		63.93	0.15515		63.93	0.284042		63.93	0.369332
	63.97	0.264133		63.97	0.14943		63.97	0.28281		63.97	0.367776
	64.01	0.26417		64.01	0.146192		64.01	0.281812		64.01	0.366372
	64.05	0.263899		64.05	0.140942		64.05	0.281005		64.05	0.365321
	64.09	0.264147		64.09	0.133407		64.09	0.280207		64.09	0.364593
	64.12	0.264134		64.12	0.14046		64.12	0.279415		64.12	0.363798
	64.17	0.264234		64.17	0.147112		64.17	0.278193		64.17	0.362842
	64.2	0.264619		64.2	0.143435		64.2	0.277202		64.2	0.362069
	64.24	0.264917		64.24	0.141247		64.24	0.27628		64.24	0.361433
	64.28	0.265028		64.28	0.146485		64.28	0.275074		64.28	0.360595
	64.32	0.265357		64.32	0.149504		64.32	0.273195		64.32	0.358512
	64.36	0.265651		64.36	0.149282		64.36	0.261966		64.36	0.357274
	64.4	0.2659		64.4	0.147271		64.4	0.255965		64.4	0.356214
	64.44	0.266122		64.44	0.1455		64.44	0.257132		64.44	0.35536
	64.48	0.26626		64.48	0.143948		64.48	0.256474		64.48	0.354519
	64.52	0.26677		64.52	0.142991		64.52	0.25142		64.52	0.353756
	64.56	0.267026		64.56	0.142031		64.56	0.254946		64.56	0.353125
	64.59	0.267238		64.59	0.1409		64.59	0.257823		64.59	0.351749
	64.63	0.26741		64.63	0.140066		64.63	0.257699		64.63	0.344036
	64.67	0.267592		64.67	0.139064		64.67	0.260146		64.67	0.340165
	64.72	0.267893		64.72	0.138384		64.72	0.266054		64.72	0.340033
	64.75	0.267991		64.75	0.137237		64.75	0.268418		64.75	0.33472
	64.79	0.267987		64.79	0.136149		64.79	0.2676		64.79	0.325914
	64.83	0.268108		64.83	0.135382		64.83	0.266345		64.83	0.330959
	64.87	0.268153		64.87	0.134059		64.87	0.265071		64.87	0.335371
	64.91	0.268306		64.91	0.133174		64.91	0.264611		64.91	0.331685
	64.95	0.269579		64.95	0.132451		64.95	0.263305		64.95	0.329278
	64.99	0.268723		64.99	0.132117		64.99	0.262148		64.99	0.335127
	65.02	0.268597		65.02	0.131323		65.02	0.26114		65.02	0.340663
	65.07	0.268341		65.07	0.130858		65.07	0.260645		65.07	0.342301
	65.11	0.268028		65.11	0.130376		65.11	0.259657		65.11	0.341445
	65.15	0.267762		65.15	0.129732		65.15	0.259095		65.15	0.339777
	65.18	0.267351		65.18	0.129483		65.18	0.258927		65.18	0.33814
	65.22	0.266862		65.22	0.129217		65.22	0.257818		65.22	0.337128
	65.26	0.266792		65.26	0.12891		65.26	0.257154		65.26	0.335607
	65.3	0.266106		65.3	0.128413		65.3	0.256663		65.3	0.334299
	65.34	0.265705		65.34	0.128198		65.34	0.256116		65.34	0.334254
	65.38	0.265197		65.38	0.127973		65.38	0.255625		65.38	0.333793
	65.42	0.264768		65.42	0.1275		65.42	0.255261		65.42	0.332968
	65.46	0.264259		65.46	0.127301		65.46	0.254991		65.46	0.332573
	65.5	0.26344		65.5	0.127304		65.5	0.254595		65.5	0.332198
	65.54	0.262706		65.54	0.127336		65.54	0.254403		65.54	0.330877
	65.57	0.262001		65.57	0.127187		65.57	0.254074		65.57	0.330416
	65.62	0.261361		65.62	0.126916		65.62	0.253407		65.62	0.330225
	65.65	0.260652		65.65	0.126842		65.65	0.253173		65.65	0.329793
	65.69	0.25996		65.69	0.126619		65.69	0.252737		65.69	0.32899
	65.73	0.259166		65.73	0.126535		65.73	0.252337		65.73	0.328105
	65.77	0.258242		65.77	0.126286		65.77	0.252158		65.77	0.327462
	65.81	0.257405		65.81	0.126196		65.81	0.251519		65.81	0.327635
	65.85	0.256542		65.85	0.126028		65.85	0.251039		65.85	0.326831
	65.89	0.255629		65.89	0.125946		65.89	0.250661		65.89	0.326114
	65.93	0.254651		65.93	0.125849		65.93	0.250302		65.93	0.325827
	65.97	0.25382		65.97	0.125703		65.97	0.249636		65.97	0.325645
	66.01	0.253065		66.01	0.125692		66.01	0.249043		66.01	0.325107
