# Supplementary material for: Saccharomyces cerevisiae DJ-1 paralogs maintain genome integrity through glycation repair of nucleic acids and proteins
Source: eLife journal article supplement (doi:10.7554/elife.88875), 2023-08-07
Supplement: supp [file Figure 2F graph.xlsx]

## Sheet: Sheet1
	FIGURE 2F AREA UNDER THE CURVE VALUES
	WT-GO	WT+GO	∆Q-GO	∆Q+GO
	1.333	1.27764	1.45102	0.857478
	1.41308	1.3202	1.12982	0.845766
