# Supplementary material for: Saccharomyces cerevisiae DJ-1 paralogs maintain genome integrity through glycation repair of nucleic acids and proteins
Source: eLife journal article supplement (doi:10.7554/elife.88875), 2023-08-07
Supplement: supp [file Figure 2G graph.xlsx]

## Sheet: Sheet1
	Figure 2G Normalized densitomeric values
	WT	∆glo1	∆31	∆32	∆33	∆34
	1	6.82638	3.11726	0.718971	0.744363	1.43084
	0.89	8.6812	2.75812	1.31386	1.07539	1.32958
	0.93	7.2789	3.57312	0.77219	1.48302	0.999567
