# Supplementary material for: Saccharomyces cerevisiae DJ-1 paralogs maintain genome integrity through glycation repair of nucleic acids and proteins
Source: eLife journal article supplement (doi:10.7554/elife.88875), 2023-08-07
Supplement: supp [file Figure 2H graph.xlsx]

## Sheet: Sheet1
	Figure 2H Normalized densitomeric values
	WT	∆glo1	∆31/32	∆32/33	∆33/34	∆T	∆Q
	1	5.26449	1.27994	1.46942	1.10033	1.25153	1.36779
	0.9	6.99866	1.56809	1.25239	1.54916	1.57803	1.4366
	0.95	6.02451	1.07479	1.30142	1.4163	1.31347	1.23583
