# Supplementary material for: Saccharomyces cerevisiae DJ-1 paralogs maintain genome integrity through glycation repair of nucleic acids and proteins
Source: eLife journal article supplement (doi:10.7554/elife.88875), 2023-08-07
Supplement: supp [file Figure 2I graph.xlsx]

## Sheet: Sheet1
	Figure 2I Normalized densitomeric values
	WT	∆glo1	∆31	∆32	∆33	∆34
	1	7.82638	3.11726	0.718971	0.744363	0.430844
	0.89	9.6812	4.05812	1.01386	1.17539	1.32958
	0.93	10.2789	3.7312	1.37219	1.48302	0.999567
