# Supplementary material for: Saccharomyces cerevisiae DJ-1 paralogs maintain genome integrity through glycation repair of nucleic acids and proteins
Source: eLife journal article supplement (doi:10.7554/elife.88875), 2023-08-07
Supplement: supp [file Figure 2J graph.xlsx]

## Sheet: Sheet1
		Figure 2J Normalized densitomeric values
		WT	∆glo1	∆31/32	∆32/33	∆33/34	∆T	∆Q
		1	7.64162	2.91001	3.55515	2.76629	2.83298	3.08365
		1.07	8.13648	2.59732	2.04216	2.32753	2.17935	2.87934
		0.99	7.34821	2.95315	2.74264	2.85131	2.55319	2.57213
