# Supplementary material for: Saccharomyces cerevisiae DJ-1 paralogs maintain genome integrity through glycation repair of nucleic acids and proteins
Source: eLife journal article supplement (doi:10.7554/elife.88875), 2023-08-07
Supplement: supp [file Figure 3 figure supplement 1E graph.xlsx]

## Sheet: Sheet1
			Figure 3-figure supplement E					Fold change in expression
			Hsp31-GO	Hsp31+GO	Hsp32-GO	Hsp32+GO	Hsp33-GO	Hsp33+GO	Hsp34-GO	Hsp34+GO
			1	2.8	1	1.9	1	1.85	1	2.1
			0.7	2.5	0.8	2.8	0.78	2.6	0.89	2.53
