# Supplementary material for: Saccharomyces cerevisiae DJ-1 paralogs maintain genome integrity through glycation repair of nucleic acids and proteins
Source: eLife journal article supplement (doi:10.7554/elife.88875), 2023-08-07
Supplement: supp [file Figure 3A graph.xlsx]

## Sheet: Sheet1
	FIGURE 3A	RELATIVE GLYOXALASE ACTIVITY
	BSA	Hsp31	Hsp32	Hsp33	Hsp34
	0.014	0.582	0.585	0.542667	0.603
	0.020333	0.571729	0.542146	0.58571	0.571759
	0.033	0.597149	0.577198	0.560162	0.561028
