# Supplementary material for: Saccharomyces cerevisiae DJ-1 paralogs maintain genome integrity through glycation repair of nucleic acids and proteins
Source: eLife journal article supplement (doi:10.7554/elife.88875), 2023-08-07
Supplement: supp [file Figure 3B graph.xlsx]

## Sheet: Sheet1
	FIGURE 3B		Relative velocity
			(mM/min)
	GO (mM)	Hsp31	Hsp32	Hsp33	Hsp34
	0	0	0	0	0
	0.1	0.001589	0.001218	0.001615	0.001839
	0.3	0.003621	0.003718	0.0032064	0.0034854
	0.5	0.010057	0.009275	0.009233	0.008804
	0.7	0.014139	0.014657	0.014165	0.0137
	0.9	0.014129	0.014593	0.014332	0.014275
