# Supplementary material for: Saccharomyces cerevisiae DJ-1 paralogs maintain genome integrity through glycation repair of nucleic acids and proteins
Source: eLife journal article supplement (doi:10.7554/elife.88875), 2023-08-07
Supplement: supp [file Figure 3D graph.xlsx]

## Sheet: Sheet1
	Figure 3D Normalized densitomeric values
	WT	∆Q	∆Q/31↑	∆Q/32↑	∆Q/33↑	∆Q/34↑
	0.999993	4.59296	2.29638	1.84634	2.11289	3.10835
	0.9421	4.6529	2.5987	2.5321	2.3961	2.4695
	1.031	4.7431	2.3467	2.1653	2.021	2.8421
