# Supplementary material for: Saccharomyces cerevisiae DJ-1 paralogs maintain genome integrity through glycation repair of nucleic acids and proteins
Source: eLife journal article supplement (doi:10.7554/elife.88875), 2023-08-07
Supplement: supp [file Figure 3E graph.xlsx]

## Sheet: Sheet1
		Figure 3F Normalized densitomeric values
		WT	∆Q	∆Q/31↑	∆Q/32↑	∆Q/33↑	∆Q/34↑
		1	4.02826	2.39334	1.95865	2.47857	3.31618
		0.95	5.6348	2.42865	2.5662	2.7364	2.412
		1.0643	4.9521	2.0221	2.8532	1.9252	2.0514
