# Supplementary material for: Saccharomyces cerevisiae DJ-1 paralogs maintain genome integrity through glycation repair of nucleic acids and proteins
Source: eLife journal article supplement (doi:10.7554/elife.88875), 2023-08-07
Supplement: supp [file Figure 3F graph.xlsx]

## Sheet: Sheet1
		Figure 3E Normalized densitomeric values
		WT	∆Q	∆Q/31↑	∆Q/32↑	∆Q/33↑	∆Q/34↑
		1	2.48139	1.46892	1.27602	0.325017	1.09647
		1.03	2.95112	1.29781	1.61548	1.26231	1.57892
		0.96	3.17983	1.93778	1.84312	1.73482	1.95672
