# Supplementary material for: Saccharomyces cerevisiae DJ-1 paralogs maintain genome integrity through glycation repair of nucleic acids and proteins
Source: eLife journal article supplement (doi:10.7554/elife.88875), 2023-08-07
Supplement: supp [file Figure 3G graph.xlsx]

## Sheet: Sheet1
	FIGURE 3G			Relative
				Glyoxalase Activity
	BSA	Hsp31	Hsp32	Hsp33	Hsp34	31 C138A	32 C138A	33 C138A	34 C138A
	0.014	0.582	0.585	0.542667	0.603	0.0323	0.02619	0.0292	0.0338
	0.020333	0.571729	0.542146	0.58571	0.571759	0.0217	0.0307	0.0328	0.02613
	0.033	0.597149	0.577198	0.560162	0.561028	0.02805	0.0313	0.0317	0.0341
