# Supplementary material for: Saccharomyces cerevisiae DJ-1 paralogs maintain genome integrity through glycation repair of nucleic acids and proteins
Source: eLife journal article supplement (doi:10.7554/elife.88875), 2023-08-07
Supplement: supp [file Figure 4A graph.xlsx]

## Sheet: Sheet1
	FIGURE 4A	RELATIVE Methylglyoxalase ACTIVITY
	BSA	Hsp31	Hsp32	Hsp33	Hsp34
	0.24	1.11	0.39	0.32	0.35
	0.15	1.02	0.28	0.25	0.24
	0.21	1.09	0.31	0.28	0.31
