# Supplementary material for: Saccharomyces cerevisiae DJ-1 paralogs maintain genome integrity through glycation repair of nucleic acids and proteins
Source: eLife journal article supplement (doi:10.7554/elife.88875), 2023-08-07
Supplement: supp [file Figure 4C graph.xlsx]

## Sheet: Sheet1
		Figure 4C Normalized densitomeric values
		WT	∆Q	∆Q/31↑	∆Q/32↑	∆Q/33↑	∆Q/34↑
		1	7.19353	3.01272	8.25214	9.91016	9.09565
		0.96	7.41289	4.46917	7.75189	8.14262	7.0413
		1.52	6.36372	3.96741	9.26713	7.89612	8.91654
