# Supplementary material for: Saccharomyces cerevisiae DJ-1 paralogs maintain genome integrity through glycation repair of nucleic acids and proteins
Source: eLife journal article supplement (doi:10.7554/elife.88875), 2023-08-07
Supplement: supp [file Figure 4D graph.xlsx]

## Sheet: Sheet1
		Figure 4D Normalized densitomeric values
		WT	∆Q	∆Q/31↑	∆Q/32↑	∆Q/33↑	∆Q/34↑
		1	3.39717	1.54103	6.07795	6.69571	3.94557
		1.054	6.07795	1.39722	5.84524	4.98752	5.57654
		0.9831	6.69571	1.48641	4.43685	5.32165	5.16864
