# Supplementary material for: Saccharomyces cerevisiae DJ-1 paralogs maintain genome integrity through glycation repair of nucleic acids and proteins
Source: eLife journal article supplement (doi:10.7554/elife.88875), 2023-08-07
Supplement: supp [file Figure 4E graph.xlsx]

## Sheet: Sheet1
		Figure 4E Normalized densitomeric values
		WT	∆Q	∆Q/31↑	∆Q/32↑	∆Q/33↑	∆Q/34↑
		1	3.08213	1.57737	3.23777	3.15098	2.2336
		0.95	3.69761	1.26908	3.55789	3.64319	3.74617
		1.07	3.37591	1.83571	3.05217	3.36299	3.27625
