# Supplementary material for: Saccharomyces cerevisiae DJ-1 paralogs maintain genome integrity through glycation repair of nucleic acids and proteins
Source: eLife journal article supplement (doi:10.7554/elife.88875), 2023-08-07
Supplement: supp [file Figure 4F graph.xlsx]

## Sheet: Sheet1
	FIGURE 4F			Relative
				Methylglyoxalase Activity
		BSA	Hsp31	31 C138A
		0.24	1.11	0.32
		0.15	1.02	0.21
		0.21	1.09	0.19
