# Supplementary material for: Saccharomyces cerevisiae DJ-1 paralogs maintain genome integrity through glycation repair of nucleic acids and proteins
Source: eLife journal article supplement (doi:10.7554/elife.88875), 2023-08-07
Supplement: supp [file Figure 7F graph.xlsx]

## Sheet: Sheet1
		Figure 7F Normalized densitomeric values
		WT	∆Q	∆Q/31↑	∆Q/32↑	∆Q/33↑	∆Q/34↑
		1	10.4263	2.61797	2.29359	2.7335	2.25342
		0.98	12.4875	3.39471	2.93782	4.81631	3.95735
		1.2	9.72861	4.24328	3.67209	2.29471	4.2626
