# Supplementary material for: Saccharomyces cerevisiae DJ-1 paralogs maintain genome integrity through glycation repair of nucleic acids and proteins
Source: eLife journal article supplement (doi:10.7554/elife.88875), 2023-08-07
Supplement: supp [file Graph 7G.xlsx]

## Sheet: Sheet1
		Figure 7G		Mitochondria DNA glycation
		WT	∆Q	31	32	33	34
		1	4.63374	2.19636	2.57159	2.0799	2.36924
		0.99	5.38132	2.53712	1.86943	1.71329	2.69202
		1.4	3.92931	1.93978	2.36319	2.42802	1.7742
