# Supplementary material for: Saccharomyces cerevisiae DJ-1 paralogs maintain genome integrity through glycation repair of nucleic acids and proteins
Source: eLife journal article supplement (doi:10.7554/elife.88875), 2023-08-07
Supplement: supp [file Graph 8B.xlsx]

## Sheet: Sheet1
				Figure 8B
			WT GO-		WT GO+		∆Q GO-		∆Q GO+
			1	0.942274	0.972794	0.96356	1.57404	1.5734	1.78831	1.77793
