# Supplementary material for: Saccharomyces cerevisiae DJ-1 paralogs maintain genome integrity through glycation repair of nucleic acids and proteins
Source: eLife journal article supplement (doi:10.7554/elife.88875), 2023-08-07
Supplement: supp [file Graph 8C.xlsx]

## Sheet: Sheet1
					Figure 8C
				WT GO-		WT GO+		∆Q GO-		∆Q GO+
				1	1	0.731621	0.839339	1.43644	1.71353	0.616862	0.682664
