# Supplementary material for: Saccharomyces cerevisiae DJ-1 paralogs maintain genome integrity through glycation repair of nucleic acids and proteins
Source: eLife journal article supplement (doi:10.7554/elife.88875), 2023-08-07
Supplement: supp [file Graph 8D.xlsx]

## Sheet: Sheet1
		Figure 8D
		WT	∆Q
		1	0.61
		1	0.574815
		1	0.632308
