# Supplementary material for: Saccharomyces cerevisiae DJ-1 paralogs maintain genome integrity through glycation repair of nucleic acids and proteins
Source: eLife journal article supplement (doi:10.7554/elife.88875), 2023-08-07
Supplement: supp [file Graph S5G.xlsx]

## Sheet: Sheet1
			Figure S5G		RAD52 foci count
			WT	∆Q
			23	120
			34	109
			28	112
