# Supplementary material for: Saccharomyces cerevisiae DJ-1 paralogs maintain genome integrity through glycation repair of nucleic acids and proteins
Source: eLife journal article supplement (doi:10.7554/elife.88875), 2023-08-07
Supplement: supp [file Graph S7A.xlsx]

## Sheet: Sheet1
			Figure S7A
			31 GO-	31 GO+	32 GO-	32 GO+	33 GO-	33 GO+	34 GO-	34 GO+
			1	2.03414	1	1.88018	1	1.9038	1	1.83663
			1	2.72347	1	1.9326	1	2.99354	1	2.83961
			1	2.45711	1	2.93228	1	2.82327	1	2.72278
