# Supplementary material for: Saccharomyces cerevisiae DJ-1 paralogs maintain genome integrity through glycation repair of nucleic acids and proteins
Source: eLife journal article supplement (doi:10.7554/elife.88875), 2023-08-07
Supplement: supp [file Graph S7B.xlsx]

## Sheet: Sheet1
		Figure S7B
		31 MG-	31MG+
		1	3.01925
		1	2.5714
		1	2.86643
